# Supplementary material
Source: PubMed Central journal article supplement (PMC5812009)
Supplement: NIHMS940710-supplement-Supplement.pdf [file NIHMS940710-supplement-Supplement.pdf]

## Supplementary online content

**eMethods.** Physical activity questionnaire validation and NIH-AARP Diet and Health Study analyses

**eTable 1.** Case numbers in the current study as compared with those in most recent meta-analyses examining leisure time physical activity and cancer risk in prospective studies

**eTable 2.** Median and interquartile range (IQR) of physical activity levels in the seven cohorts in which MET-hours/week could be estimated

**eTable 3.** International Classification of Diseases for Oncology, 3rd Ed. Codes by cancer site

**eTable 4.** Number of cohorts and cases excluded due to insufficient case numbers in cohort, by cancer type

**eTable 5.** Prevalence of demographic and lifestyle characteristics by leisure time physical activity quintile

**eTable 6.** Leisure time physical activity and hazard ratios of cancer: impact of omitting each cohort in turn from the analysis

**eTable 7.** Comparison of summary hazard ratios (HRs) and 95% confidence intervals (CIs) in all studies and in only studies with a validated questionnaire (qx)

**eTable 8.** Comparison of hazard ratios (HRs) and 95% confidence intervals (CIs) in the NIH-AARP Diet and Health Study in models adjusted for standard risk factors and models additionally adjusted for diet

**eFigure 1.** Association between leisure-time physical activity and cancer type, allowing for non-linear effects, with 95% confidence intervals

**eFigure 2a-z.** Leisure time physical activity and cohort-specific risk of:

- |                               |                              |
|-------------------------------|------------------------------|
| a. Esophageal adenocarcinoma  | n. Rectum cancer             |
| b. Gallbladder cancer         | o. Bladder cancer            |
| c. Liver cancer               | p. Breast cancer             |
| d. Lung cancer                | q. Non-Hodgkin lymphoma      |
| e. Kidney cancer              | r. Thyroid cancer            |
| f. Small intestine cancer     | s. Gastric non-cardia cancer |
| g. Gastric cardia cancer      | t. Soft tissue cancer        |
| h. Endometrial cancer         | u. Pancreas cancer           |
| i. Esophageal squamous cancer | v. Lymphocytic leukemia      |
| j. Myeloid leukemia           | w. Ovary cancer              |
| k. Myeloma                    | x. Brain cancer              |
| l. Colon cancer               | y. Prostate cancer           |
| m. Head and neck cancer       | z. Malignant melanoma        |

**eFigure 3.** Summary multivariable hazard ratios (HR) and 95% confidence intervals (CI) for a high (90th percentile) versus low (10th percentile) level of leisure-time physical activity, by cancer type, with adjustment for BMI

**eFigure 3.** Summary multivariable hazard ratios (HR) and 95% confidence intervals (CI) for a high (90th percentile) versus low (10th percentile) level of leisure-time physical activity, by cancer type, with adjustment for BMI

**eFigure 4.** Summary multivariable hazard ratios (HR) and 95% confidence intervals (CI) for a higher (90th percentile) versus lower (10th percentile) level of leisure-time physical activity, by cancer type, stratified by geographic region, United States or Europe.

**eFigure 5.** Summary multivariable hazard ratios (HR) and 95% confidence intervals (CI) for a higher (90th percentile) versus lower (10th percentile) level of leisure-time physical activity, by cancer type, stratified by history of hormone replacement therapy, never users or ever users.

**eFigure 6.** Summary multivariable hazard ratios (HR) and 95% confidence intervals (CI) for a higher (90th percentile) versus lower (10th percentile) level of leisure-time physical activity, by cancer type, stratified by gender.

**eFigure 7.** Summary multivariable hazard ratios (HR) and 95% confidence intervals (CI) for a higher (90th percentile) versus lower (10th percentile) level of leisure-time physical activity, by cancer type, stratified by race/ethnicity.

**eFigure 8.** Summary multivariable hazard ratios (HR) and 95% confidence intervals (CI) for a higher (90th percentile) versus lower (10th percentile) level of leisure-time physical activity, by cancer type, stratified by period of follow-up.

**eFigure 9.** Multivariable hazard ratios (HRs) and 95% confidence intervals (CIs) in the NIH-AARP Diet and Health Study for breast cancer subtypes (Panel A), for prostate cancer subtypes (Panel B), and for malignant melanoma, stratified by ground level solar ultraviolet radiation† (Panel C).

## **eAcknowledgments**

**eMethods.** Physical activity questionnaire validation and NIH-AARP Diet and Health Study analyses

*Physical activity questionnaire validation*

Of the 12 physical activity assessments used in our pooled analysis, 10 of these assessments—or assessments worded nearly identically to these 10—have been previously validated. Several cohorts, for example, have adapted the following question from the College Health Alumni Study:

“At least once a week, do you engage in any regular activity similar to brisk walking, jogging, bicycling, etc., long enough to work up a sweat? If yes, how many times per week?”

In the Breast Cancer Detection and Demonstration Project (BCDDP), participants were asked:

“At least once a week, do you engage in any regular activity similar to brisk walking, bicycling, etc., long enough to work up a sweat? (If yes) Number of times per week?”

In the Physician’s Health Study (PHS), participants were asked:

“Do you engage in a regular program of exercise vigorous enough to work up a sweat? If yes, how many days per week?”

The College Health Alumni survey question, and alternate versions performed similarly in validation studies<sup>1-3</sup>, as reviewed in 2011 by Milton et al<sup>4</sup>.

The table below shows, for each cohort, a study or studies examining the validity of the physical activity assessment used, or a nearly identical instrument. Reference measures in these studies included seven day physical activity records, accelerometry, and doubly labeled-based assessments of physical activity.

| Cohort | Validation study                                                   | Reference measure              | Primary findings                                                                                                            |
|--------|--------------------------------------------------------------------|--------------------------------|-----------------------------------------------------------------------------------------------------------------------------|
| AARP   | Milton et al. 2011 <sup>4</sup><br>Milton et al. 2013 <sup>5</sup> | Accelerometry                  | r=0.46 between self-reported days of 30+ minutes of MVPA vs. accelerometry-measured days of 30+ minutes of MVPA             |
| BCDDP  | Milton et al. 2011 <sup>4</sup><br>Milton et al. 2013 <sup>5</sup> | Accelerometry                  | r=0.46 between self-reported days of 30+ minutes of MVPA vs. accelerometry-measured days of 30+ minutes of MVPA             |
| COSM   | Orsini et al. <sup>6</sup>                                         | 7-day physical activity record | r=0.42 between past year leisure-time activity and 7-day record leisure-time physical activity                              |
| CPSII  | Bonnefoy et al. <sup>7</sup>                                       | Doubly labeled water           | r=0.61 between participation in leisure time activities and physical activity level ratio                                   |
| EPIC   | Besson et al. <sup>8</sup>                                         | Doubly labeled water           | r=0.44 between recreational physical activity and PAEE                                                                      |
| IWHS   | Marshall et al. <sup>9</sup>                                       | Accelerometry                  | 71% agreement between self-report and accelerometry in number of days meeting physical activity recommendations (kappa=0.4) |
| PHS    | Milton et al. 2011 <sup>4</sup><br>Milton et al. 2013 <sup>5</sup> | Accelerometry                  | r=0.46 between self-reported days of 30+ minutes of MVPA vs. accelerometry-measured days of 30+ minutes of MVPA             |

|      |                              |                                |                                                                                                |
|------|------------------------------|--------------------------------|------------------------------------------------------------------------------------------------|
| SMC  | Orsini et al. <sup>6</sup>   | 7-day physical activity record | r=0.42 between past year leisure-time activity and 7-day record leisure-time physical activity |
| USRT | Orsini et al. <sup>6</sup>   | 7-day physical activity record | r=0.42 between past year leisure-time activity and 7-day record leisure-time physical activity |
| WLH  | None                         |                                |                                                                                                |
| WHS  | Bonnefoy et al. <sup>7</sup> | Doubly labeled water           | r=0.61 between participation in leisure time activities and physical activity level ratio      |
| PLCO | None                         |                                |                                                                                                |

### *NIH-AARP Diet and Health Study analyses*

We conducted three additional analyses solely within the NIH-AARP Diet and Health Study to take advantage of data items not otherwise available to the consortium. Specifically, we evaluated 1) associations between physical activity and risk of non-advanced, advanced, and fatal prostate cancers; 2) associations between physical activity and risk of estrogen receptor positive (ER+) and estrogen receptor negative (ER-) breast cancers; and; 3) the association between physical activity and risk of malignant melanoma, stratified by ground-level solar ultraviolet radiation exposure.

The NIH-AARP analyses included a total of 507,826 participants, including 308,073 men and 199,753 women, from 11 different states who were followed for cancer incidence from 1995 through 2006. Incident first primary cancer cases were identified through probabilistic linkage with cancer registry databases for the state of residence for study participants. The cancer registries are certified by the North American Association of Central Cancer Registries as being ≥90% complete within two years of cancer occurrence and we have previously validated that cancer case ascertainment through these registries is approximately 90% complete within our cohort<sup>10</sup>. Incident cancer cases were invasive and comprised only the first malignancy diagnosed during the follow-up period if multiple cancers were diagnosed in the same participant.

#### *Analyses of non-advanced, advanced, and fatal prostate cancers*

Information on prostate cancer stage was obtained from the state cancer registry databases. Advanced prostate cancer cases were defined as cases with clinical or pathologic tumor classifications, according to the American Joint Committee on Cancer 1998 tumor-lymph node-metastasis classification system<sup>11</sup>, of T3 or T4, N1 status, or M1 status, or incident cases who subsequently died of prostate cancer (through 2011). Any incident cases that subsequently died from prostate cancer (through 2011) were also classified as fatal cases. Censoring of follow-up occurred on the date of the incident case, regardless of later mortality.

#### *Analyses of estrogen receptor positive (ER+) and estrogen receptor negative (ER-) breast cancers*

Hormone receptor status was available from 7 (California, Louisiana, Georgia, North Carolina, New Jersey, Arizona, and Nevada) of the 11 reporting states, with a positive hormone receptor status recorded at a threshold of at least 10 fmol receptor/mg total protein. Although hormone receptor data were unavailable for cases from Florida, Pennsylvania, Michigan, and Texas, the distribution of risk factors considered in our study was similar for women from states with and without hormone receptor information.

### *Analyses stratified by solar ultraviolet radiation for malignant melanoma*

Solar ultraviolet radiation (erythemal dose) was assessed from the Total Ozone Mapping Spectrometer (TOMS) dataset of the National Aeronautics and Space Administration. The NASA TOMS database (<http://toms.gsfc.nasa.gov>) provided ground-level noon-time erythemal estimates on a 1° latitude by 1.25° longitude grid within the United States. Erythemal exposure was assigned by deterministic linkage of the census tract centroid of participant residence to the closest point on the TOMS grid using ArcView 9.3 (Esri, Redlands, CA). The census tract for each subject was assigned by geocoding the longitude and latitude coordinates of residential address. The erythemal exposure was averaged across the month of July because summer is when surface UVR is strongest, noise factors such as clouds and aerosols are less influential<sup>12</sup>, and because it is when the TOMS UVR data are in their best agreement with ground-based data<sup>13</sup>. Erythemal exposure was expressed in terms of biological damage per square meter<sup>14</sup>.

We analyzed associations between physical activity and melanoma according to low and high solar ultraviolet radiation exposure levels, defined as the bottom tertile and the top two tertiles of erythemal exposure. Multiplicative interaction was determined by modeling with and without the cross-products of physical activity and erythemal exposure group, and conducting likelihood ratio tests.

## eMethods references

1. Siconolfi SF, Lasater TM, Snow RC, Carleton RA. Self-reported physical activity compared with maximal oxygen uptake. *Am J Epidemiol* 1985;122(1):101-105.
2. Kohl HW, Blair SN, Paffenbarger RS, Jr., Macera CA, Kronenfeld JJ. A mail survey of physical activity habits as related to measured physical fitness. *Am J Epidemiol* 1988;127(6):1228-1239.
3. Washburn RA, Goldfield SR, Smith KW, McKinlay JB. The validity of self-reported exercise-induced sweating as a measure of physical activity. *Am J Epidemiol* 1990;132(1):107-113.
4. Milton K, Bull FC, Bauman A. Reliability and validity testing of a single-item physical activity measure. *Br J Sports Med* 2011;45(3):203-208.
5. Milton K, Clemes S, Bull F. Can a single question provide an accurate measure of physical activity? *Br J Sports Med* 2013;47(1):44-48.
6. Orsini N, Bellocco R, Bottai M et al. Validity of self-reported total physical activity questionnaire among older women. *Eur J Epidemiol* 2008;23(10):661-667.
7. Bonnefoy M, Normand S, Pachiardi C, Lacour JR, Laville M, Kostka T. Simultaneous validation of ten physical activity questionnaires in older men: a doubly labeled water study. *J Am Geriatr Soc* 2001;49(1):28-35.
8. Besson H, Brage S, Jakes RW, Ekelund U, Wareham NJ. Estimating physical activity energy expenditure, sedentary time, and physical activity intensity by self-report in adults. *Am J Clin Nutr* 2010;91(1):106-114.
9. Marshall AL, Smith BJ, Bauman AE, Kaur S. Reliability and validity of a brief physical activity assessment for use by family doctors. *Br J Sports Med* 2005;39(5):294-297.
10. Michaud D.S., Midthune D., Hermansen S. et al. Comparison of cancer registry case ascertainment with SEER estimates and self-reporting in a subset of the NIH-AARP Diet and Health Study. *Journal of Registry Management* 2005;32(2):70-75.
11. Fleming ID, Cooper JS, Henson DE. *AJCC cancer staging manual*. 5th ed. Philadelphia, PA: Lippincott-Raven; 1998.
12. Ziemke JR, Chandra S, Herman J, Varotsos C. Erythemally weighted UV trends over northern latitudes derived from Nimbus 7 TOMS measurements. *Journal of Geophysical Research: Atmospheres* 2000;105(D6):7373-7382.
13. Kalliskota S, Kaurola J, Taalas P, Herman JR, Celarier EA, Krotkov NA. Comparison of daily UV doses estimated from Nimbus 7/TOMS measurements and ground-based spectroradiometric data. *Journal of Geophysical Research: Atmospheres* 2000;105(D4):5059-5067.
14. Herman JR, Krotkov N, Celarier E, Larko D, Labow G. Distribution of UV radiation at the Earth's surface from TOMS-measured UV-backscattered radiances. *Journal of Geophysical Research: Atmospheres* 1999;104(D10):12059-12076.

**eTable 1.** Case numbers in the current study as compared with those in most recent meta-analyses examining leisure time physical activity and cancer risk in prospective studies

| Cancer                             | Reference | Current study | Literature meta-analysis | Ratio† |
|------------------------------------|-----------|---------------|--------------------------|--------|
| Esophageal adenocarcinoma          | 1         | 899           | 454                      | 2.0    |
| Gallbladder                        | 2         | 382           | 123                      | 3.1    |
| Liver*                             | 2         | 1,384         | 628                      | 2.2    |
| Lung                               | 3         | 19,133        | 12,966                   | 1.5    |
| Kidney                             | 4         | 4,548         | 2,435                    | 1.9    |
| Small intestine*                   | 5         | 503           | 237                      | 2.1    |
| Gastric cardia adenocarcinoma      | 1         | 790           | 436                      | 1.8    |
| Endometrial                        | 6         | 5,346         | 4,525                    | 1.2    |
| Esophageal squamous cell carcinoma | 1         | 442           | 149                      | 3.0    |
| Myeloid leukemia                   | 7         | 1,692         | 338                      | 5.0    |
| Myeloma                            | 8         | 2,161         | 1,355                    | 1.6    |
| Colon                              | 9         | 14,160        | 15,537                   | 0.9    |
| Head and neck*                     | 10        | 3,985         | 1,249                    | 3.2    |
| Rectum                             | 11        | 5,531         | 2,617                    | 2.1    |
| Bladder                            | 12        | 9,073         | 3,418                    | 2.7    |
| Breast                             | 13        | 35,178        | 37,568                   | 0.9    |
| Non-Hodgkin Lymphoma               | 8         | 6,953         | 3,897                    | 1.8    |
| Thyroid                            | 14        | 1,829         | 818                      | 2.2    |
| Gastric non-cardia adenocarcinoma  | 1         | 1,428         | 781                      | 1.8    |
| Soft Tissue                        | --        | 851           | 0                        | ∞      |
| Pancreas                           | 15        | 4,186         | 5,720                    | 0.7    |
| Lymphocytic leukemia               | --        | 2,160         | 0                        | ∞      |
| Ovary                              | 16        | 2,880         | 2,467                    | 1.2    |
| Brain*                             | 17        | 2,110         | 257                      | 8.2    |
| Prostate                           | 18        | 46,890        | 31,106                   | 1.5    |
| Malignant melanoma                 | --        | 12,438        | 0                        | ∞      |

\* Case numbers are based on the largest prospective cohort study as no meta-analyses or reviews have been published

† Ratio compares the number of cases in the present study with those in the cited literature

#### eTable 1 references

1. Behrens G, Jochem C, Keimling M, Ricci C, Schmid D, Leitzmann MF. The association between physical activity and gastroesophageal cancer: systematic review and meta-analysis. *Eur J Epidemiol* 2014;29(3):151-170.
2. Behrens G, Matthews CE, Moore SC et al. The association between frequency of vigorous physical activity and hepatobiliary cancers in the NIH-AARP Diet and Health Study. *Eur J Epidemiol* 2013;28(1):55-66.
3. Sun JY, Shi L, Gao XD, Xu SF. Physical activity and risk of lung cancer: a meta-analysis of prospective cohort studies. *Asian Pac J Cancer Prev* 2012;13(7):3143-3147.
4. Behrens G, Leitzmann MF. The association between physical activity and renal cancer: systematic review and meta-analysis. *Br J Cancer* 2013;108(4):798-811.
5. Cross AJ, Hollenbeck AR, Park Y. A large prospective study of risk factors for adenocarcinomas and malignant carcinoid tumors of the small intestine. *Cancer Causes Control* 2013;24(9):1737-1746.
6. Keum N, Ju W, Lee DH et al. Leisure-time physical activity and endometrial cancer risk: dose-response meta-analysis of epidemiological studies. *Int J Cancer* 2014;135(3):682-694.
7. Ma X, Park Y, Mayne ST et al. Diet, lifestyle, and acute myeloid leukemia in the NIH-AARP cohort. *Am J Epidemiol* 2010;171(3):312-322.
8. Jochem C, Leitzmann MF, Keimling M, Schmid D, Behrens G. Physical activity in relation to risk of hematologic cancers: a systematic review and meta-analysis. *Cancer Epidemiol Biomarkers Prev* 2014;23(5):833-846.
9. Boyle T, Keegel T, Bull F, Heyworth J, Fritschi L. Physical activity and risks of proximal and distal colon cancers: a systematic review and meta-analysis. *J Natl Cancer Inst* 2012;104(20):1548-1561.
10. Leitzmann MF, Koebnick C, Freedman ND et al. Physical activity and head and neck cancer risk. *Cancer Causes Control* 2008;19(10):1391-1399.
11. Robsahm TE, Aagnes B, Hjartaker A, Langseth H, Bray FI, Larsen IK. Body mass index, physical activity, and colorectal cancer by anatomical subsites: a systematic review and meta-analysis of cohort studies. *Eur J Cancer Prev* 2013;22(6):492-505.
12. Keimling M, Behrens G, Schmid D, Jochem C, Leitzmann MF. The association between physical activity and bladder cancer: systematic review and meta-analysis. *Br J Cancer* 2014;110(7):1862-1870.
13. Wu Y, Zhang D, Kang S. Physical activity and risk of breast cancer: a meta-analysis of prospective studies. *Breast Cancer Res Treat* 2013;137(3):869-882.
14. Kitahara CM, Platz EA, Beane Freeman LE et al. Physical activity, diabetes, and thyroid cancer risk: a pooled analysis of five prospective studies. *Cancer Causes Control* 2012.
15. O'Rourke MA, Cantwell MM, Cardwell CR, Mulholland HG, Murray LJ. Can physical activity modulate pancreatic cancer risk? a systematic review and meta-analysis. *Int J Cancer* 2010;126(12):2957-2968.
16. Zhong S, Chen L, Lv M, Ma T, Zhang X, Zhao J. Nonoccupational physical activity and risk of ovarian cancer: a meta-analysis. *Tumour Biol* 2014;35(11):11065-11073.
17. Moore SC, Rajaraman P, Dubrow R et al. Height, body mass index, and physical activity in relation to glioma risk. *Cancer Res* 2009;69(21):8349-8355.
18. Liu Y, Hu F, Li D et al. Does physical activity reduce the risk of prostate cancer? A systematic review and meta-analysis. *Eur Urol* 2011;60(5):1029-1044.



**eTable 2.** Median and interquartile range (IQR) of physical activity levels in the seven cohorts in which MET-hours/week could be estimated

| Study                                                | Median (IQR)<br>MET-hours/week |
|------------------------------------------------------|--------------------------------|
| Cohort of Swedish Men                                | 8 (4-16)                       |
| Cancer Prevention Study II                           | 8 (4-18)                       |
| Prostate, Lung, Colorectal, and Ovarian Cancer Trial | 8 (2-12)                       |
| Swedish Mammography Cohort                           | 8 (4-8)                        |
| U.S. Radiologist Technologist Study                  | 8 (2-22)                       |
| Women's Health Study                                 | 8 (2-17)                       |
| Women's Lifestyle and Health Study                   | 11 (3-23)                      |

**eTable 3. International Classification of Diseases for Oncology, 3<sup>d</sup> Ed. Codes by cancer site**

| <b>Cancer site</b>        | <b>ICD-O-3 codes and, if applicable, ICD-O-3 histology</b>                                                                                                                                                                                                                                                                                                                                                                                                                                                                                                                                                                                        |
|---------------------------|---------------------------------------------------------------------------------------------------------------------------------------------------------------------------------------------------------------------------------------------------------------------------------------------------------------------------------------------------------------------------------------------------------------------------------------------------------------------------------------------------------------------------------------------------------------------------------------------------------------------------------------------------|
| Esophageal adenocarcinoma | C150-159; histologies 8140,8142,8144,8261,8310,8480,8481,8570                                                                                                                                                                                                                                                                                                                                                                                                                                                                                                                                                                                     |
| Gallbladder               | C239                                                                                                                                                                                                                                                                                                                                                                                                                                                                                                                                                                                                                                              |
| Liver*                    | C220 and C221                                                                                                                                                                                                                                                                                                                                                                                                                                                                                                                                                                                                                                     |
| Lung                      | C340-C349; excluding 9050-9055, 9140, 9590-9992                                                                                                                                                                                                                                                                                                                                                                                                                                                                                                                                                                                                   |
| Kidney                    | C649 and C659                                                                                                                                                                                                                                                                                                                                                                                                                                                                                                                                                                                                                                     |
| Small intestine           | C170-179                                                                                                                                                                                                                                                                                                                                                                                                                                                                                                                                                                                                                                          |
| Gastric cardia            | C160                                                                                                                                                                                                                                                                                                                                                                                                                                                                                                                                                                                                                                              |
| Endometrial               | C540-C549 and C559                                                                                                                                                                                                                                                                                                                                                                                                                                                                                                                                                                                                                                |
| Esophageal squamous       | C150-159; histologies 8041,8070,8071,8072,8074                                                                                                                                                                                                                                                                                                                                                                                                                                                                                                                                                                                                    |
| Myeloid leukemia          | Any histology of 9840, 9861, 9865-9867, 9869, 9871-9874, 9895-9897, 9898, 9910-9911, 9920, 9891, 9863, 9875-9876, 9945-9946, 9860, 9930                                                                                                                                                                                                                                                                                                                                                                                                                                                                                                           |
| Myeloma                   | Histology 9731-9732, 9734                                                                                                                                                                                                                                                                                                                                                                                                                                                                                                                                                                                                                         |
| Colon                     | C180-C189, C260                                                                                                                                                                                                                                                                                                                                                                                                                                                                                                                                                                                                                                   |
| Head and neck             | C000-C009, C019-C119, C129-C140, C142-C148, C300-C301, C310-C329, C339-C349, C381-C384, C388, C390, C398, and C399                                                                                                                                                                                                                                                                                                                                                                                                                                                                                                                                |
| Rectum                    | C199, C209; excluding histologies 9050-9055, 9140, 9590-9992                                                                                                                                                                                                                                                                                                                                                                                                                                                                                                                                                                                      |
| Bladder                   | C670-C679                                                                                                                                                                                                                                                                                                                                                                                                                                                                                                                                                                                                                                         |
| Breast                    | C500-C509                                                                                                                                                                                                                                                                                                                                                                                                                                                                                                                                                                                                                                         |
| Non-Hodgkin's Lymphoma    | C024, C098, C099, C111, C142, C379, C422, C770-C779 & histologies of:<br>9590-9597, 9670-9671, 9673, 9675, 9678-9680, 9684, 9687-9691, 9695, 9698-9702, 9705, 9708-9709, 9712, 9714-9719, 9724-9729, 9735, 9737-9738, 9811-9818, 9823, 9827, 9837<br><br>All sites except C024, C098-C099, C111, C142, C379, C422, C770-C779 & histologies of:<br>9590-9597, 9670-9671, 9673, 9675, 9678-9680, 9684, 9687, 9688, 9689-9691, 9695, 9698-9702, 9705, 9708-9709, 9712, 9714-9719, 9724-9729, 9735, 9737, 9738<br><br>All sites except C024, C098-C099, C111, C142, C379, C420-C422, C424, C770-C779 & histologies of:<br>9811-9818, 9823, 9827, 9837 |
| Thyroid                   | C739                                                                                                                                                                                                                                                                                                                                                                                                                                                                                                                                                                                                                                              |
| Gastric non-cardia        | C161-169                                                                                                                                                                                                                                                                                                                                                                                                                                                                                                                                                                                                                                          |
| Soft tissue               | C380, C470-C479, C490-C499; excluding histologies 9050-9055, 9140, 9590-9992                                                                                                                                                                                                                                                                                                                                                                                                                                                                                                                                                                      |
| Pancreas                  | C250-C259; excluding histologies 9050-9055, 9140, 9590-9992                                                                                                                                                                                                                                                                                                                                                                                                                                                                                                                                                                                       |
| Lymphocytic leukemia      | Any histology of 9826, 9835-9836, 9820, 9832-9834, 9940. C420, C421, C424; histologies of 9811-9818, 9837, 9823                                                                                                                                                                                                                                                                                                                                                                                                                                                                                                                                   |
| Ovary                     | C569                                                                                                                                                                                                                                                                                                                                                                                                                                                                                                                                                                                                                                              |
| Brain                     | C710-C719                                                                                                                                                                                                                                                                                                                                                                                                                                                                                                                                                                                                                                         |
| Prostate‡                 | C619                                                                                                                                                                                                                                                                                                                                                                                                                                                                                                                                                                                                                                              |
| Malignant melanoma        | C440-C449; histologies 8720-8790                                                                                                                                                                                                                                                                                                                                                                                                                                                                                                                                                                                                                  |

\* A small proportion (17%) of the liver cancer classification consists of intrahepatic bile duct cancer cases

† A small proportion (9%) of the kidney cancer classification consists of renal pelvis cancer cases

‡ Advanced prostate cancer cases were defined as cases with clinical or pathologic tumor classifications of T3 or T4, N1 status, or M1 status, or as cases first identified by stage cancer registry and who subsequently died of prostate cancer between 1995 and December 31, 2006.

**eTable 4.** Number of cohorts and cases excluded due to insufficient case numbers in cohort, by cancer type

| <b>Cancer</b>             | <b>N of excluded cohorts</b> | <b>N of excluded cases</b> |
|---------------------------|------------------------------|----------------------------|
| Esophageal adenocarcinoma | 7                            | 16                         |
| Gallbladder               | 6                            | 42                         |
| Liver                     | 2                            | 11                         |
| Lung                      | 0                            | 0                          |
| Kidney                    | 1                            | 4                          |
| Small intestine           | 5                            | 37                         |
| Gastric cardia            | 6                            | 9                          |
| Endometrial               | 1                            | 10                         |
| Esophageal squamous       | 6                            | 16                         |
| Myeloid leukemia          | 2                            | 23                         |
| Myeloma                   | 3                            | 27                         |
| Colon                     | 0                            | 0                          |
| Head and neck             | 1                            | 8                          |
| Rectum                    | 0                            | 0                          |
| Bladder                   | 0                            | 0                          |
| Breast                    | 0                            | 0                          |
| Non-Hodgkin lymphoma      | 1                            | 13                         |
| Thyroid                   | 1                            | 8                          |
| Gastric non-cardia        | 5                            | 7                          |
| Soft tissue               | 2                            | 11                         |
| Pancreas                  | 2                            | 20                         |
| Lymphocytic leukemia      | 2                            | 18                         |
| Ovary                     | 1                            | 4                          |
| Brain                     | 2                            | 3                          |
| Prostate                  | 0                            | 0                          |
| Malignant melanoma        | 0                            | 0                          |

**eTable 5.** Prevalence of demographic and lifestyle characteristics by leisure time physical activity quintile

| Characteristics by gender | Category               | Participants | 0-19.9% | 20-39.9% | 40-59.9% | 60-79.9% | 80%+    |
|---------------------------|------------------------|--------------|---------|----------|----------|----------|---------|
| <b>Males (n)</b>          |                        | 619,956      | 77,568  | 155,080  | 106,162  | 149,891  | 131,255 |
| <b>Age</b>                | <60                    | 286,282      | 41%     | 56%      | 43%      | 44%      | 44%     |
|                           | 60-69.9                | 290,403      | 52%     | 38%      | 50%      | 50%      | 49%     |
|                           | 70+                    | 43,271       | 8%      | 6%       | 7%       | 6%       | 8%      |
| <b>Smoking</b>            | Never                  | 199,102      | 27%     | 31%      | 32%      | 34%      | 34%     |
|                           | Former                 | 310,706      | 51%     | 45%      | 52%      | 53%      | 52%     |
|                           | Current                | 95,954       | 19%     | 23%      | 13%      | 11%      | 11%     |
| <b>Alcohol intake</b>     | 0                      | 102,336      | 23%     | 14%      | 17%      | 15%      | 17%     |
|                           | >0                     | 507,767      | 75%     | 84%      | 82%      | 83%      | 82%     |
| <b>Education</b>          | < High School          | 100,437      | 18%     | 26%      | 14%      | 10%      | 12%     |
|                           | High School Grad / GED | 89,175       | 20%     | 13%      | 15%      | 13%      | 14%     |
|                           | Post High School       | 70,590       | 9%      | 14%      | 9%       | 11%      | 12%     |
|                           | Some College           | 88,371       | 18%     | 10%      | 17%      | 15%      | 14%     |
|                           | College Graduate       | 133,920      | 16%     | 20%      | 23%      | 24%      | 24%     |
|                           | Graduate School        | 123,168      | 18%     | 14%      | 20%      | 25%      | 22%     |
| <b>BMI</b>                | <25.0                  | 201,979      | 28%     | 29%      | 30%      | 35%      | 39%     |
|                           | 25-29.9                | 297,110      | 44%     | 49%      | 49%      | 49%      | 47%     |
|                           | 30+                    | 110,717      | 26%     | 21%      | 19%      | 15%      | 12%     |
| <b>Race</b>               | White                  | 587,993      | 92%     | 96%      | 95%      | 94%      | 95%     |
|                           | Black                  | 11,117       | 3%      | 1%       | 2%       | 2%       | 2%      |
|                           | Other                  | 8,975        | 2%      | 1%       | 1%       | 2%       | 2%      |

| Characteristics by gender | Category               | Participants | 0-19.9% | 20-39.9% | 40-59.9% | 60-79.9% | 80%+    |
|---------------------------|------------------------|--------------|---------|----------|----------|----------|---------|
| <b>Females (n)</b>        |                        | 816,668      | 92,721  | 257,792  | 117,383  | 197,183  | 151,589 |
| <b>Age</b>                | <60                    | 487,604      | 48%     | 64%      | 56%      | 61%      | 60%     |
|                           | 60-69.9                | 284,760      | 46%     | 30%      | 40%      | 34%      | 35%     |
|                           | 70+                    | 44,304       | 6%      | 6%       | 4%       | 5%       | 5%      |
| <b>Smoking status</b>     | Never                  | 438,174      | 46%     | 57%      | 53%      | 54%      | 53%     |
|                           | Former                 | 240,473      | 32%     | 24%      | 32%      | 31%      | 32%     |
|                           | Current                | 122,962      | 20%     | 17%      | 13%      | 13%      | 13%     |
| <b>Alcohol</b>            | 0                      | 216,764      | 36%     | 28%      | 28%      | 21%      | 23%     |
|                           | >0                     | 587,331      | 62%     | 70%      | 70%      | 78%      | 75%     |
| <b>Education</b>          | < High School          | 149,634      | 16%     | 28%      | 10%      | 15%      | 14%     |
|                           | High School Grad / GED | 188,090      | 25%     | 23%      | 23%      | 23%      | 22%     |
|                           | Post High School       | 135,493      | 16%     | 16%      | 17%      | 17%      | 17%     |
|                           | Some College           | 97,875       | 17%     | 9%       | 17%      | 11%      | 12%     |
|                           | College Graduate       | 155,110      | 13%     | 17%      | 18%      | 23%      | 23%     |
|                           | Graduate School        | 62,164       | 9%      | 5%       | 11%      | 8%       | 8%      |
| <b>BMI</b>                | <25.0                  | 417,763      | 38%     | 46%      | 49%      | 58%      | 62%     |
|                           | 25-29.9                | 248,405      | 31%     | 33%      | 32%      | 29%      | 27%     |
|                           | 30+                    | 135,803      | 29%     | 20%      | 17%      | 12%      | 10%     |
| <b>Race</b>               | White                  | 782,257      | 92%     | 97%      | 94%      | 96%      | 96%     |
|                           | Black                  | 17,703       | 4%      | 1%       | 3%       | 2%       | 2%      |
|                           | Other                  | 8,343        | 1%      | 1%       | 1%       | 1%       | 1%      |

**eTable 6.** Leisure time physical activity and hazard ratios\* of cancer: impact of omitting each cohort in turn from the analysis

| Cancer                    | Omitted study†   |                  |                  |                  |                  |                  |                  |
|---------------------------|------------------|------------------|------------------|------------------|------------------|------------------|------------------|
|                           | None omitted     | AARP             | BCDDP            | COSM             | CPSII            | EPIC             | IWHS             |
| Esophageal adenocarcinoma | 0.58 (0.37–0.89) | 0.48 (0.24-0.95) | N/A              | 0.73 (0.60-0.89) | 0.49 (0.26-0.93) | 0.52 (0.29-0.92) | N/A              |
| Gallbladder               | 0.72 (0.51–1.01) | 0.84 (0.58-1.21) | N/A              | N/A              | 0.71 (0.46-1.09) | 0.70 (0.46-1.06) | 0.64 (0.46-0.88) |
| Liver                     | 0.73 (0.55–0.98) | 0.80 (0.58-1.10) | 0.70 (0.52-0.93) | 0.78 (0.57-1.06) | 0.67 (0.51-0.90) | 0.79 (0.56-1.11) | 0.70 (0.52-0.94) |
| Lung                      | 0.74 (0.71–0.77) | 0.74 (0.70-0.79) | 0.74 (0.71-0.78) | 0.74 (0.71-0.78) | 0.73 (0.70-0.77) | 0.75 (0.72-0.78) | 0.74 (0.71-0.78) |
| Kidney                    | 0.77 (0.70–0.85) | 0.78 (0.68-0.89) | 0.77 (0.70-0.84) | 0.76 (0.69-0.83) | 0.77 (0.69-0.87) | 0.76 (0.68-0.85) | 0.77 (0.69-0.86) |
| Small intestine           | 0.78 (0.60–1.00) | 0.93 (0.65-1.33) | N/A              | 0.76 (0.58-0.98) | 0.75 (0.57-0.99) | 0.76 (0.58-1.01) | 0.77 (0.59-1.00) |
| Gastric cardia            | 0.78 (0.64–0.95) | 0.83 (0.61-1.13) | N/A              | 0.78 (0.63-0.96) | 0.75 (0.61-0.94) | 0.77 (0.62-0.97) | 0.78 (0.64-0.96) |
| Endometrial               | 0.79 (0.68–0.92) | 0.85 (0.76-0.95) | 0.78 (0.66-0.92) | N/A              | 0.79 (0.66-0.94) | 0.74 (0.66-0.84) | 0.79 (0.66-0.95) |
| Esophageal squamous       | 0.80 (0.61–1.06) | 0.77 (0.52-1.13) | N/A              | 0.83 (0.63-1.10) | 0.79 (0.58-1.06) | 0.84 (0.61-1.17) | 0.79 (0.60-1.05) |
| Myeloid leukemia          | 0.80 (0.70–0.92) | 0.80 (0.66-0.96) | 0.81 (0.70-0.93) | 0.79 (0.69-0.91) | 0.80 (0.68-0.93) | 0.80 (0.69-0.93) | 0.80 (0.70-0.93) |
| Myeloma                   | 0.83 (0.72–0.95) | 0.76 (0.64-0.89) | N/A              | 0.81 (0.69-0.95) | 0.80 (0.67-0.96) | 0.83 (0.70-0.98) | 0.83 (0.72-0.97) |
| Colon                     | 0.84 (0.77–0.91) | 0.86 (0.79-0.93) | 0.82 (0.76-0.90) | 0.84 (0.77-0.93) | 0.84 (0.76-0.92) | 0.85 (0.77-0.94) | 0.85 (0.78-0.94) |
| Head and neck             | 0.85 (0.78–0.93) | 0.94 (0.82-1.07) | 0.86 (0.78-0.95) | 0.87 (0.78-0.97) | 0.83 (0.75-0.92) | 0.88 (0.78-0.99) | 0.87 (0.78-0.97) |
| Rectum                    | 0.87 (0.80–0.95) | 0.89 (0.79-1.00) | 0.87 (0.79-0.96) | 0.87 (0.79-0.96) | 0.87 (0.78-0.96) | 0.89 (0.79-0.99) | 0.88 (0.80-0.97) |
| Bladder                   | 0.87 (0.82–0.92) | 0.87 (0.80-0.95) | 0.87 (0.82-0.92) | 0.86 (0.81-0.92) | 0.87 (0.82-0.93) | 0.88 (0.83-0.94) | 0.87 (0.82-0.93) |
| Breast                    | 0.90 (0.87–0.93) | 0.90 (0.86-0.94) | 0.90 (0.87-0.93) | N/A              | 0.90 (0.86-0.94) | 0.88 (0.85-0.92) | 0.90 (0.87-0.94) |
| Non-Hodgkin lymphoma      | 0.91 (0.83–1.00) | 0.90 (0.80-1.02) | 0.90 (0.84-0.97) | 0.90 (0.83-0.98) | 0.92 (0.81-1.03) | 0.92 (0.83-1.03) | 0.92 (0.83-1.02) |
| Thyroid                   | 0.92 (0.81–1.06) | 0.88 (0.75-1.05) | 0.93 (0.81-1.07) | 0.93 (0.80-1.07) | 0.94 (0.81-1.09) | 0.94 (0.79-1.11) | 0.90 (0.78-1.03) |
| Gastric non-cardia        | 0.93 (0.73–1.19) | 1.01 (0.73-1.39) | N/A              | 0.91 (0.70-1.18) | 0.82 (0.67-0.99) | 1.02 (0.76-1.36) | 0.94 (0.72-1.23) |
| Soft tissue               | 0.94 (0.67–1.31) | 0.92 (0.60-1.40) | N/A              | 0.91 (0.63-1.31) | 0.89 (0.61-1.30) | 0.93 (0.62-1.38) | 0.99 (0.70-1.39) |
| Pancreas                  | 0.95 (0.83–1.08) | 0.97 (0.82-1.15) | 0.92 (0.82-1.04) | 0.92 (0.82-1.02) | 0.94 (0.81-1.10) | 0.97 (0.83-1.13) | 0.94 (0.82-1.09) |
| Lymphocytic leukemia      | 0.98 (0.87–1.11) | 0.99 (0.84-1.16) | N/A              | 0.99 (0.87-1.12) | 0.96 (0.84-1.11) | 0.98 (0.86-1.12) | 0.98 (0.86-1.11) |
| Ovary                     | 1.01 (0.91–1.13) | 1.03 (0.91-1.17) | 1.01 (0.90-1.13) | N/A              | 1.00 (0.89-1.13) | 1.03 (0.91-1.17) | 1.00 (0.89-1.12) |
| Brain                     | 1.06 (0.93–1.20) | 1.11 (0.95-1.31) | N/A              | 1.07 (0.94-1.21) | 1.02 (0.89-1.17) | 1.08 (0.92-1.28) | 1.05 (0.91-1.21) |
| Prostate                  | 1.05 (1.03–1.08) | 1.04 (1.00-1.08) | N/A              | 1.06 (1.03-1.09) | 1.06 (1.02-1.09) | 1.06 (1.03-1.09) | N/A              |
| Malignant melanoma        | 1.27 (1.16–1.40) | 1.28 (1.14-1.44) | 1.27 (1.14-1.40) | 1.25 (1.14-1.37) | 1.27 (1.13-1.42) | 1.24 (1.13-1.36) | 1.29 (1.16-1.42) |

**Omitted study†**

| <b>Cancer</b>             | <b>None omitted</b> | <b>PHS</b>       | <b>PLCO</b>      | <b>SMC</b>       | <b>USRT</b>      | <b>WHS</b>       | <b>WLH</b>       |
|---------------------------|---------------------|------------------|------------------|------------------|------------------|------------------|------------------|
| Esophageal adenocarcinoma | 0.58 (0.37–0.89)    | N/A              | 0.56 (0.34-0.94) | N/A              | N/A              | N/A              | N/A              |
| Gallbladder               | 0.72 (0.51–1.01)    | N/A              | 0.75 (0.55-1.02) | 0.71 (0.47-1.07) | N/A              | N/A              | N/A              |
| Liver                     | 0.73 (0.55–0.98)    | 0.74 (0.54-1.01) | 0.76 (0.55-1.05) | 0.69 (0.53-0.90) | N/A              | 0.74 (0.55-1.01) | N/A              |
| Lung                      | 0.74 (0.71–0.77)    | 0.74 (0.71-0.78) | 0.74 (0.71-0.78) | 0.74 (0.71-0.77) | 0.74 (0.71-0.78) | 0.74 (0.71-0.77) | 0.74 (0.71-0.78) |
| Kidney                    | 0.77 (0.70–0.85)    | 0.77 (0.69-0.86) | 0.78 (0.70-0.86) | 0.78 (0.70-0.86) | 0.78 (0.71-0.85) | 0.77 (0.70-0.86) | N/A              |
| Small intestine           | 0.78 (0.60–1.00)    | 0.78 (0.60-1.01) | 0.76 (0.58-0.98) | N/A              | N/A              | N/A              | N/A              |
| Gastric cardia            | 0.78 (0.64–0.95)    | N/A              | 0.77 (0.63-0.95) | N/A              | N/A              | N/A              | N/A              |
| Endometrial               | 0.79 (0.68–0.92)    | N/A              | 0.80 (0.68-0.95) | 0.79 (0.67-0.94) | 0.79 (0.67-0.94) | 0.78 (0.66-0.93) | N/A              |
| Esophageal squamous       | 0.80 (0.61–1.06)    | N/A              | 0.80 (0.60-1.06) | N/A              | N/A              | N/A              | N/A              |
| Myeloid leukemia          | 0.80 (0.70–0.92)    | 0.80 (0.70-0.92) | 0.82 (0.71-0.94) | 0.80 (0.69-0.92) | N/A              | 0.79 (0.69-0.91) | N/A              |
| Myeloma                   | 0.83 (0.72–0.95)    | N/A              | 0.88 (0.77-1.00) | 0.81 (0.70-0.95) | 0.82 (0.70-0.96) | 0.83 (0.71-0.96) | N/A              |
| Colon                     | 0.84 (0.77–0.91)    | 0.85 (0.78-0.93) | 0.82 (0.75-0.89) | 0.83 (0.76-0.90) | 0.84 (0.77-0.92) | 0.84 (0.76-0.92) | 0.83 (0.76-0.90) |
| Head and neck             | 0.85 (0.78–0.93)    | 0.86 (0.77-0.95) | 0.86 (0.77-0.95) | 0.86 (0.78-0.96) | 0.84 (0.77-0.92) | 0.85 (0.77-0.93) | N/A              |
| Rectum                    | 0.87 (0.80–0.95)    | 0.85 (0.79-0.92) | 0.87 (0.79-0.96) | 0.87 (0.79-0.96) | 0.86 (0.79-0.93) | 0.87 (0.80-0.96) | 0.86 (0.79-0.93) |
| Bladder                   | 0.87 (0.82–0.92)    | 0.87 (0.82-0.92) | 0.87 (0.82-0.93) | 0.87 (0.82-0.92) | 0.87 (0.82-0.93) | 0.87 (0.82-0.92) | 0.87 (0.82-0.92) |
| Breast                    | 0.90 (0.87–0.93)    | N/A              | 0.91 (0.88-0.94) | 0.90 (0.87-0.94) | 0.90 (0.86-0.94) | 0.90 (0.87-0.94) | 0.90 (0.86-0.93) |
| Non–Hodgkin lymphoma      | 0.91 (0.83–1.00)    | 0.91 (0.82-1.01) | 0.90 (0.81-1.00) | 0.91 (0.82-1.01) | 0.91 (0.83-1.01) | 0.93 (0.85-1.01) | N/A              |
| Thyroid                   | 0.92 (0.81–1.06)    | 0.94 (0.82-1.08) | 0.91 (0.79-1.05) | 0.93 (0.80-1.07) | 0.92 (0.79-1.07) | 0.93 (0.80-1.08) | N/A              |
| Gastric non–cardia        | 0.93 (0.73–1.19)    | N/A              | 0.97 (0.73-1.27) | 0.88 (0.70-1.11) | N/A              | N/A              | N/A              |
| Soft tissue               | 0.94 (0.67–1.31)    | 0.91 (0.63-1.31) | 0.96 (0.67-1.37) | 0.98 (0.70-1.38) | 0.88 (0.67-1.16) | 1.02 (0.77-1.34) | N/A              |
| Pancreas                  | 0.95 (0.83–1.08)    | 0.96 (0.85-1.09) | 0.96 (0.83-1.11) | 0.93 (0.82-1.05) | N/A              | 0.96 (0.84-1.10) | N/A              |
| Lymphocytic leukemia      | 0.98 (0.87–1.11)    | 0.98 (0.86-1.10) | 0.97 (0.85-1.10) | 0.98 (0.87-1.11) | 0.98 (0.87-1.11) | 0.98 (0.87-1.11) | N/A              |
| Ovary                     | 1.01 (0.91–1.13)    | N/A              | 1.01 (0.90-1.13) | 1.01 (0.90-1.13) | 1.01 (0.91-1.13) | 1.03 (0.92-1.15) | N/A              |
| Brain                     | 1.06 (0.93–1.20)    | 1.03 (0.90-1.17) | 1.04 (0.91-1.20) | 1.06 (0.94-1.21) | N/A              | 1.07 (0.93-1.23) | 1.05 (0.92-1.19) |
| Prostate                  | 1.05 (1.03–1.08)    | 1.06 (1.03-1.09) | 1.05 (1.02-1.08) | N/A              | 1.05 (1.03-1.08) | N/A              | N/A              |
| Malignant melanoma        | 1.27 (1.16–1.40)    | 1.28 (1.15-1.42) | 1.30 (1.18-1.43) | 1.27 (1.15-1.40) | 1.30 (1.18-1.43) | 1.25 (1.14-1.38) | 1.28 (1.17-1.41) |

\* Multivariable models were adjusted for age, gender, smoking status (never, former, current), alcohol consumption (0, 0.1-14.9, 15.0-29.9 and 30.0+ g/day), education (did not complete high school, completed high school, post high-school training, some college, completed college), and race/ethnicity (white, black, other). Models for endometrial, breast, and ovarian cancers are additionally adjusted for hormone replacement therapy use (ever, never), oral contraceptive use (ever, never), age at menarche (<10 years, 10-11 years, 12-13 years, 14+ years), age at menopause (premenopausal, 40-44 years, 45-49 years, 50-54 years, 55+ years), and parity (0 children, 1 child, 2 children, 3+ children)

† Abbreviations. AARP: NIH-AARP Diet and Health Study, BCDDP: Breast Cancer Detection and Demonstration Project, COSM: Cohort of Swedish Men, CPS II: Cancer Prevention Study II, EPIC: European Prospective Investigation into Cancer and Nutrition, IWHS: Iowa Women's Health Study, PHS: Physician's Health Study I and II, PLCO: Prostate, Lung, Colorectal and Ovarian Cancer Screening Trial, SMC: Swedish Mammography Cohort, USRT: U.S. Radiologic Technologists Cohort, WHS: Women's Health Study, WLH: Women's Lifestyle and Health Study

**eTable 7.** Comparison of summary hazard ratios (HRs)<sup>\*</sup> and 95% confidence intervals (CIs) in all studies and in only studies with a validated questionnaire (qx)

| Cancer <sup>†</sup>       | HR (95% CI)<br>all studies | HR (95% CI)<br>validated qx | Percent difference in<br>HR |
|---------------------------|----------------------------|-----------------------------|-----------------------------|
| Esophageal adenocarcinoma | 0.58 (0.37–0.89)           | 0.56 (0.34-0.94)            | -3.4                        |
| Gallbladder               | 0.72 (0.51–1.01)           | 0.75 (0.55-1.02)            | 4.2                         |
| Liver                     | 0.73 (0.55–0.98)           | 0.76 (0.55-1.05)            | 4.1                         |
| Lung                      | 0.74 (0.71–0.77)           | 0.74 (0.70-0.78)            | 0.0                         |
| Kidney                    | 0.77 (0.70–0.85)           | 0.78 (0.70-0.86)            | 1.3                         |
| Small intestine           | 0.78 (0.60–1.00)           | 0.76 (0.58-0.98)            | -2.6                        |
| Gastric cardia            | 0.78 (0.64–0.95)           | 0.77 (0.63-0.95)            | -1.3                        |
| Endometrial               | 0.79 (0.68–0.92)           | 0.80 (0.68-0.95)            | 1.3                         |
| Esophageal squamous       | 0.80 (0.61–1.06)           | 0.80 (0.60-1.06)            | 0.0                         |
| Myeloid leukemia          | 0.80 (0.70–0.92)           | 0.82 (0.71-0.94)            | 2.5                         |
| Myeloma                   | 0.83 (0.72–0.95)           | 0.88 (0.77-1.00)            | 6.0                         |
| Colon                     | 0.84 (0.77–0.91)           | 0.81 (0.75-0.88)            | -3.6                        |
| Head and neck             | 0.85 (0.78–0.93)           | 0.86 (0.77-0.95)            | 1.2                         |
| Rectum                    | 0.87 (0.80–0.95)           | 0.86 (0.79-0.93)            | -1.1                        |
| Bladder                   | 0.87 (0.82–0.92)           | 0.87 (0.82-0.93)            | 0.0                         |
| Breast                    | 0.90 (0.87–0.93)           | 0.90 (0.87-0.94)            | 0.0                         |
| Non-Hodgkin lymphoma      | 0.91 (0.83–1.00)           | 0.90 (0.81-1.00)            | -1.1                        |
| Thyroid                   | 0.92 (0.81–1.06)           | 0.91 (0.79-1.05)            | -1.1                        |
| Gastric non-cardia        | 0.93 (0.73–1.19)           | 0.97 (0.73-1.27)            | 4.3                         |
| Soft tissue               | 0.94 (0.67–1.31)           | 0.96 (0.67-1.37)            | 2.1                         |
| Pancreas                  | 0.95 (0.83–1.08)           | 0.96 (0.83-1.11)            | 1.1                         |
| Lymphocytic leukemia      | 0.98 (0.87–1.11)           | 0.97 (0.85-1.10)            | -1.0                        |
| Ovary                     | 1.01 (0.91–1.13)           | 1.01 (0.90-1.13)            | 0.0                         |
| Brain                     | 1.06 (0.93–1.20)           | 1.04 (0.91-1.19)            | -1.9                        |
| Prostate                  | 1.05 (1.03–1.08)           | 1.05 (1.02-1.08)            | 0.0                         |
| Malignant melanoma        | 1.27 (1.16–1.40)           | 1.31 (1.19-1.44)            | 3.1                         |

<sup>\*</sup> All models were adjusted for age, gender, smoking status (never, former, current), alcohol consumption (0, 0.1-14.9, 15.0-29.9 and 30.0+ g/day), education (did not complete high school, completed high school, post high-school training, some college, completed college), and race/ethnicity (white, black, other). Models for endometrial, breast, and ovarian cancers are additionally adjusted for postmenopausal hormone therapy use (ever, never), oral contraceptive use (ever, never), age at menarche (<10 years, 10-11 years, 12-13 years, 14+ years), age at menopause (premenopausal, 40-44 years, 45-49 years, 50-54 years, 55+ years), and parity (0 children, 1 child, 2 children, 3+ children)

<sup>†</sup> The Surveillance Epidemiology and End Results site recode and the *International Classification of Diseases for Oncology, Third Edition* code corresponding to each cancer type are shown in **eTable 3**



**eTable 8.** Comparison of hazard ratios (HRs) and 95% confidence intervals (CIs) in the NIH-AARP Diet and Health Study in models adjusted for standard risk factors and models additionally adjusted for diet

| Cancer *                  | HR (95% CI) standard adjusted <sup>†</sup> | HR (95% CI) diet adjusted <sup>‡</sup> | Percent difference in HR |
|---------------------------|--------------------------------------------|----------------------------------------|--------------------------|
| Esophageal adenocarcinoma | 0.74 (0.58-0.94)                           | 0.79 (0.62-1.01)                       | 7.1                      |
| Gallbladder               | 0.52 (0.31-0.85)                           | 0.51 (0.30-0.85)                       | -1.8                     |
| Liver                     | 0.52 (0.42-0.65)                           | 0.55 (0.43-0.69)                       | 5.0                      |
| Lung                      | 0.74 (0.70-0.78)                           | 0.77 (0.73-0.82)                       | 4.8                      |
| Kidney                    | 0.76 (0.67-0.85)                           | 0.79 (0.70-0.89)                       | 4.2                      |
| Small intestine           | 0.65 (0.45-0.93)                           | 0.66 (0.46-0.95)                       | 2.2                      |
| Gastric cardia            | 0.74 (0.57-0.97)                           | 0.76 (0.57-0.99)                       | 2.0                      |
| Endometrial               | 0.60 (0.52-0.69)                           | 0.61 (0.53-0.71)                       | 3.1                      |
| Esophageal squamous       | 0.85 (0.57-1.27)                           | 0.95 (0.63-1.43)                       | 12.2                     |
| Myeloid leukemia          | 0.81 (0.65-1.00)                           | 0.80 (0.64-0.99)                       | -1.3                     |
| Myeloma                   | 0.98 (0.81-1.18)                           | 0.98 (0.81-1.18)                       | 0.1                      |
| Colon                     | 0.73 (0.68-0.78)                           | 0.76 (0.70-0.82)                       | 4.2                      |
| Head and neck             | 0.78 (0.69-0.88)                           | 0.81 (0.71-0.91)                       | 3.2                      |
| Rectum                    | 0.84 (0.75-0.95)                           | 0.89 (0.78-1.00)                       | 5.4                      |
| Bladder                   | 0.87 (0.80-0.95)                           | 0.89 (0.82-0.97)                       | 2.3                      |
| Breast                    | 0.89 (0.84-0.94)                           | 0.91 (0.86-0.97)                       | 2.2                      |
| Non-Hodgkin lymphoma      | 0.95 (0.86-1.05)                           | 0.96 (0.86-1.07)                       | 1.2                      |
| Thyroid                   | 1.00 (0.80-1.27)                           | 0.97 (0.77-1.23)                       | -3.3                     |
| Gastric non-cardia        | 0.78 (0.61-0.99)                           | 0.77 (0.60-0.99)                       | -0.8                     |
| Soft tissue               | 0.94 (0.69-1.30)                           | 0.95 (0.68-1.30)                       | 0.1                      |
| Pancreas                  | 0.89 (0.78-1.02)                           | 0.90 (0.79-1.03)                       | 1.1                      |
| Lymphocytic leukemia      | 0.97 (0.80-1.17)                           | 1.00 (0.82-1.21)                       | 3.3                      |
| Ovary                     | 0.98 (0.79-1.20)                           | 0.99 (0.81-1.23)                       | 2.0                      |
| Brain                     | 0.96 (0.79-1.18)                           | 0.91 (0.74-1.12)                       | -5.9                     |
| Prostate                  | 1.07 (1.03-1.11)                           | 1.07 (1.03-1.11)                       | 0.2                      |
| Malignant melanoma        | 1.23 (1.13-1.33)                           | 1.23 (1.13-1.33)                       | 0.0                      |

\* The Surveillance Epidemiology and End Results site recode and the *International Classification of Diseases for Oncology, Third Edition* code corresponding to each cancer type are shown in **eTable 3**

<sup>†</sup> All models were adjusted for age, gender, smoking status (never, former, current), alcohol consumption (0, 0.1-14.9, 15.0-29.9 and 30.0+ g/day), education (did not complete high school, completed high school, post high-school training, some college, completed college), and race/ethnicity (white, black, other). Models for endometrial, breast, and ovarian cancers are additionally adjusted for postmenopausal hormone therapy use (ever, never), oral contraceptive use (ever, never), age at menarche (<10 years, 10-11 years, 12-13 years, 14+ years), age at menopause (premenopausal, 40-44 years, 45-49 years, 50-54 years, 55+ years), and parity (0 children, 1 child, 2 children, 3+ children)

<sup>‡</sup> Models adjusted for the covariates above and also for kilocalories consumed per day (continuous), multivitamin use during the past 12 months (yes, no), use of zinc, iron, selenium or folic acid (yes, no), use of Vitamin A, Beta-

carotene, vitamin C, vitamin E, or calcium (yes, no), and consumption of fruits (continuous My Pyramid servings per day), vegetables (continuous My Pyramid servings per day), and red meat (continuous My Pyramid servings per day).

**eFigure 1.** Association between leisure-time physical activity and cancer type, allowing for non-linear effects, with 95% confidence intervals

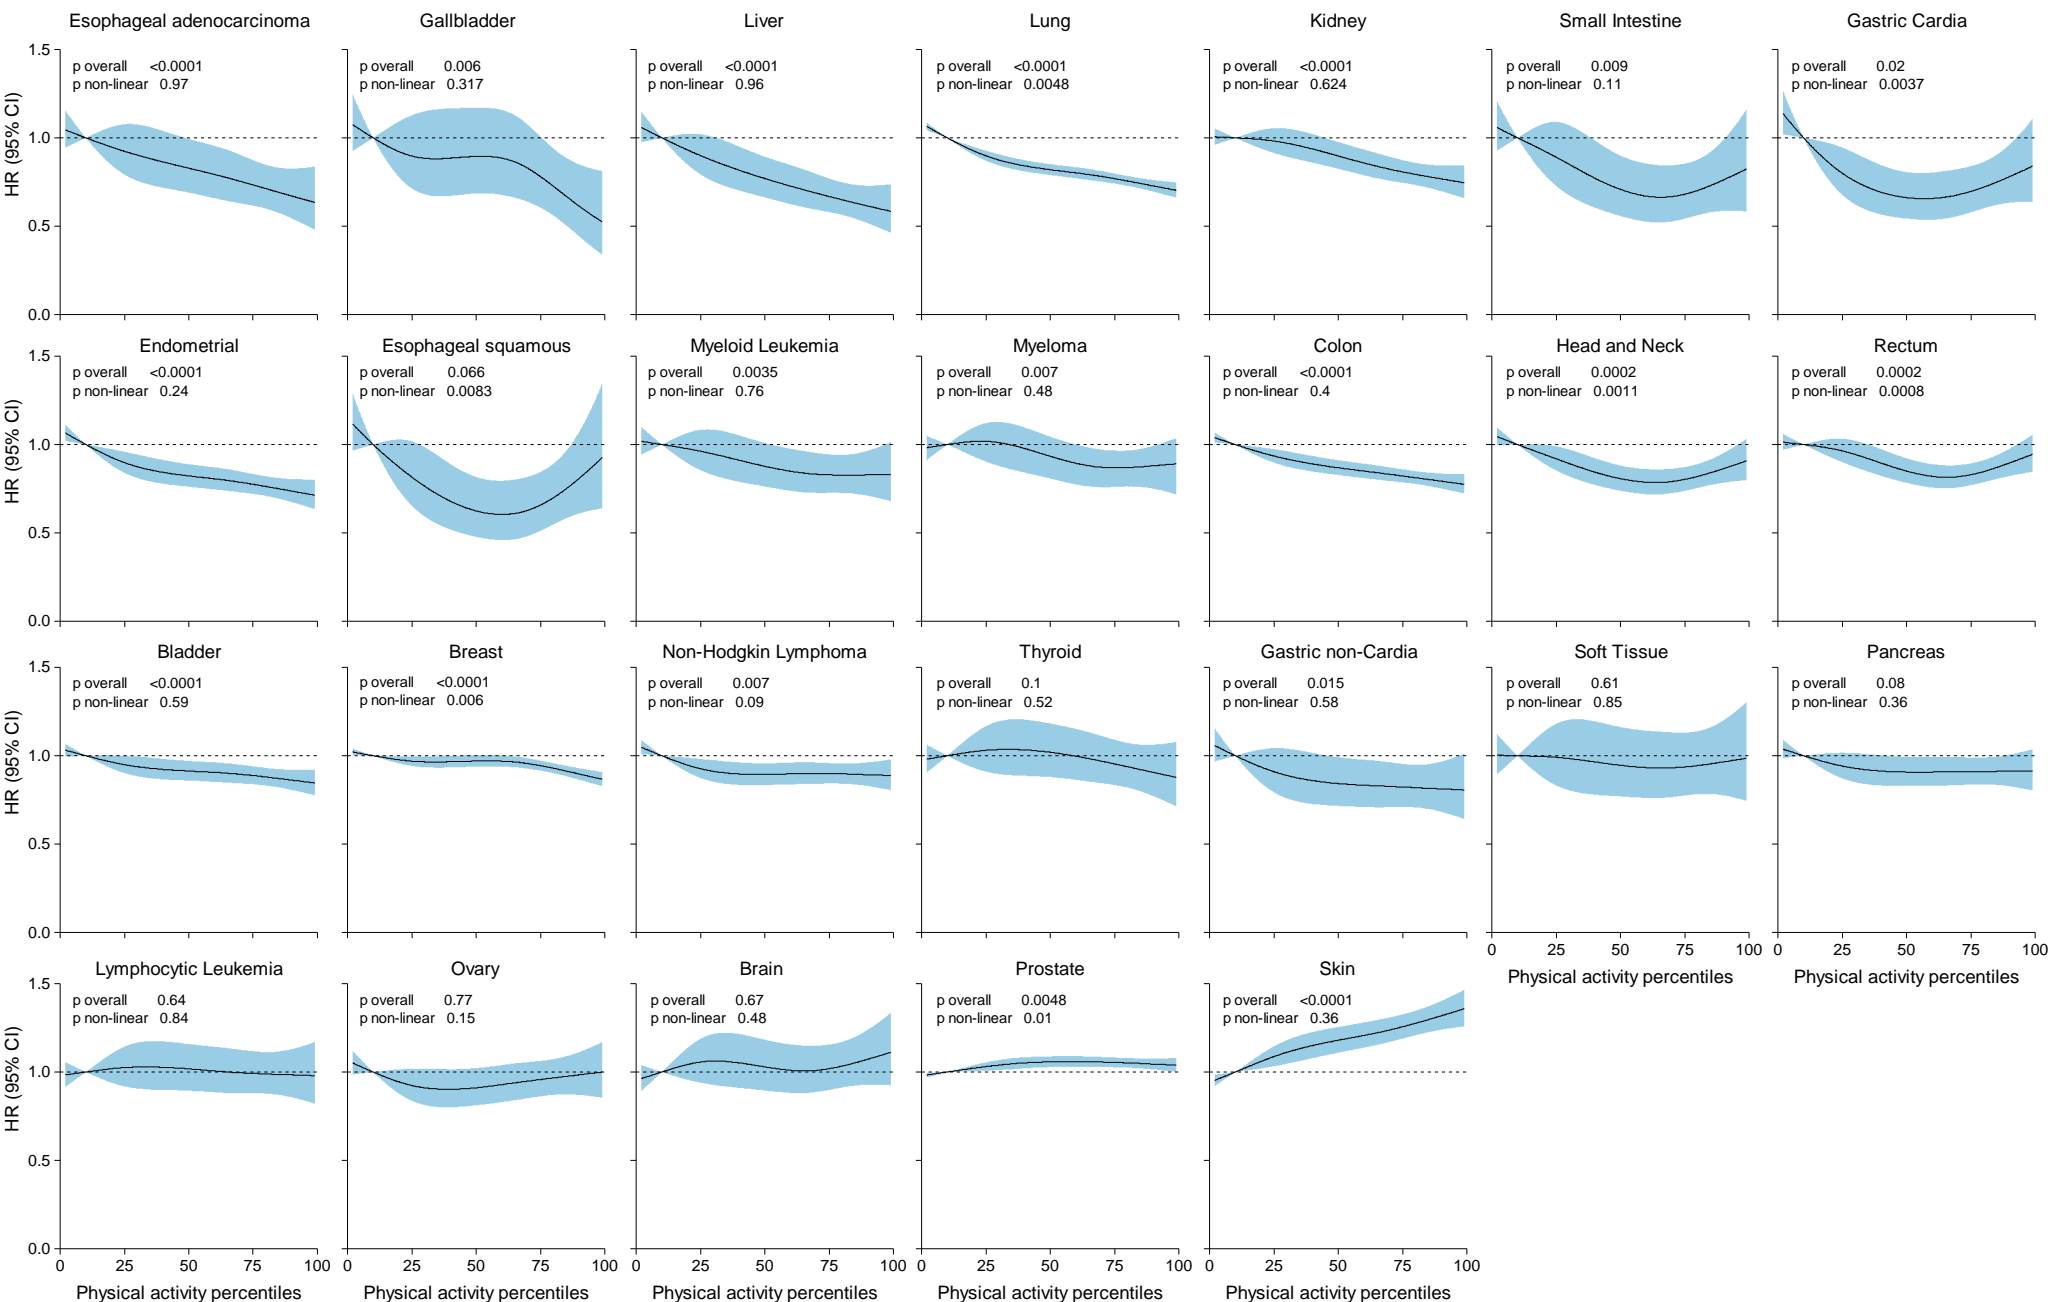

The reference level of leisure-time physical activity for these plots was the 10th percentile, with the HR fixed at 1.0 at this percentile. Separate models were fit for each cancer type using cubic restricted splines, stratified by cohort, and adjusted for age, gender, smoking status (never, former, current), alcohol consumption (0, 0.1-14.9, 15.0-29.9, and 30.0+ g/day), education (did not complete high school, completed high school, post high-school training, some college, completed college), and race/ethnicity (white, black, other). Models for endometrial, breast, and ovarian cancers are additionally adjusted for hormone replacement therapy (ever, never), oral contraceptive use (ever, never), age at menarche (<10 years, 10-11 years, 12-13 years, 14+ years), age at menopause (premenopausal, 40-44 years, 45-49 years, 50-54 years, 55+ years), and parity (0 children, 1 child, 2 children, 3+ children).

**eFigure 2a.** Physical activity and risk of esophageal adenocarcinoma

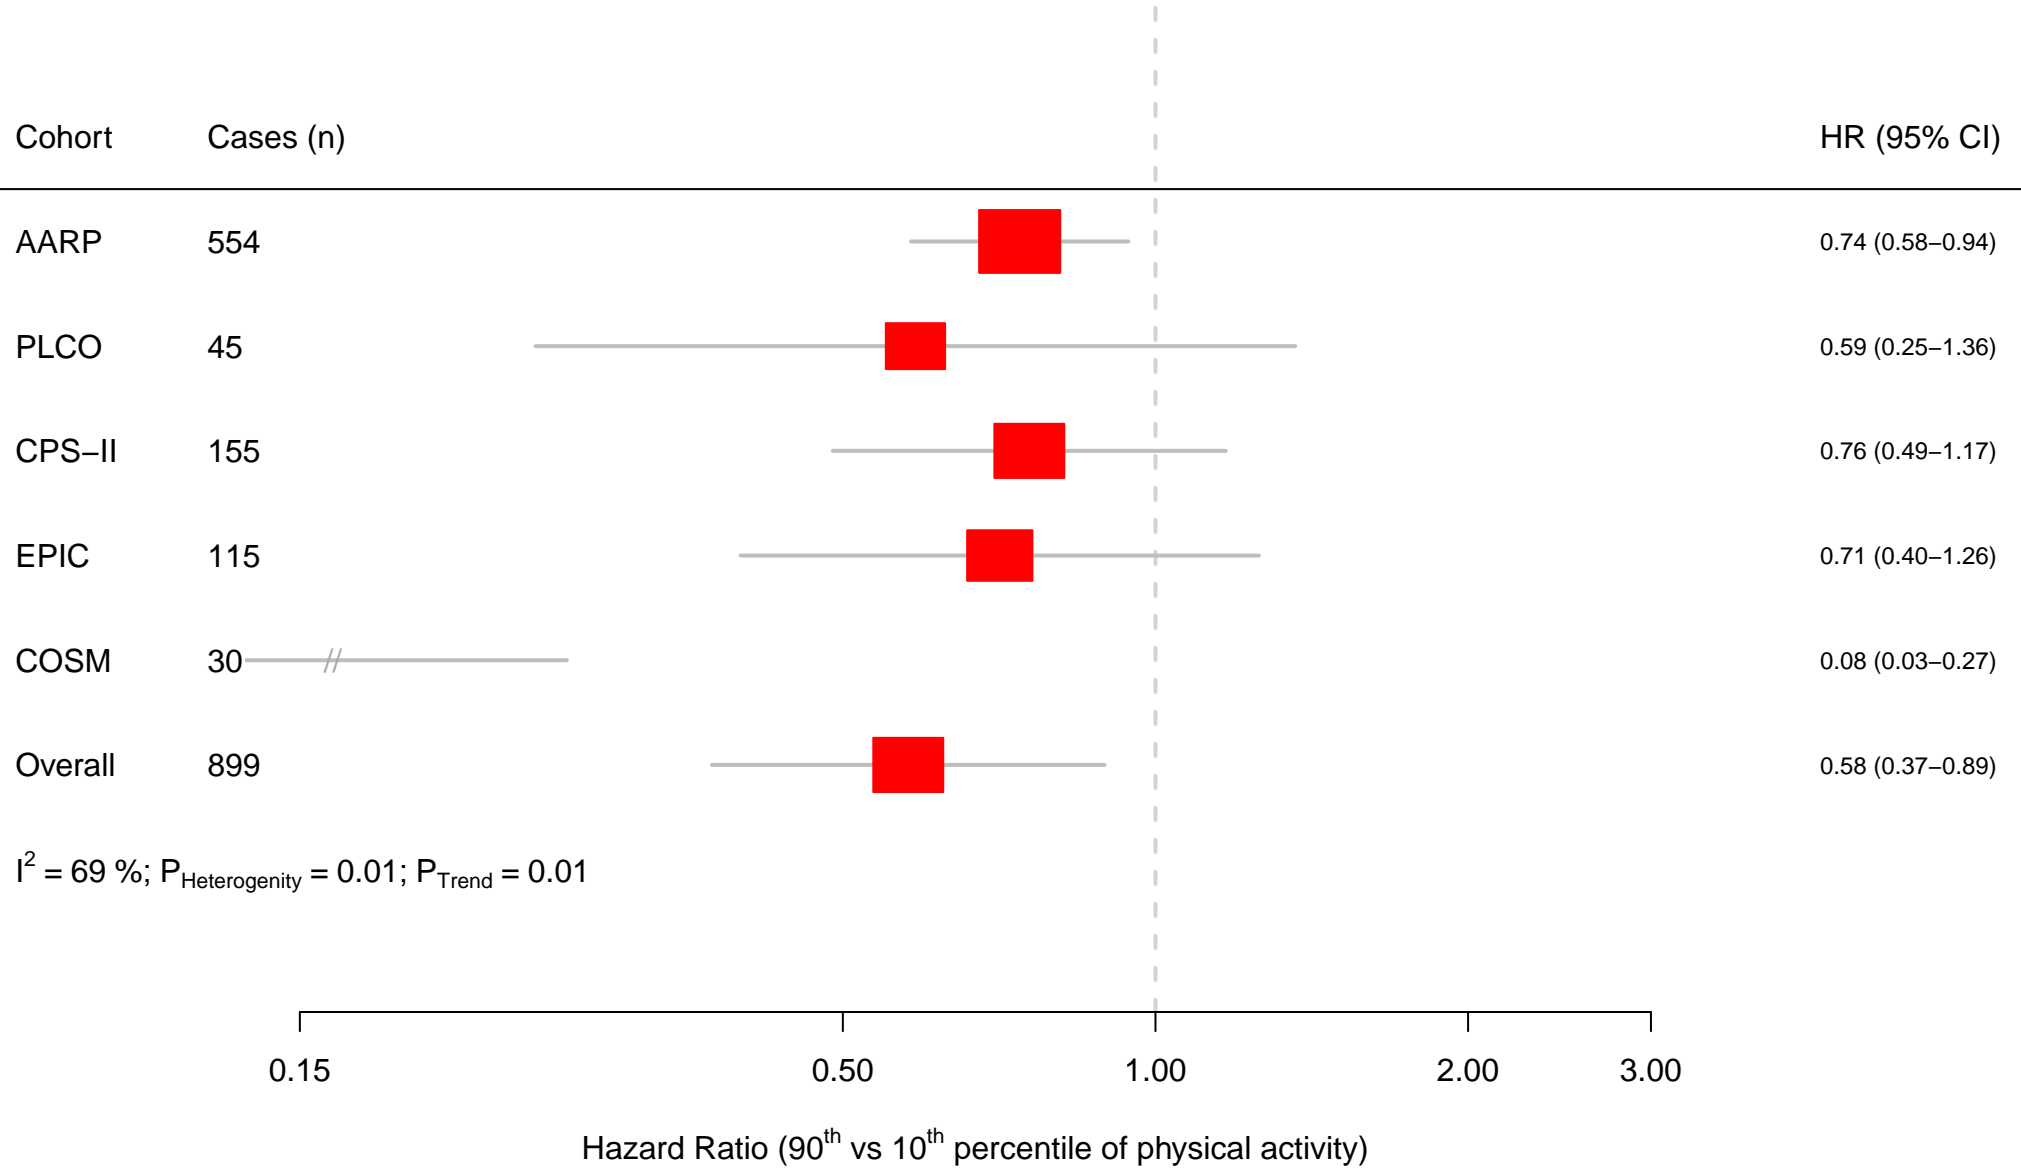

**eFigure 2b.** Physical activity and risk of gallbladder cancer

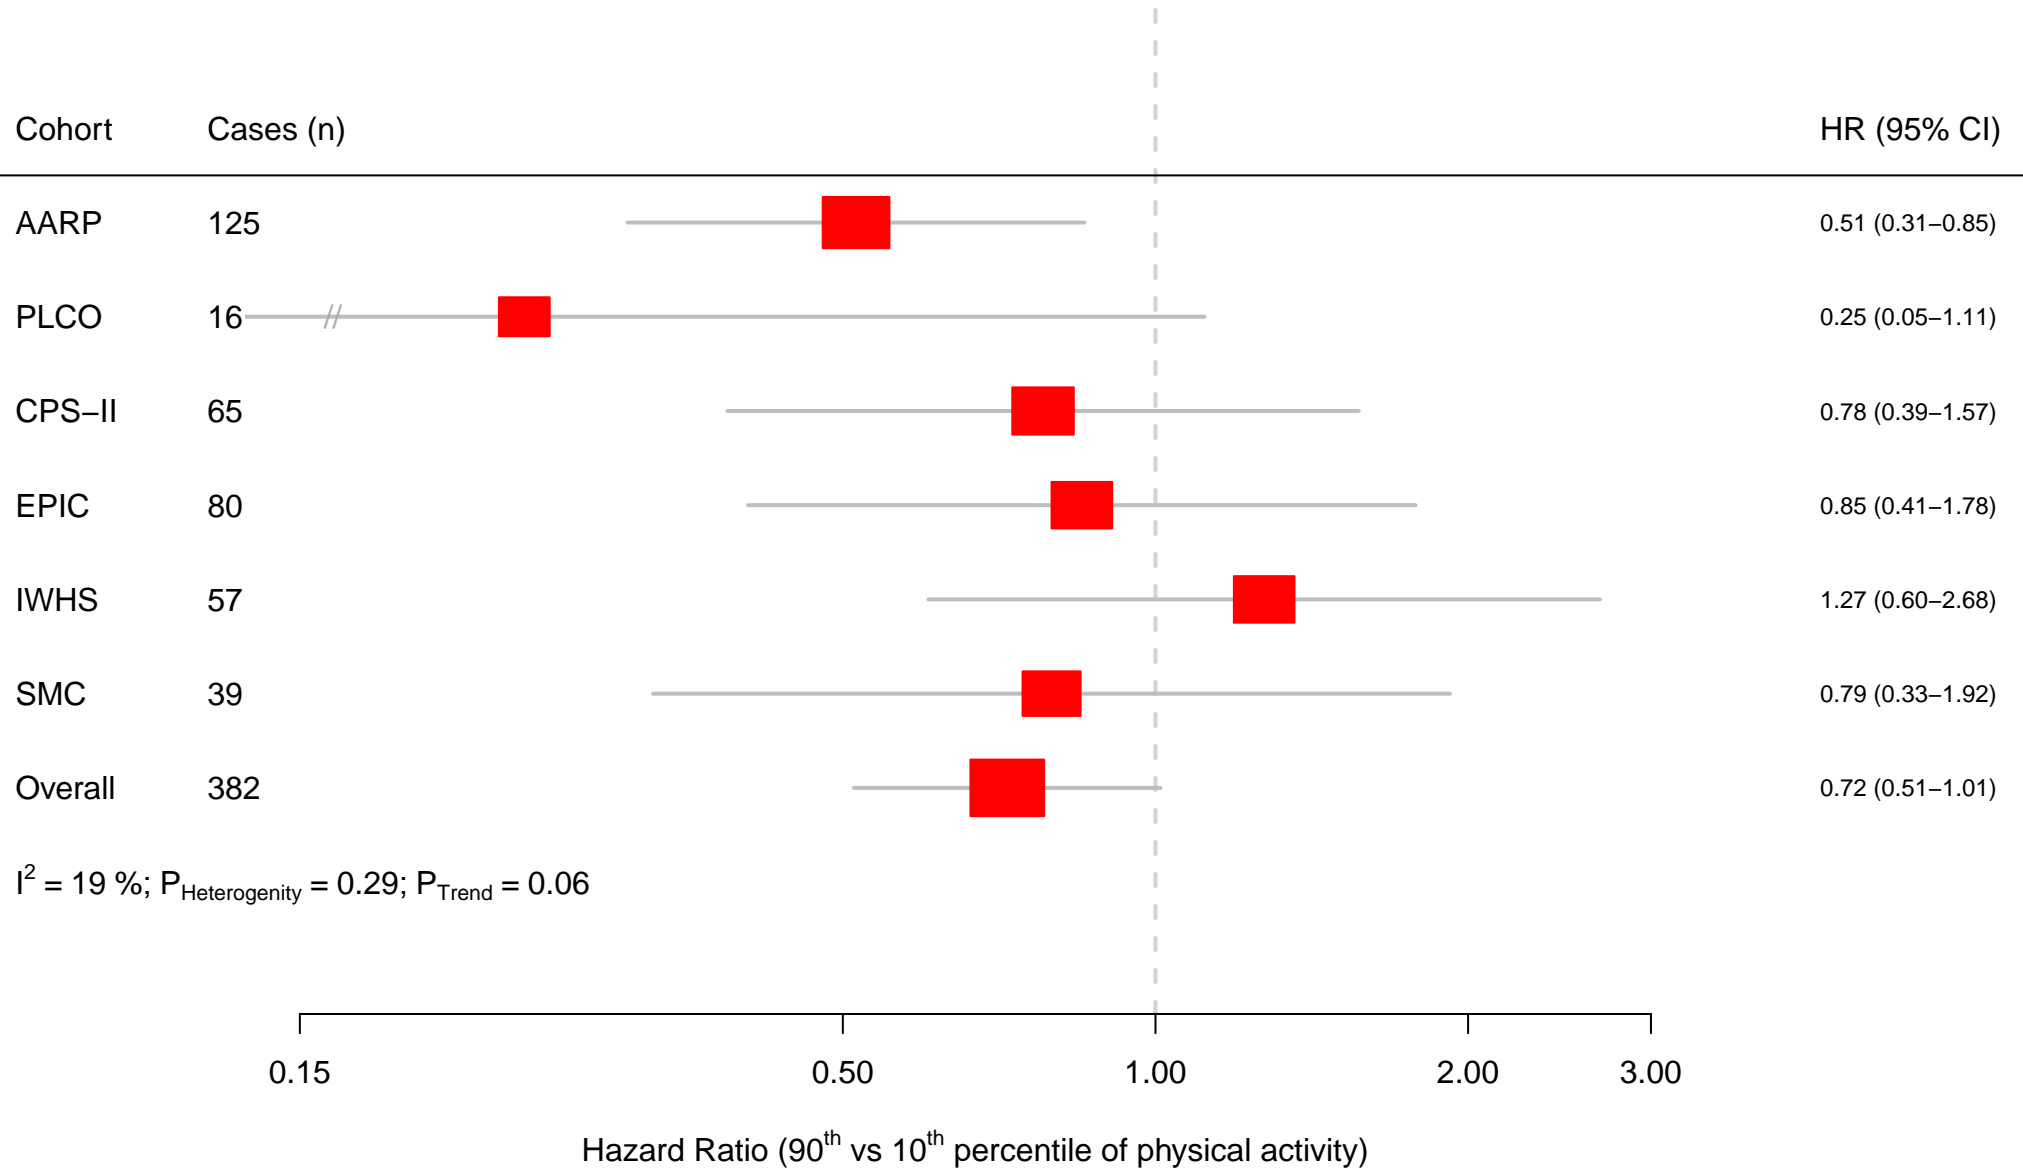

**eFigure 2c. Physical activity and risk of liver cancer**

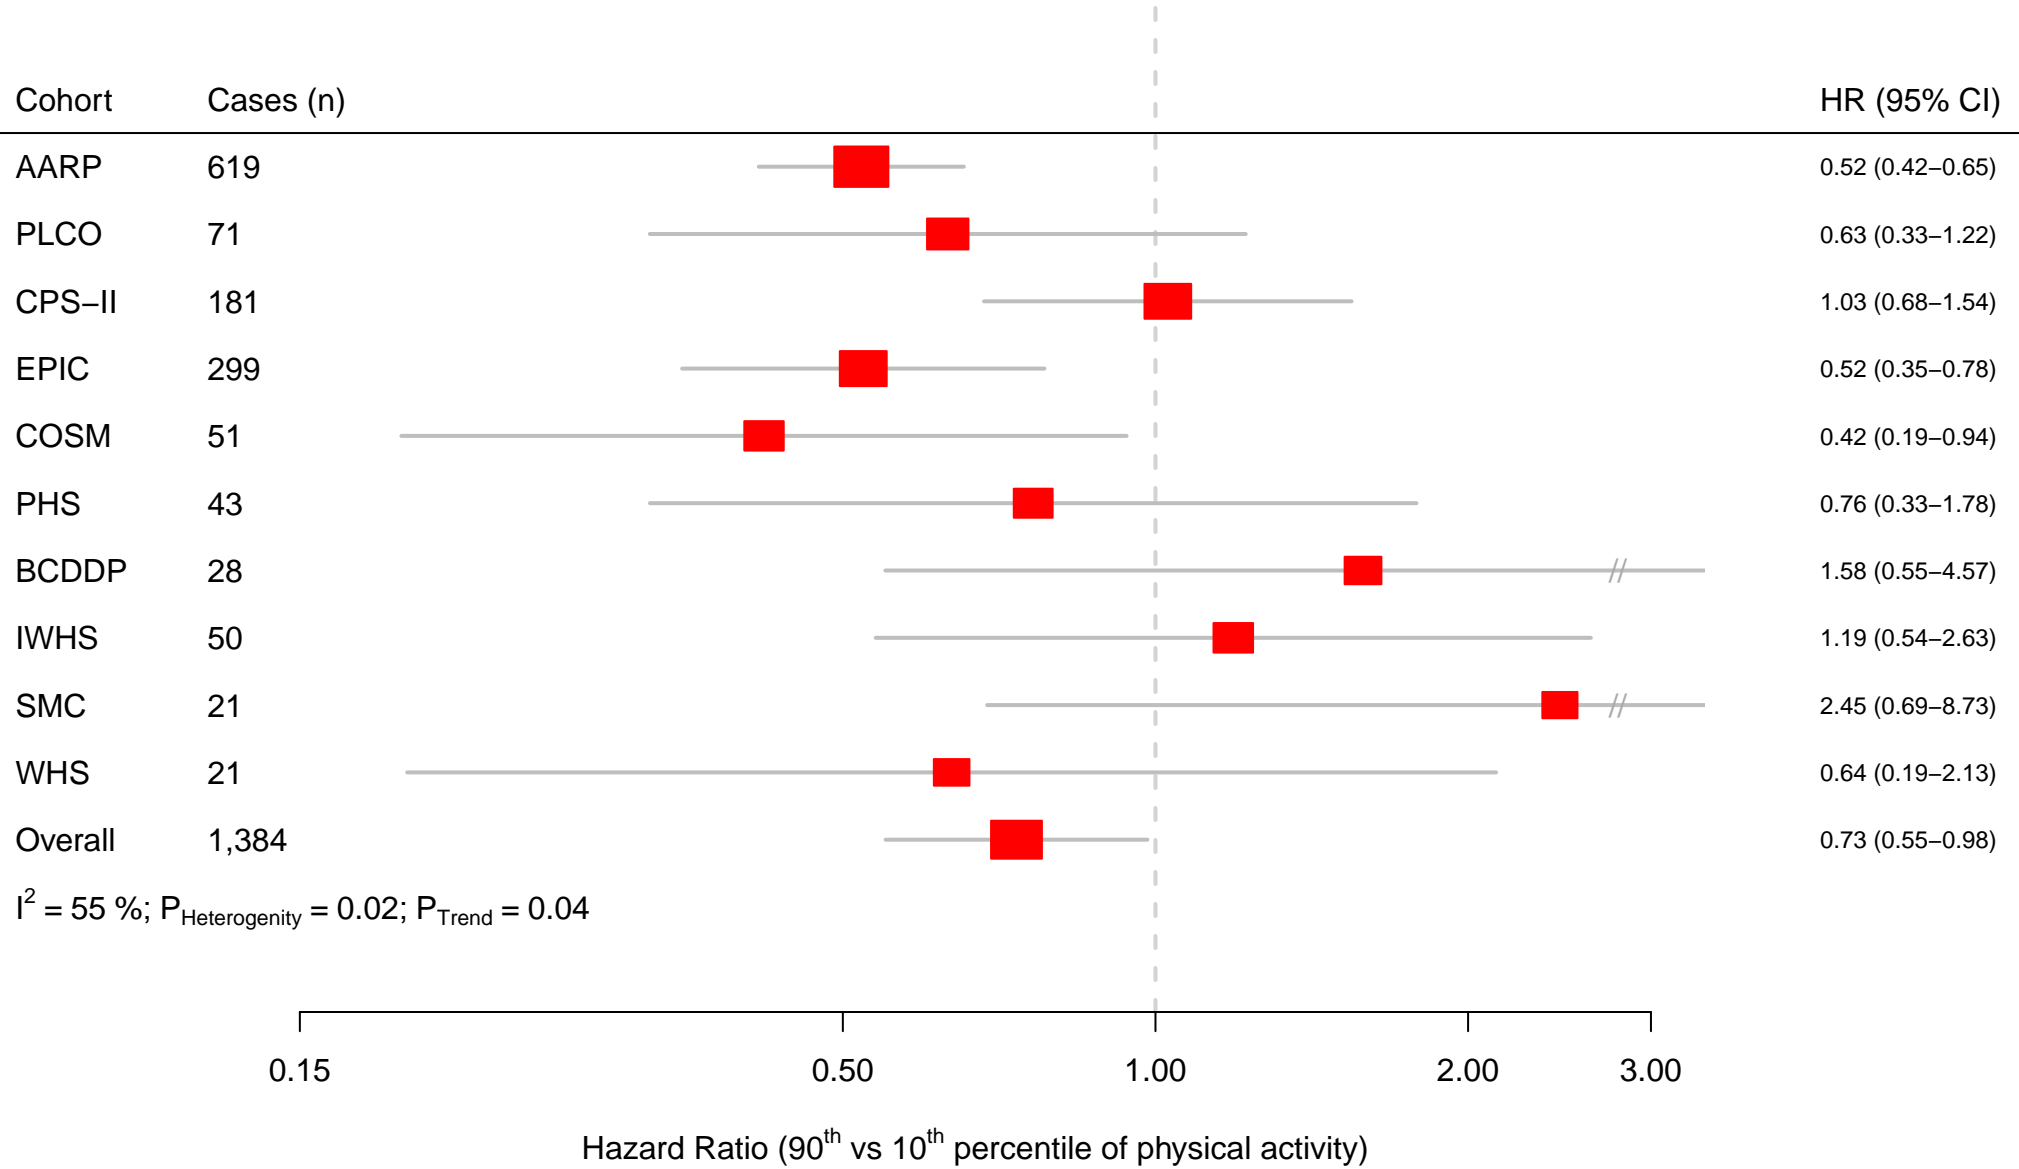

**eFigure 2d. Physical activity and risk of lung cancer**

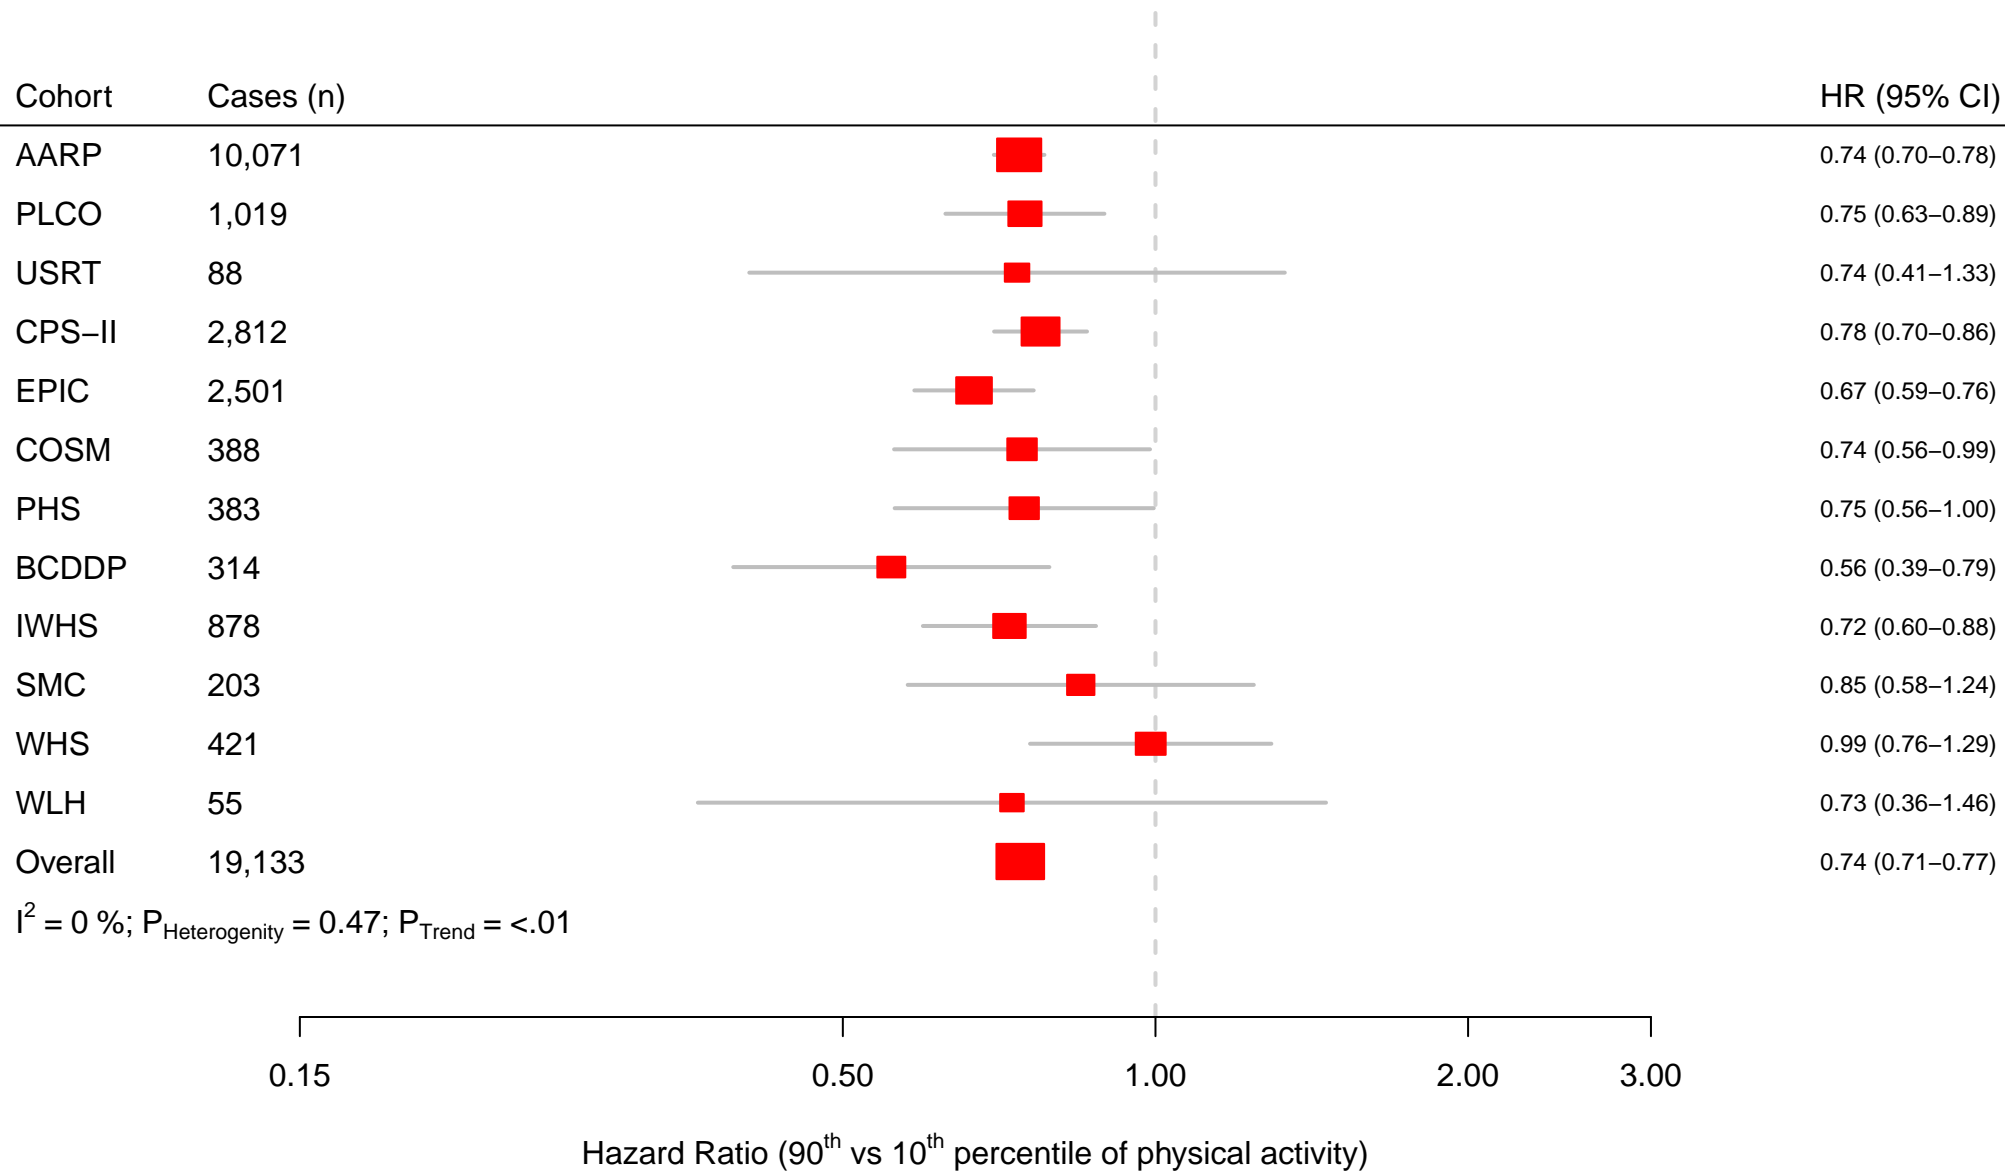

**eFigure 2e. Physical activity and risk of kidney cancer**

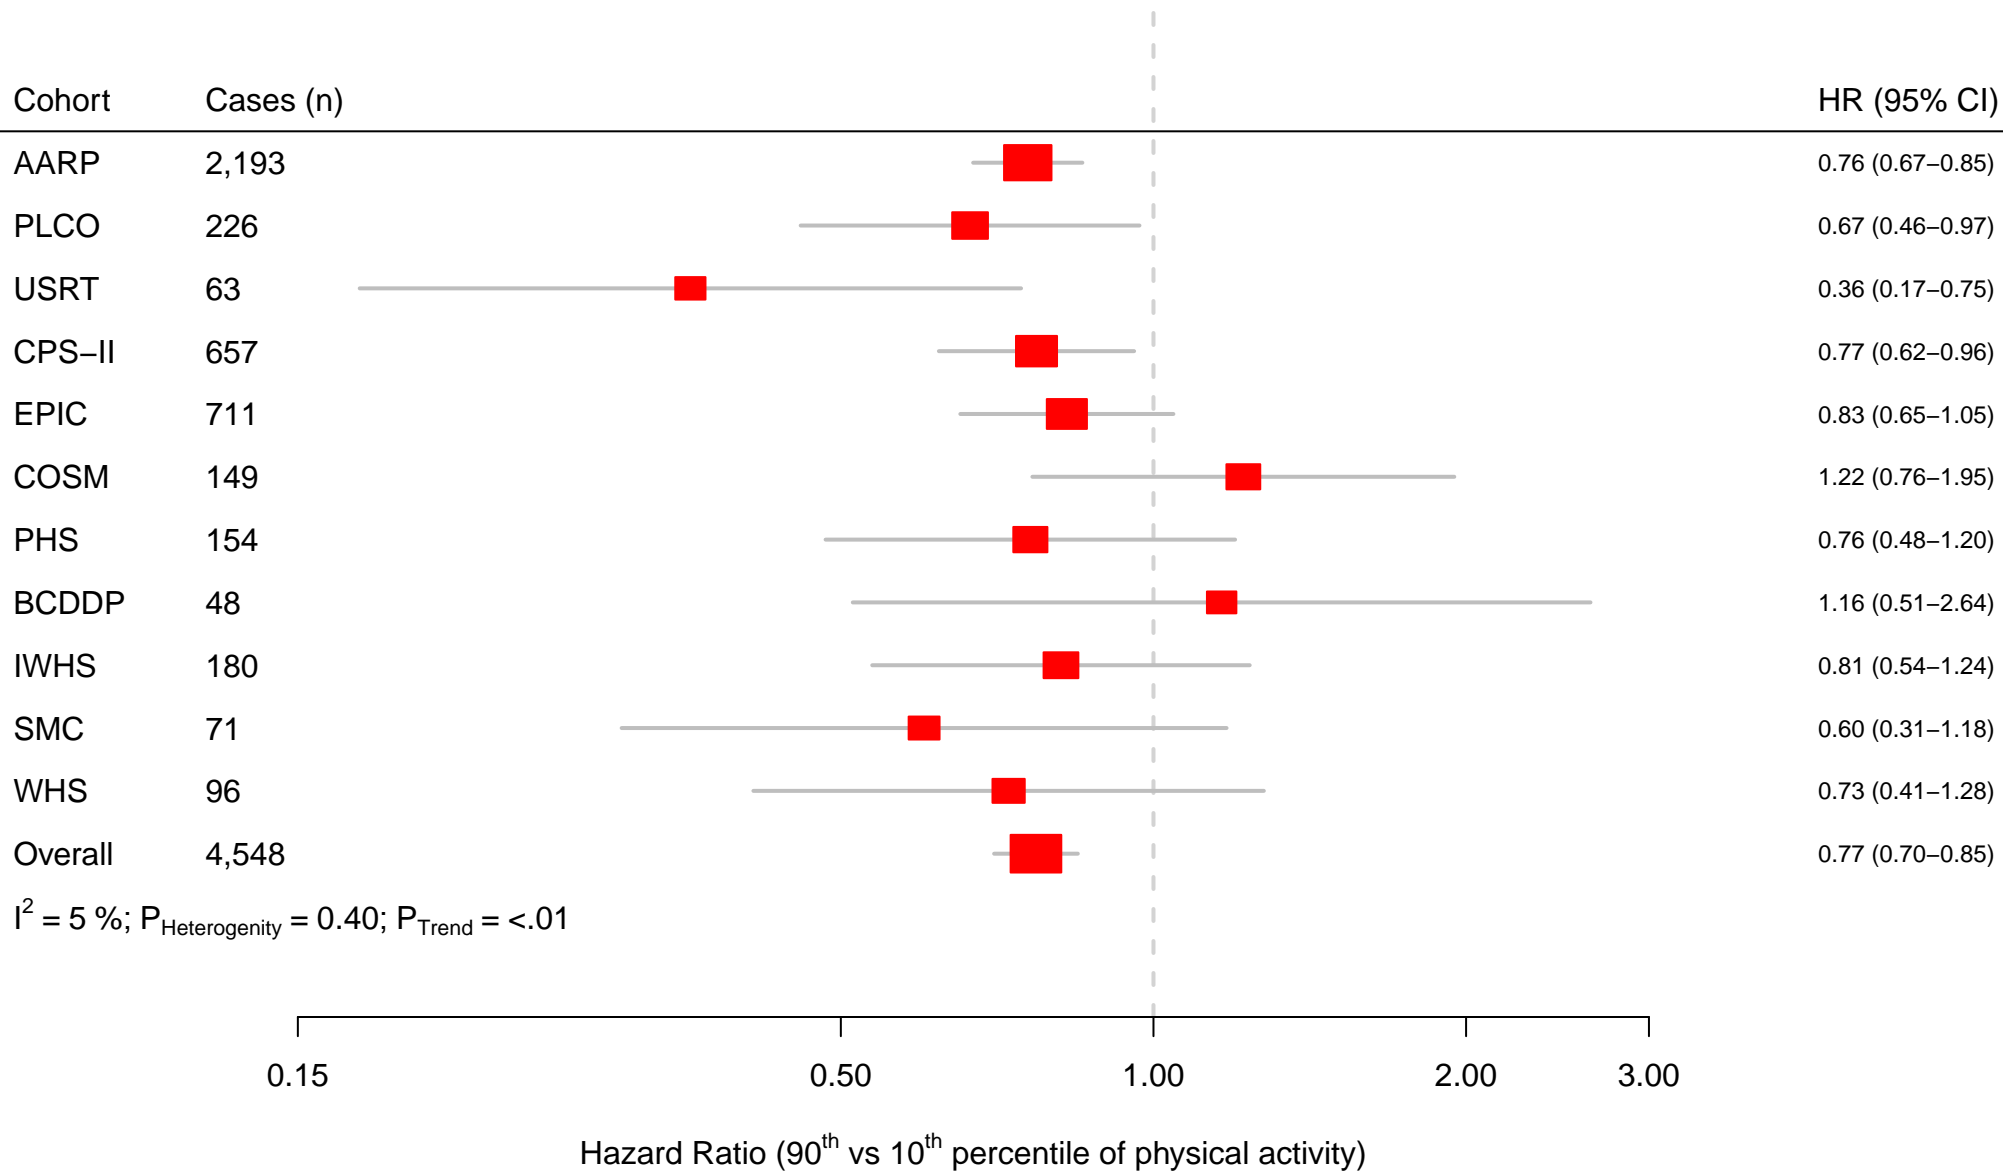



**eFigure 2f. Physical activity and risk of small intestine cancer**

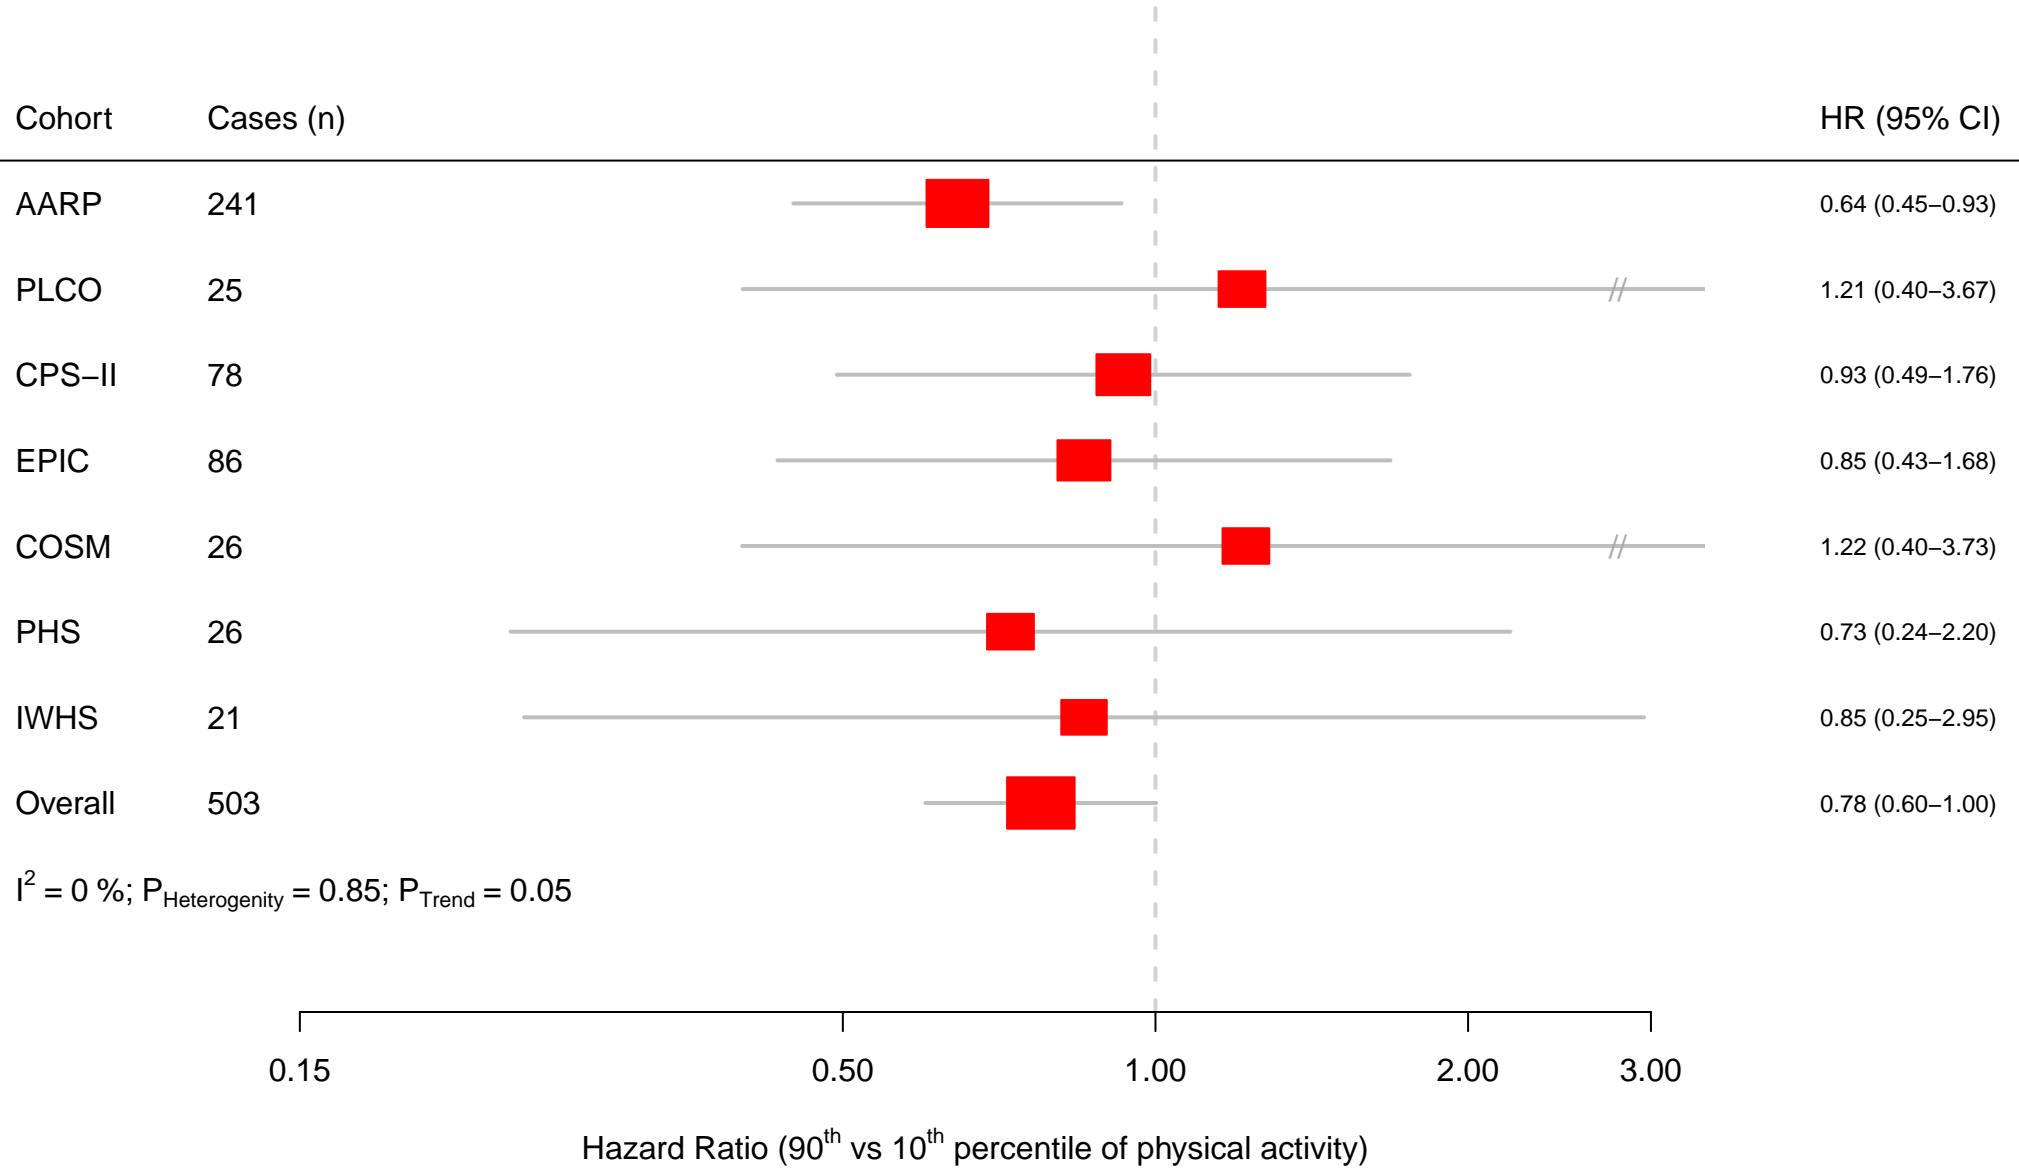

**eFigure 2g.** Physical activity and risk of gastric cardia cancer

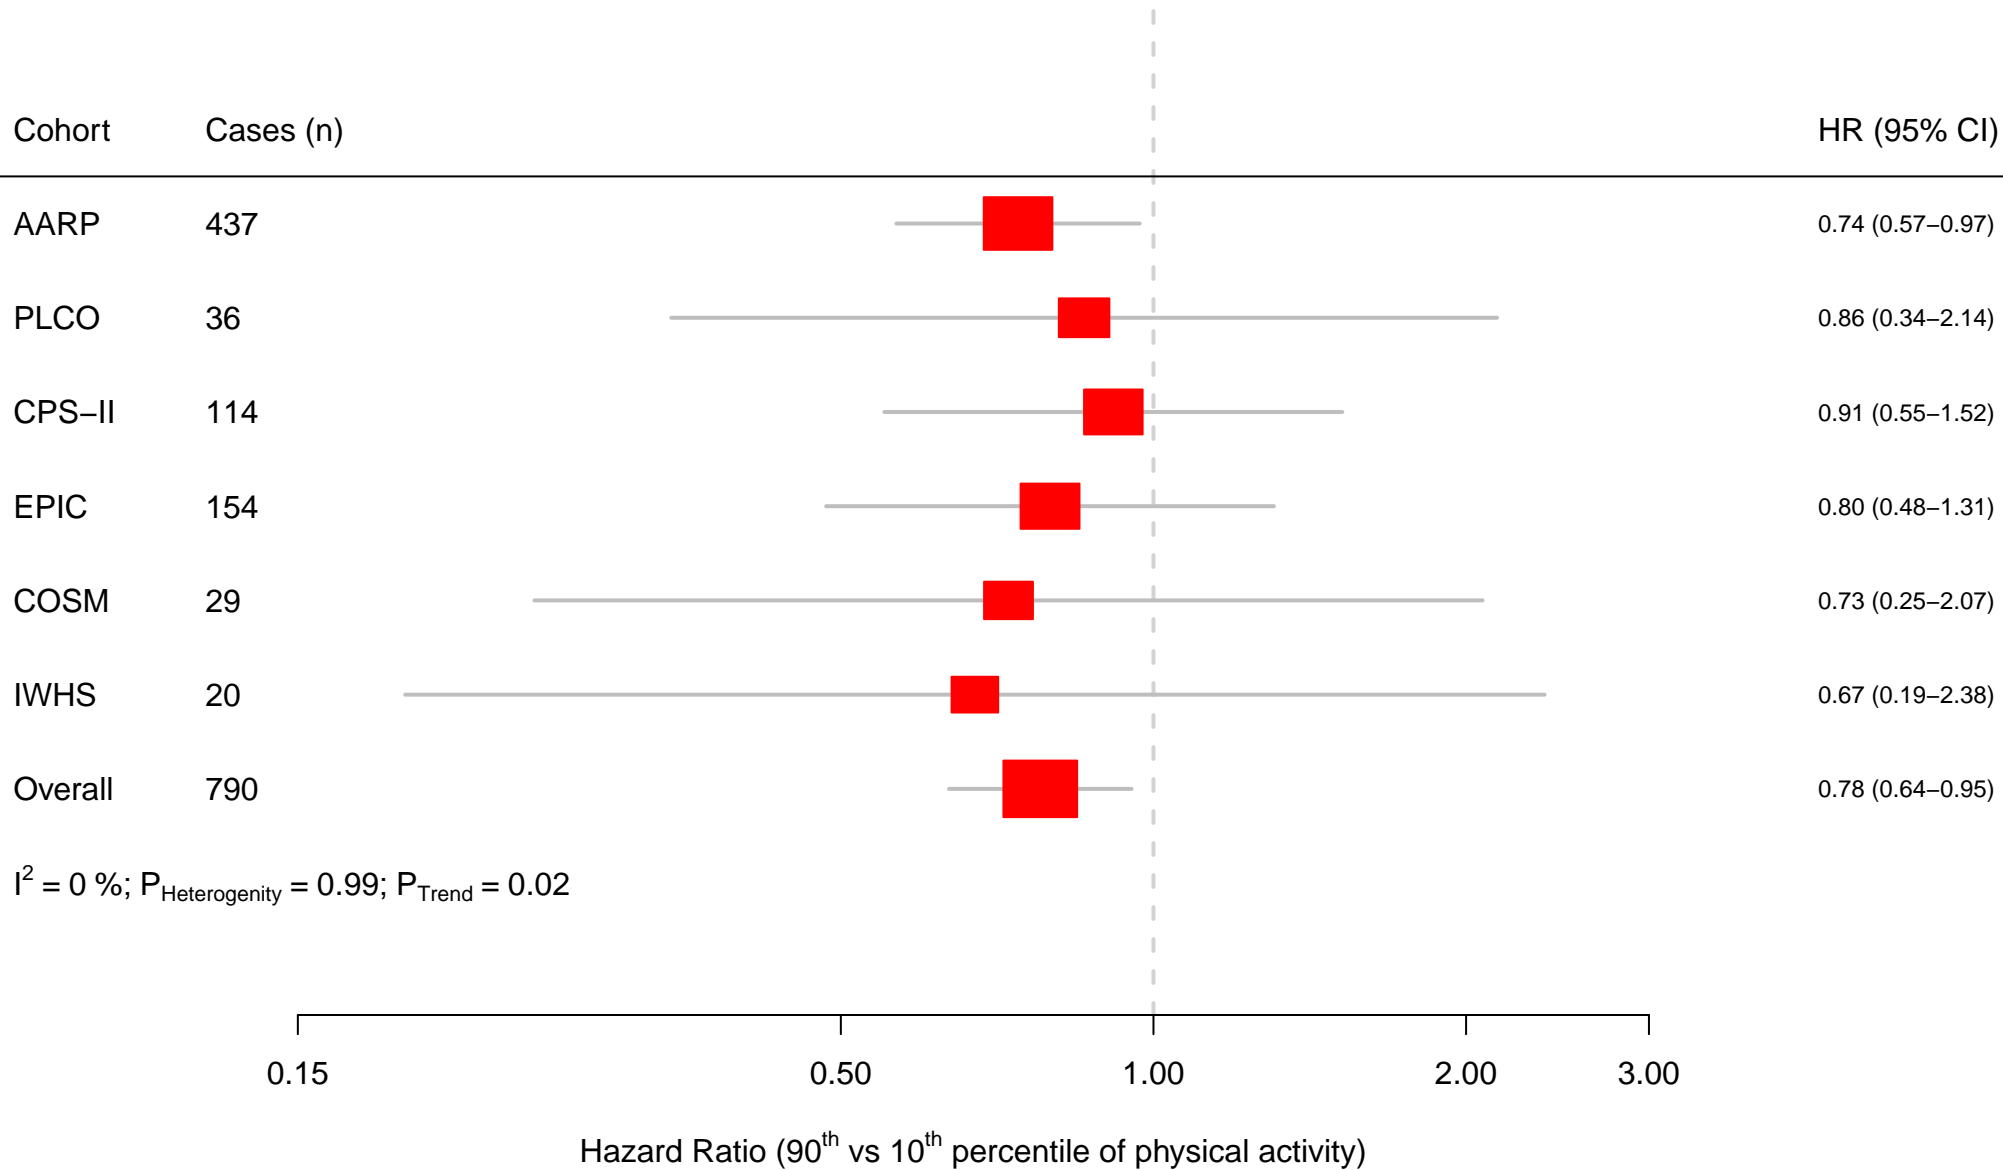

**eFigure 2h. Physical activity and risk of endometrial cancer**

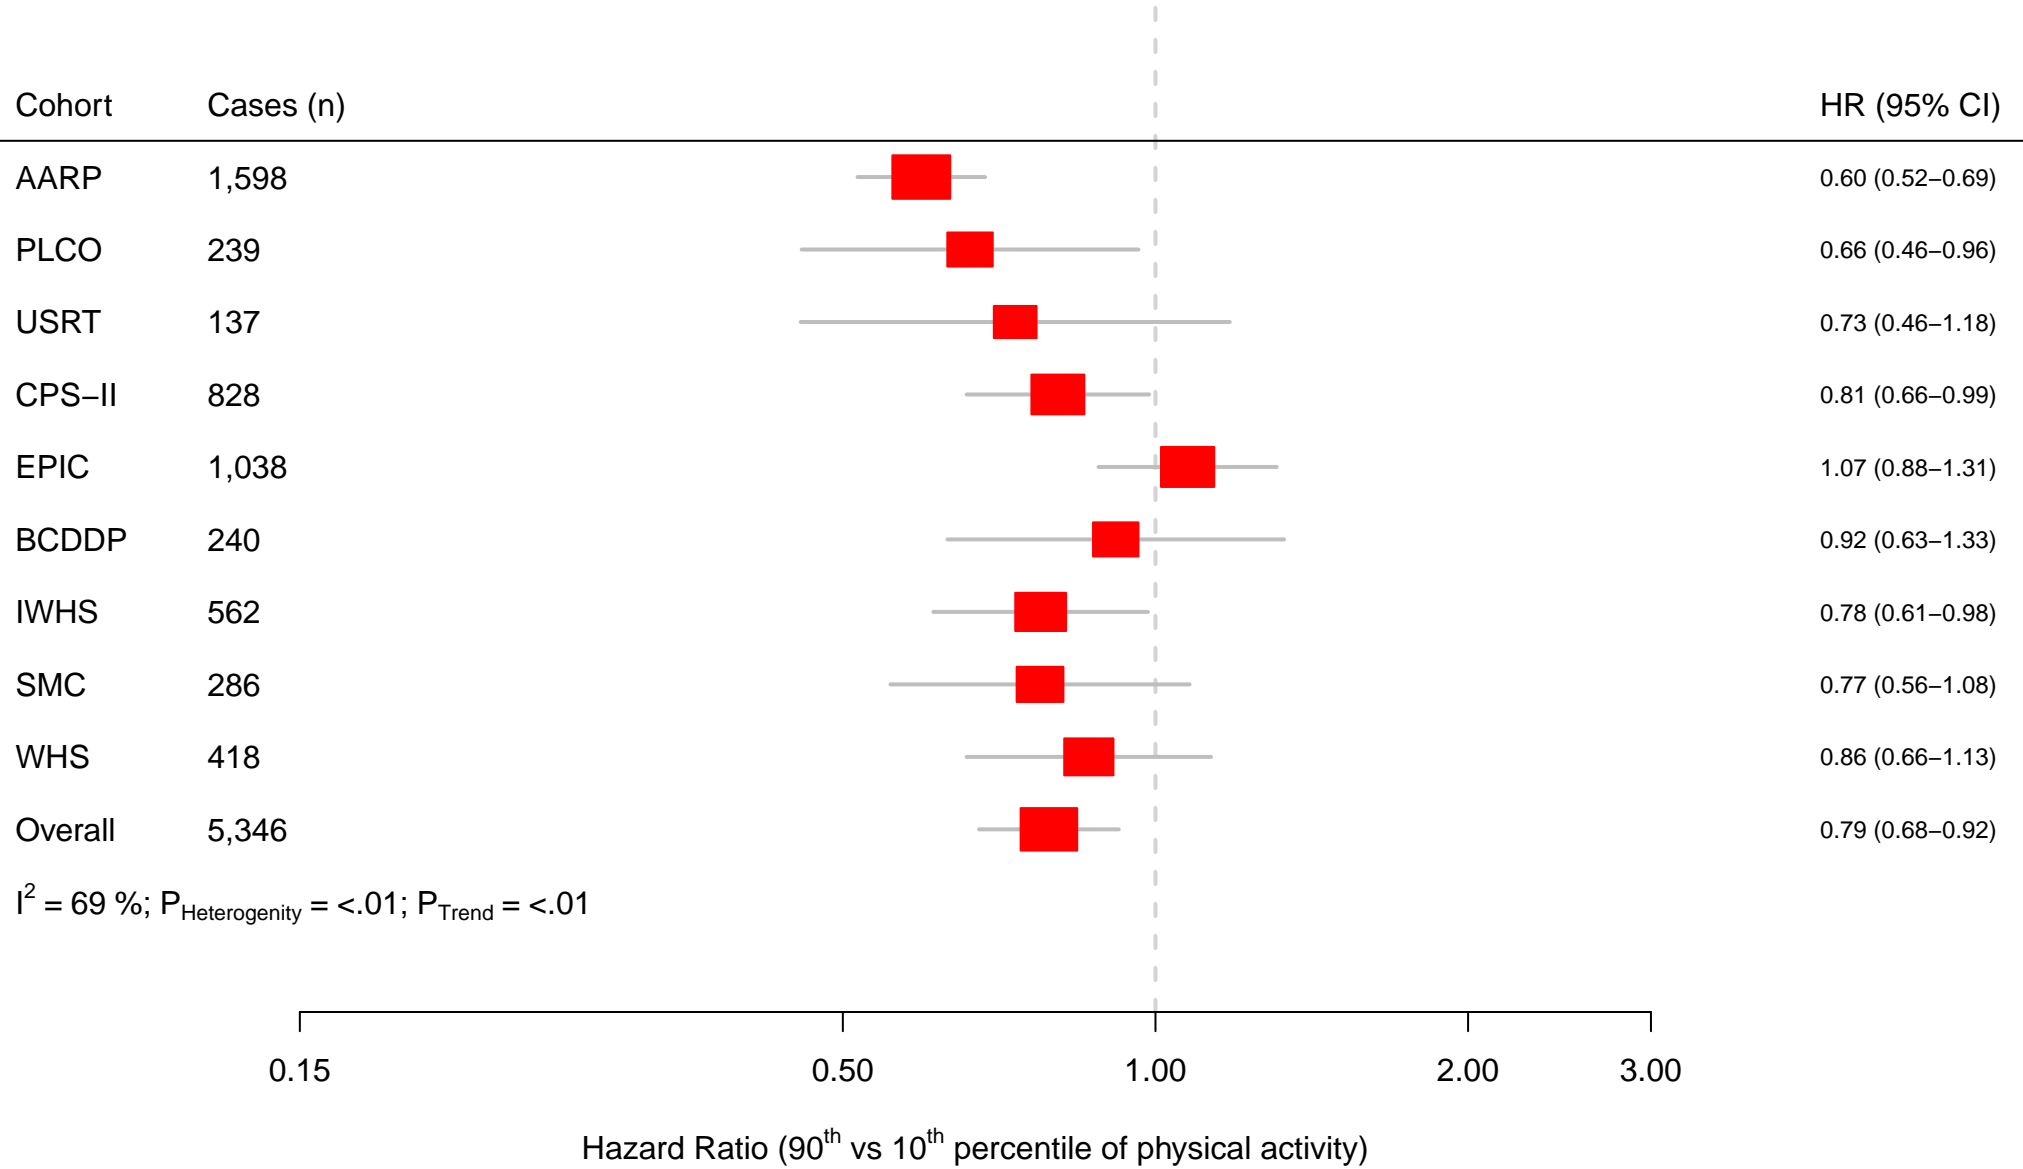

**eFigure 2i.** Physical activity and risk of esophageal squamous cancer

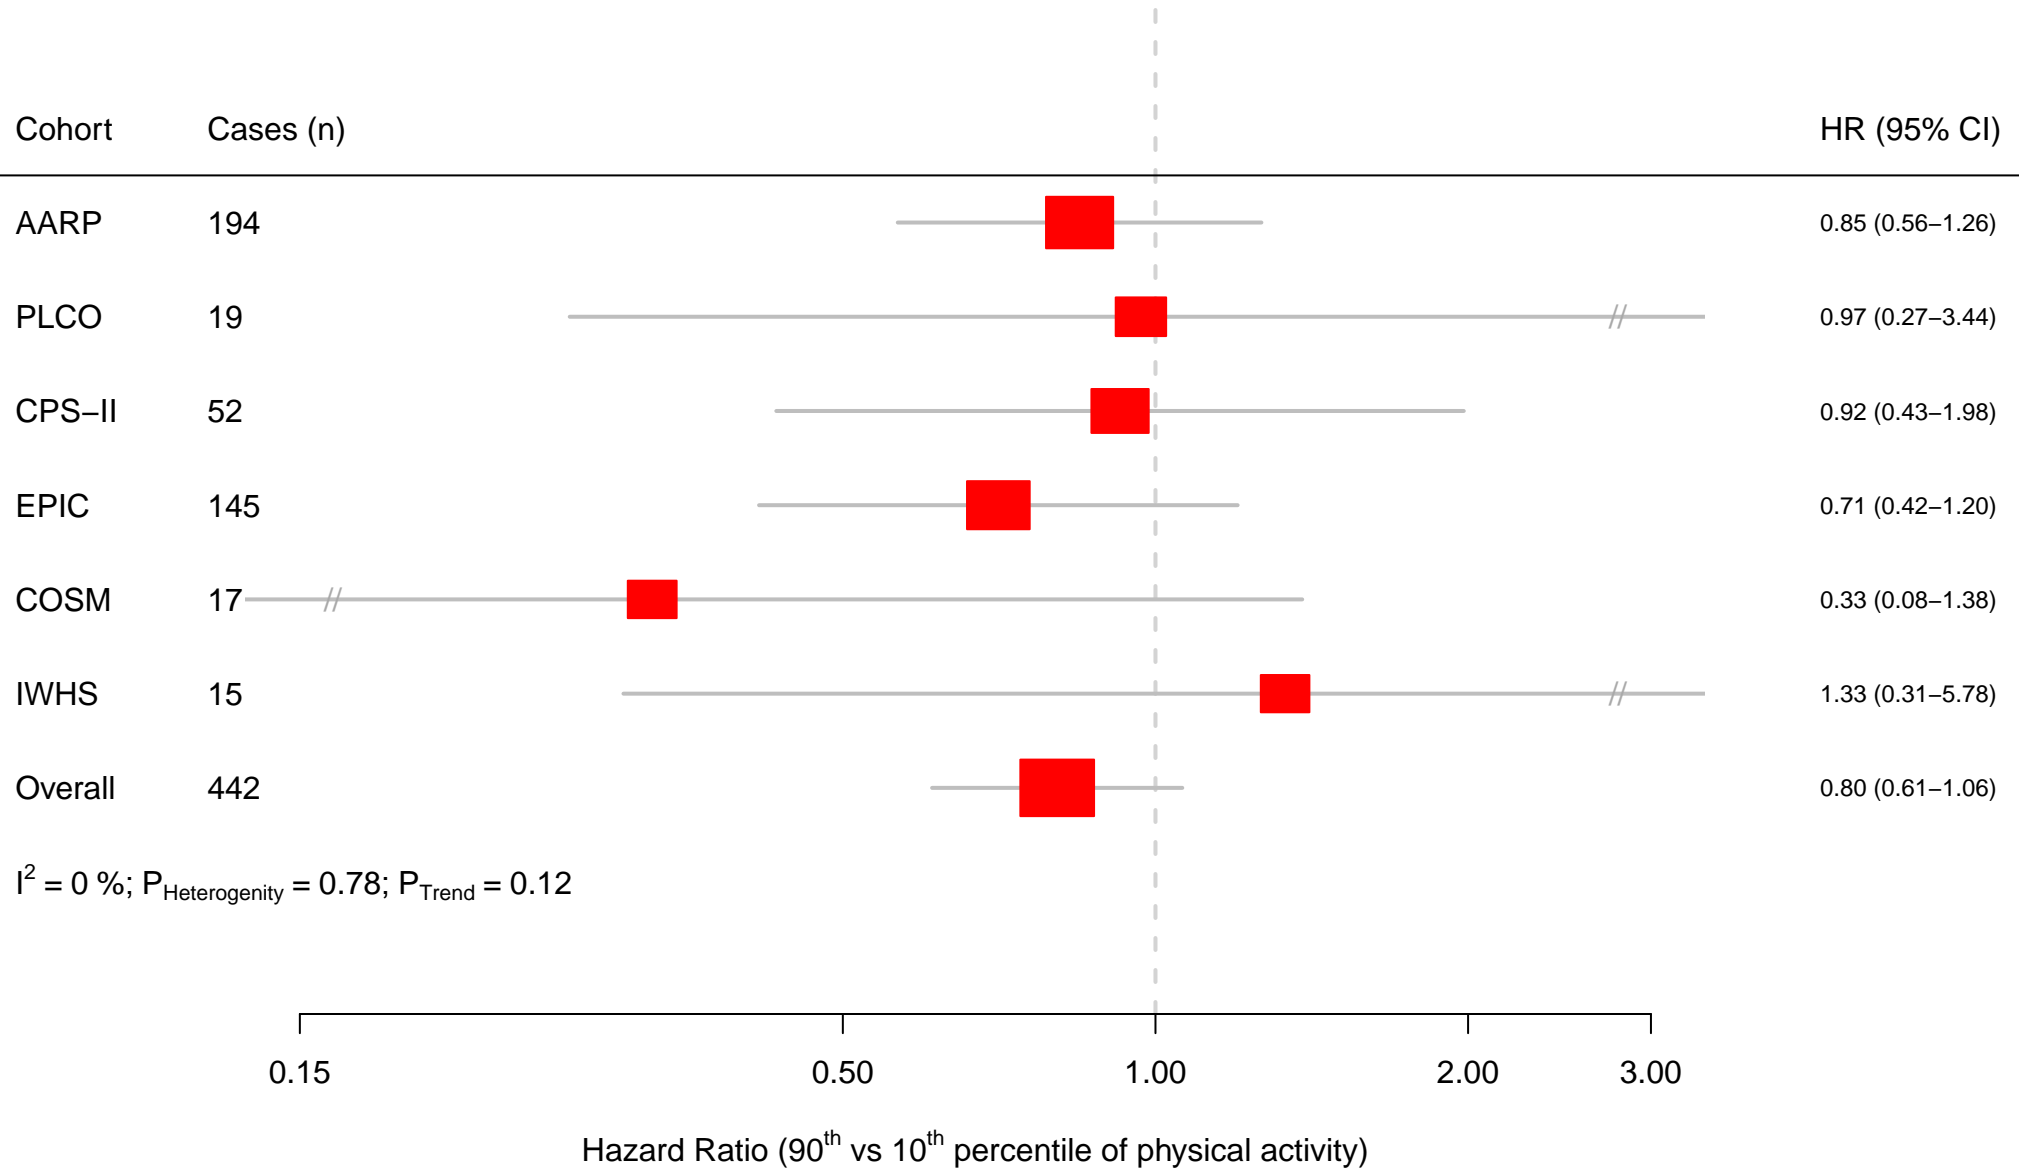

**eFigure 2j. Physical activity and risk of myeloid leukemia**

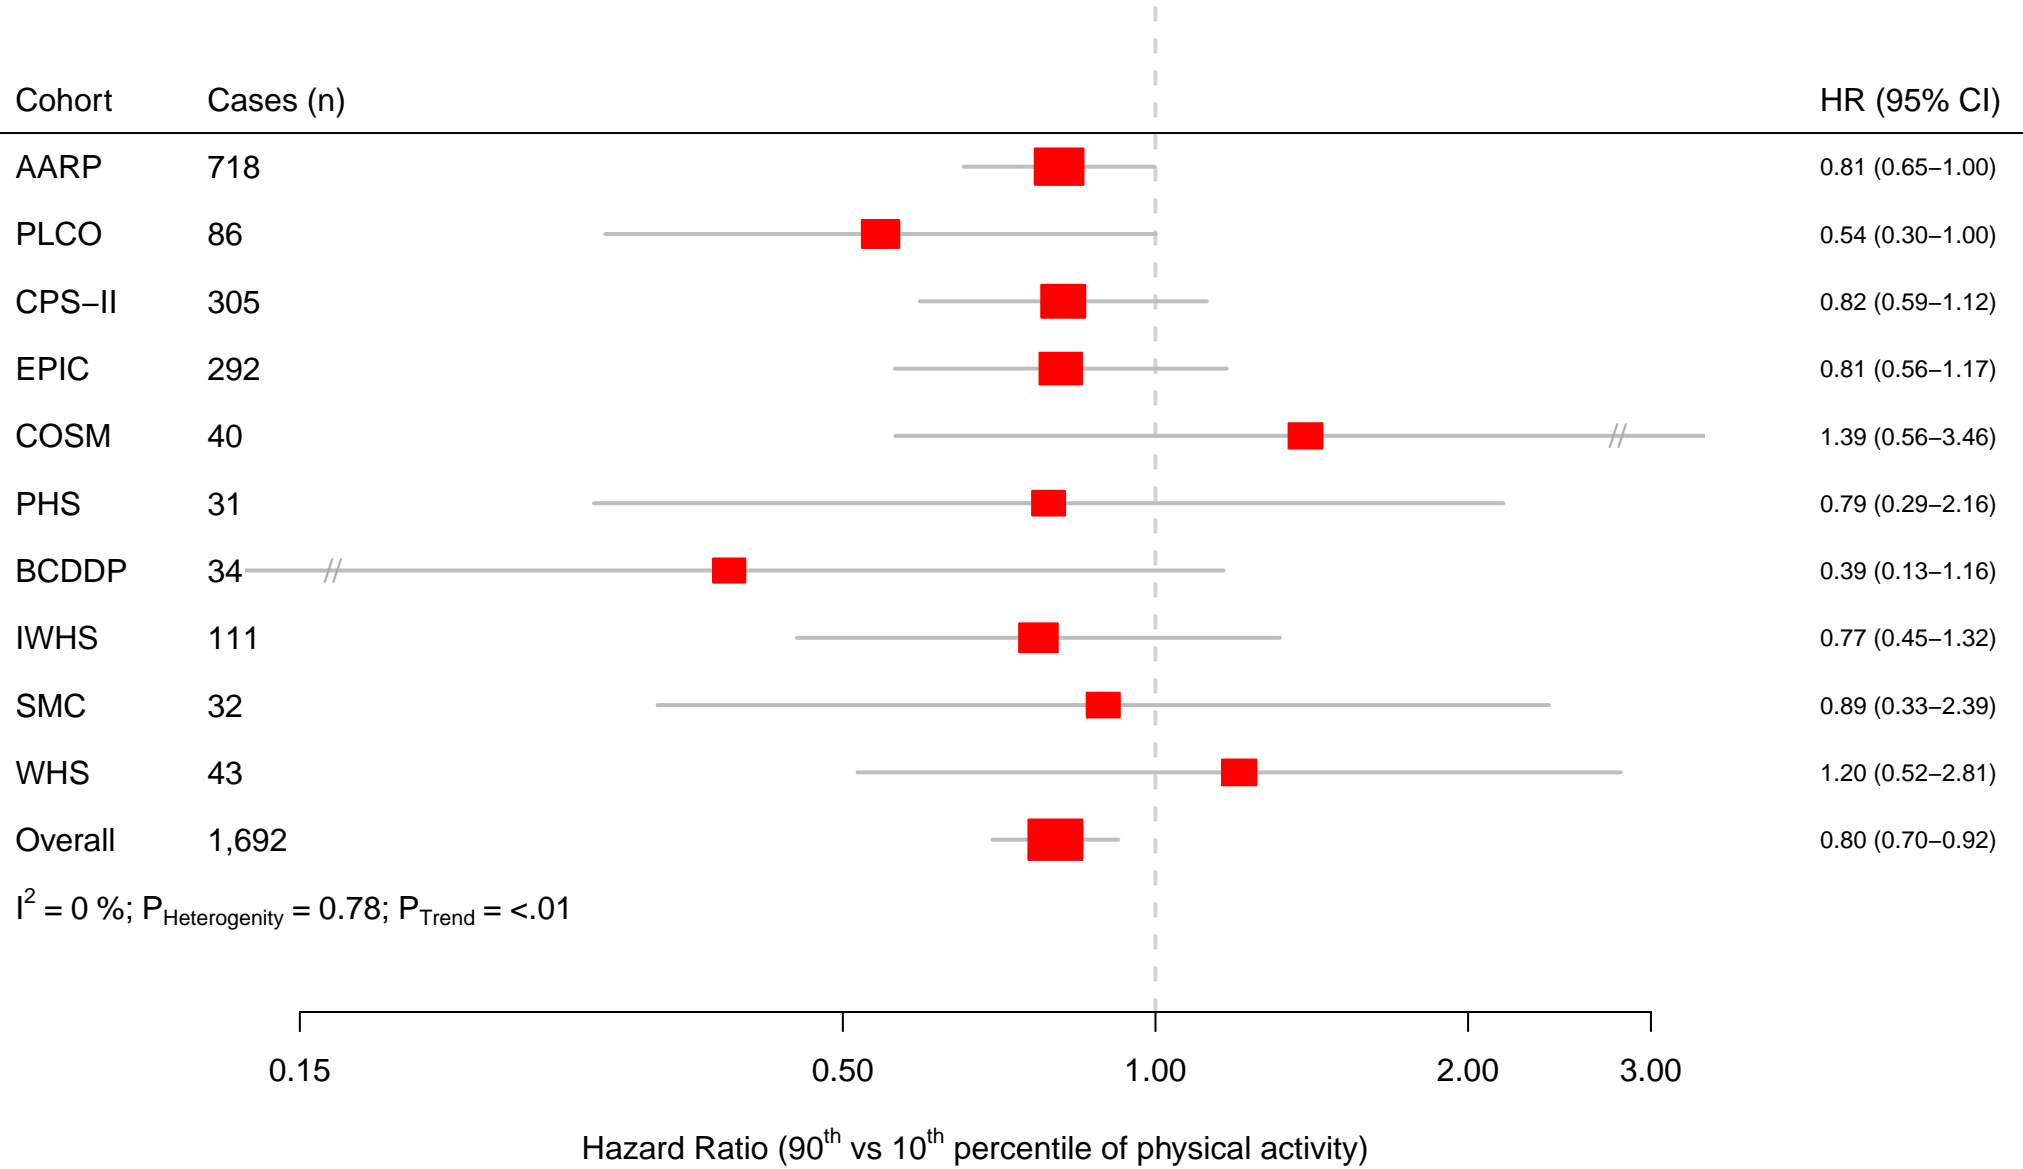

**eFigure 2k. Physical activity and risk of myeloma**

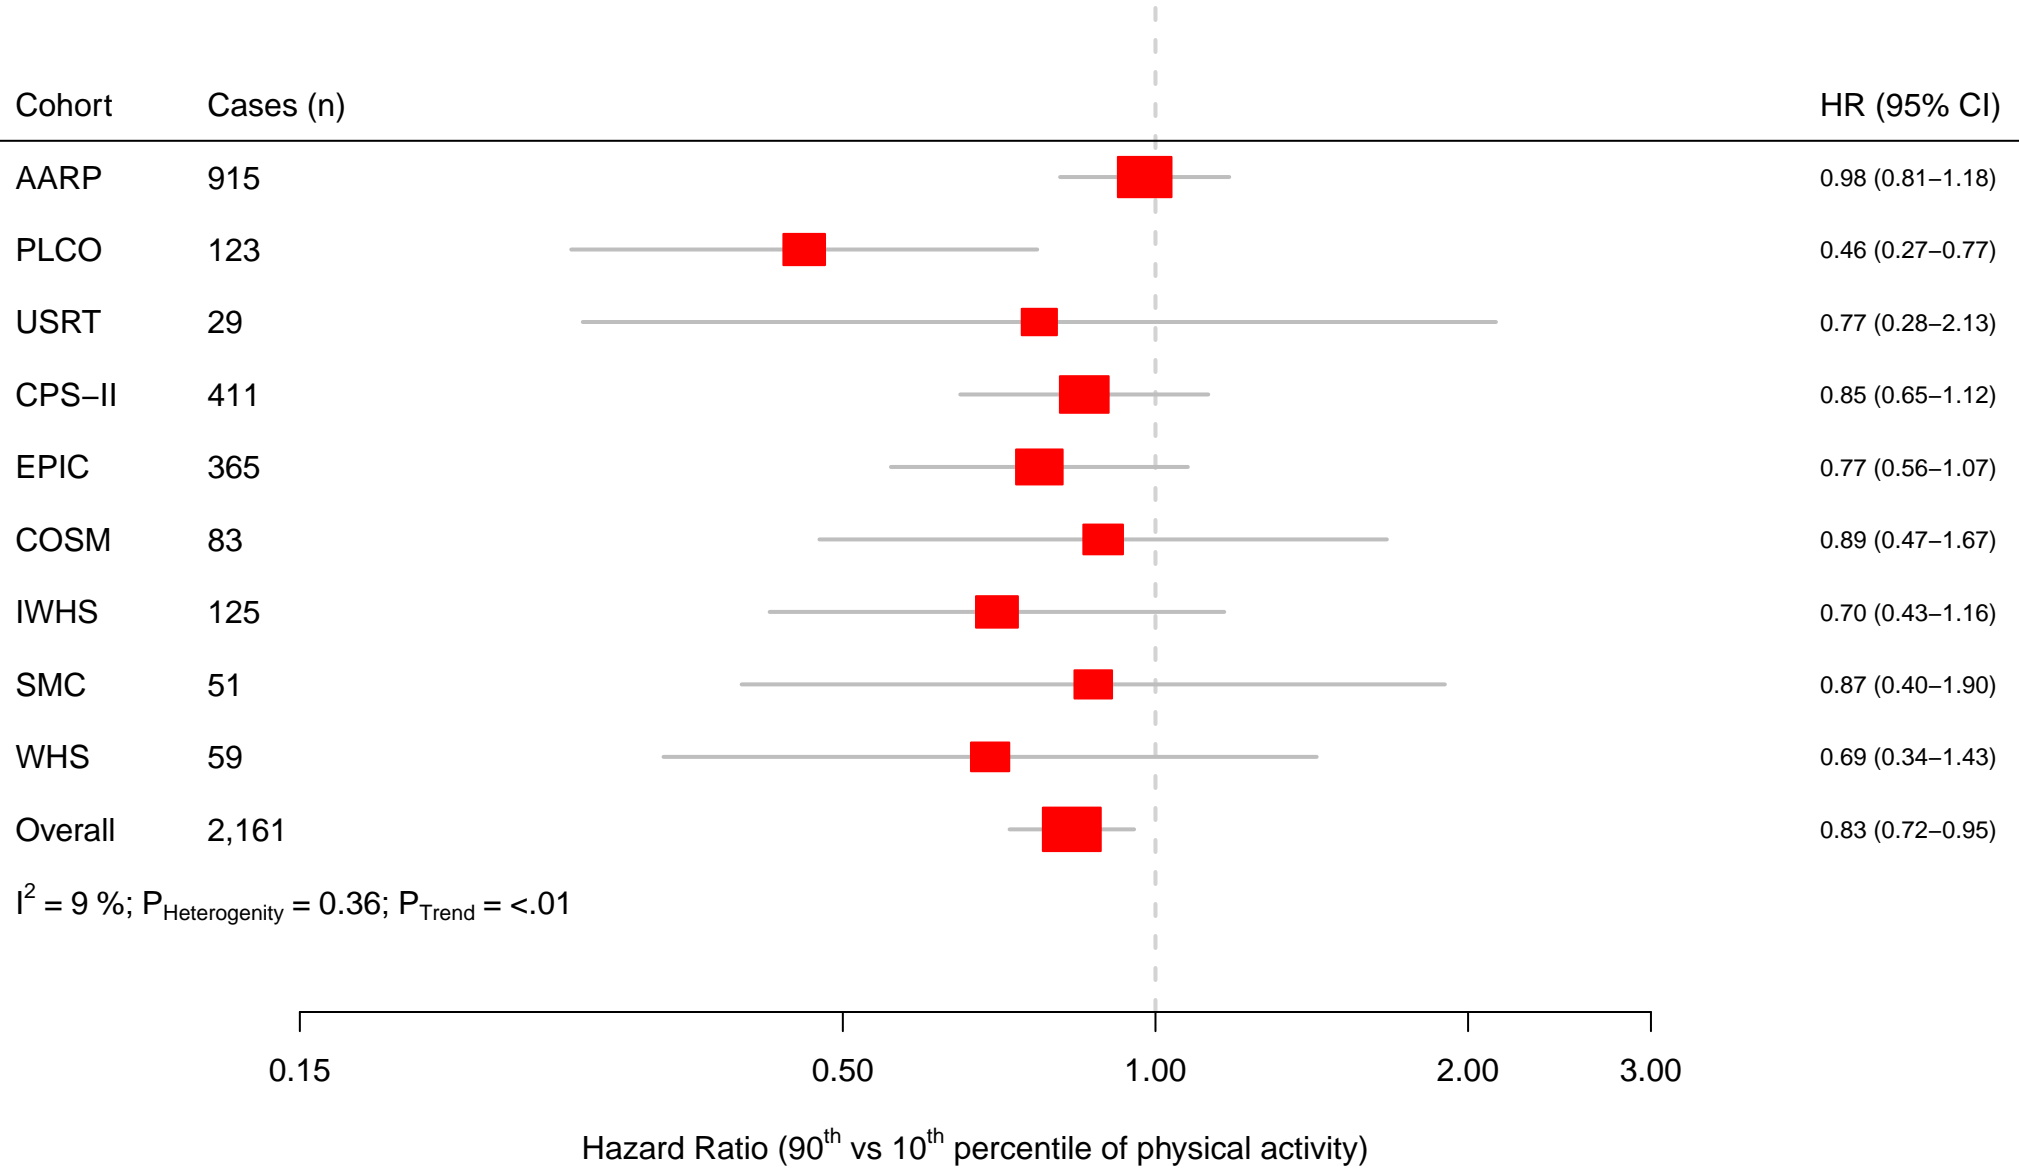

**eFigure 2I. Physical activity and risk of colon cancer**

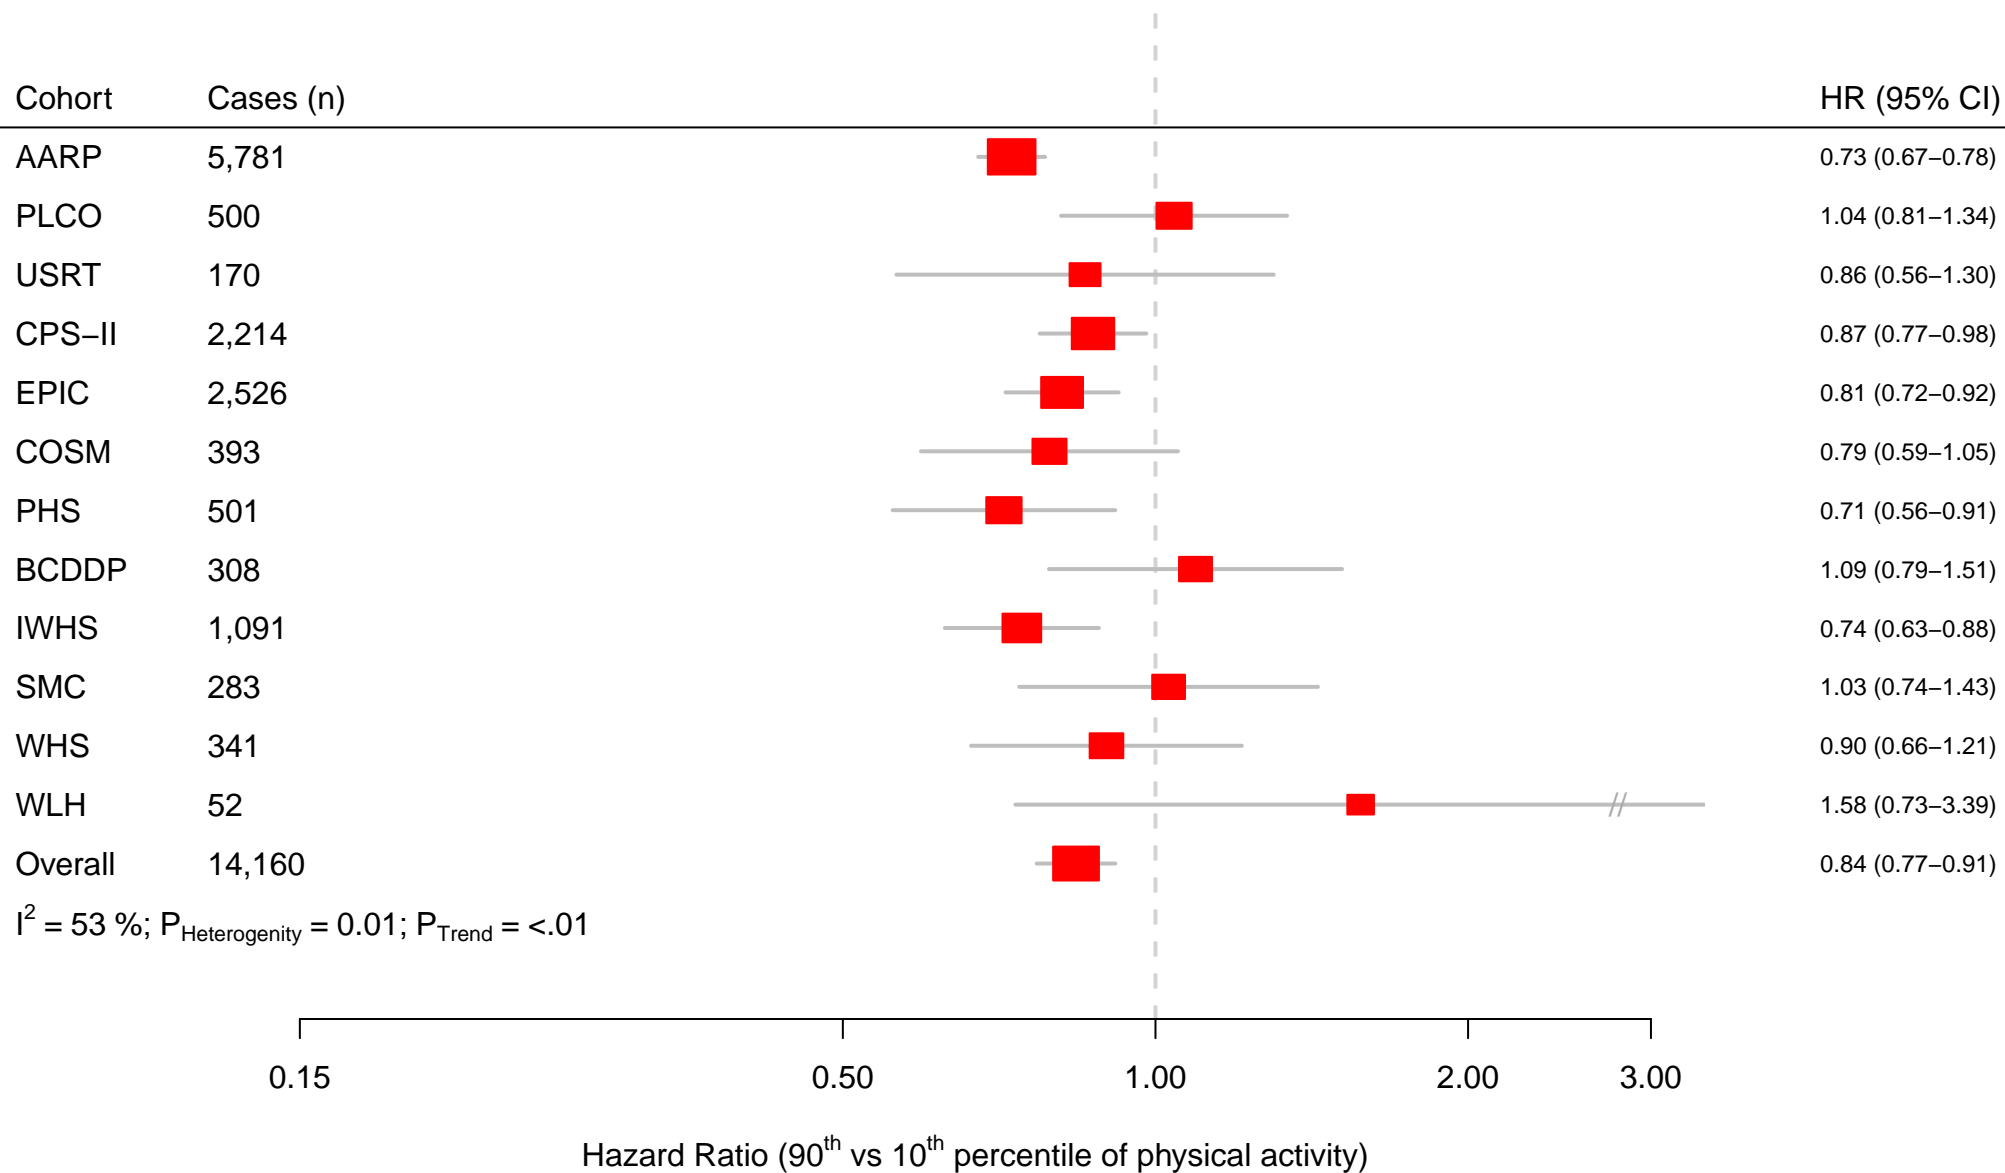

**eFigure 2m.** Physical activity and risk of head and neck cancer

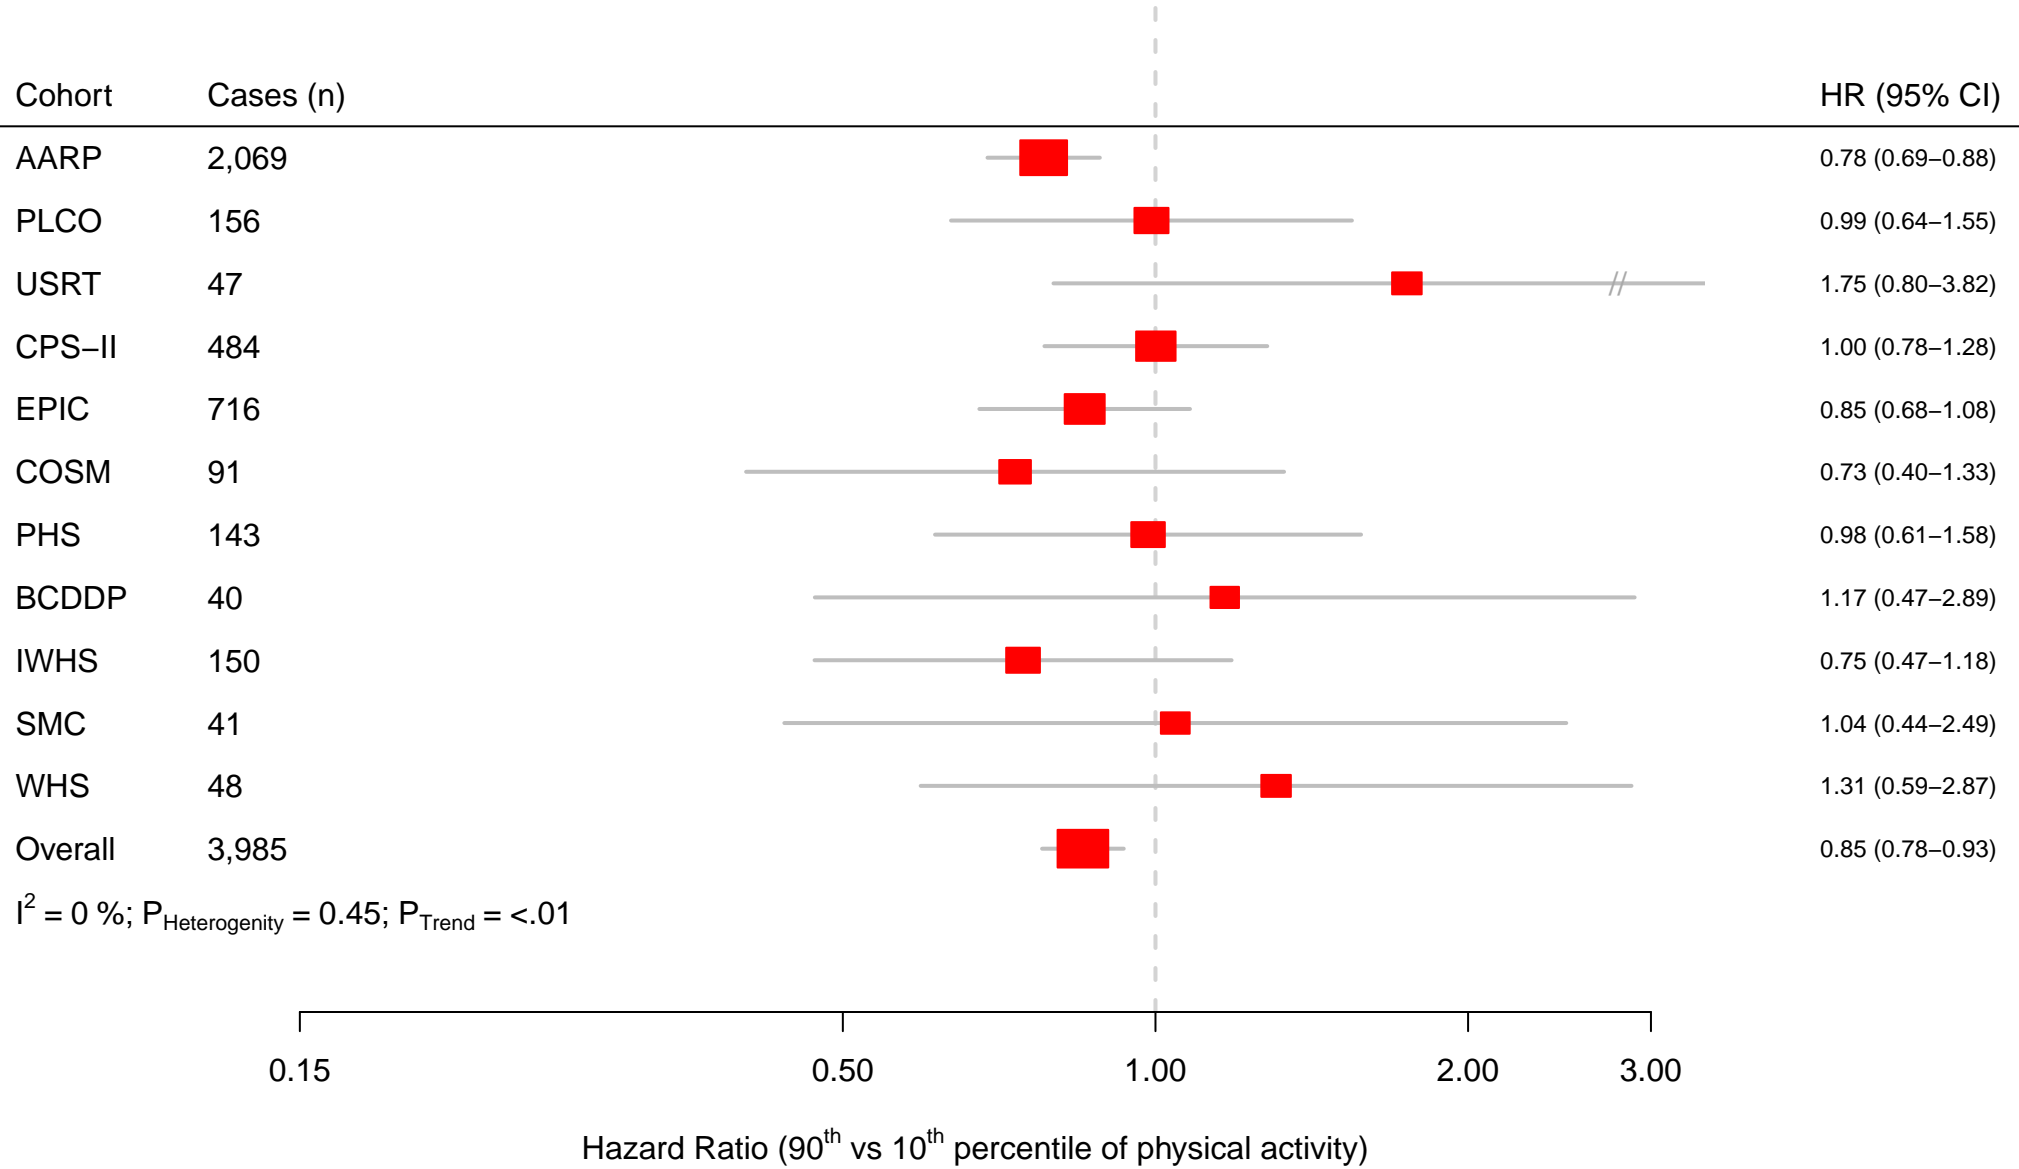



**eFigure 2n.** Physical activity and risk of rectum cancer

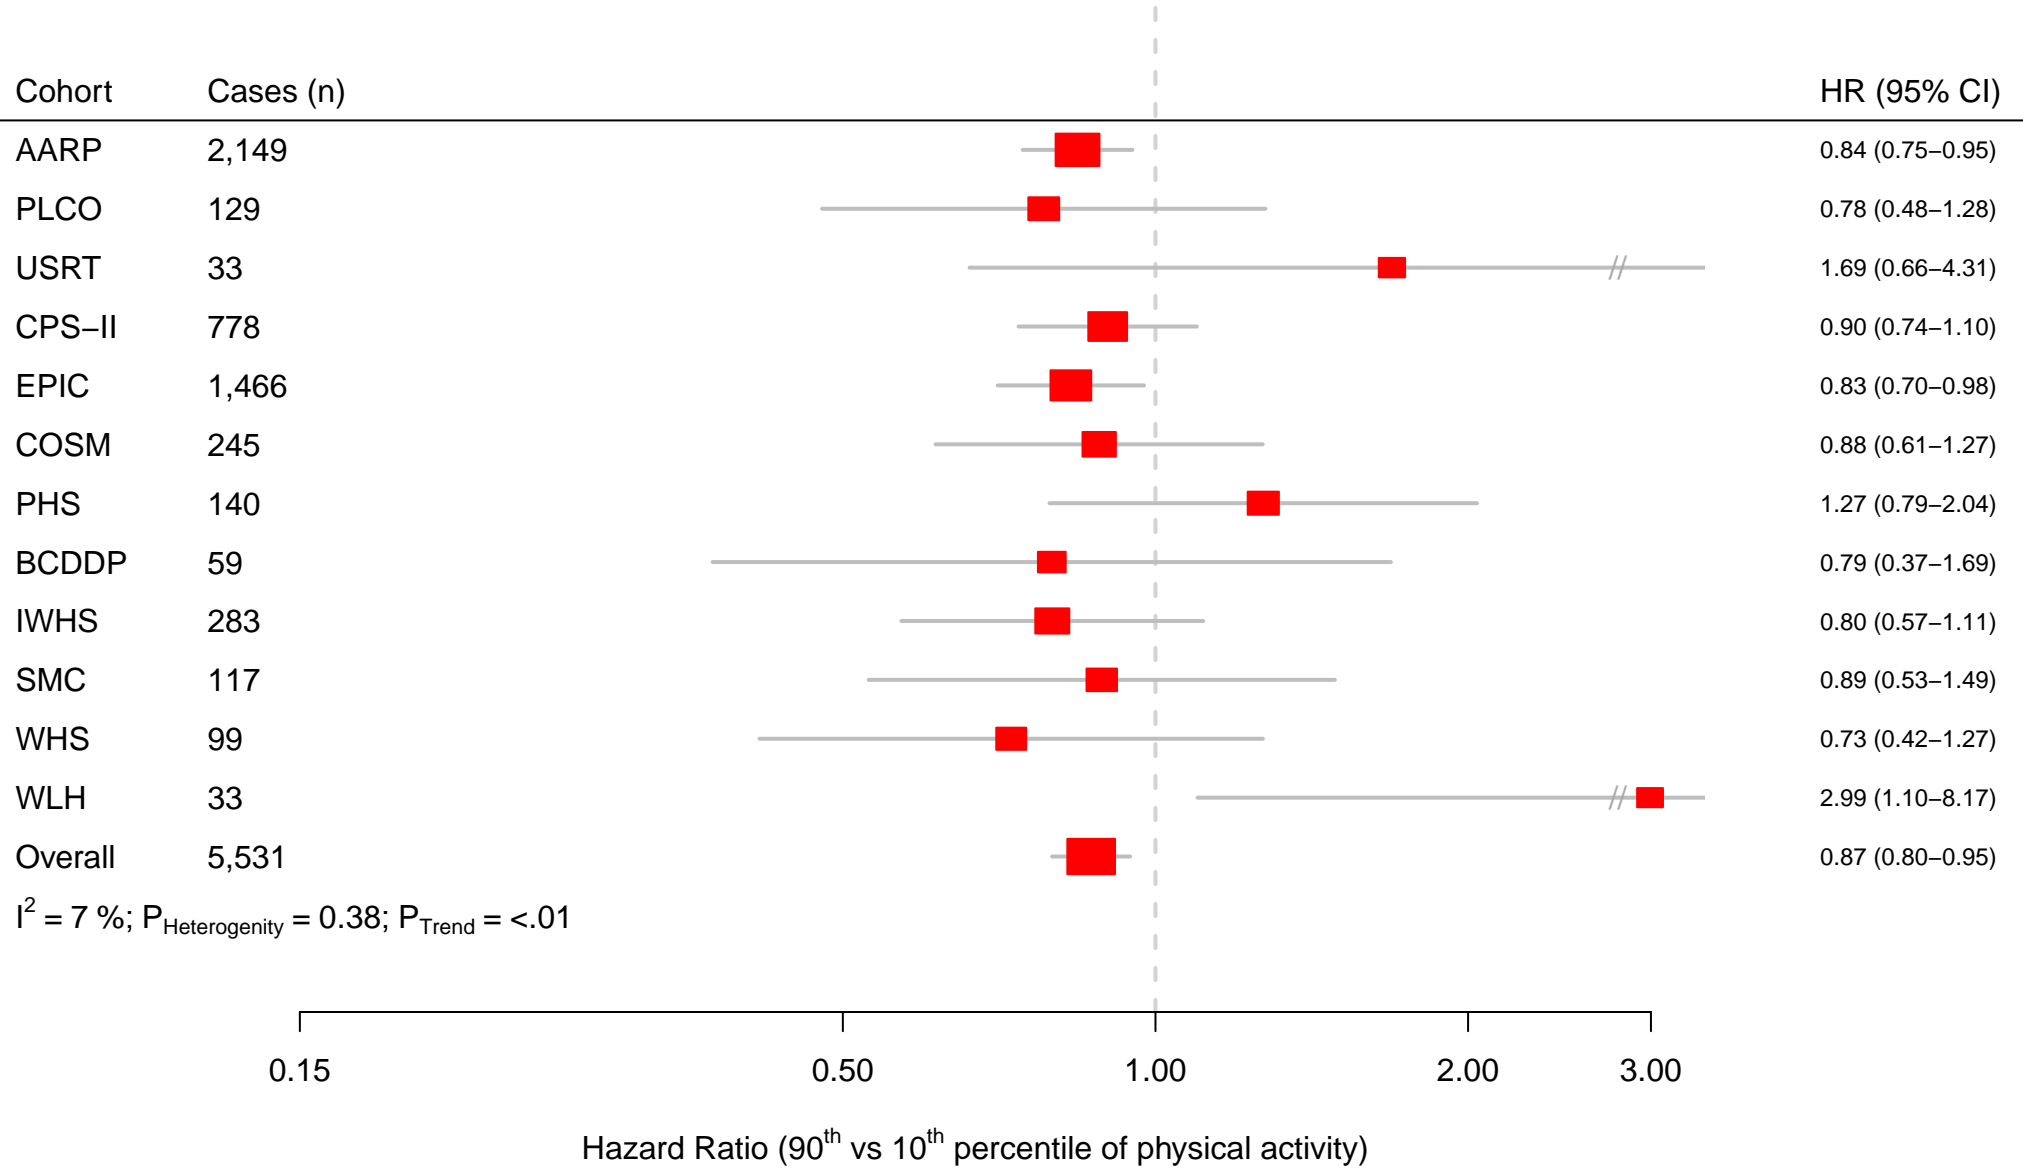

**eFigure 2o.** Physical activity and risk of bladder cancer

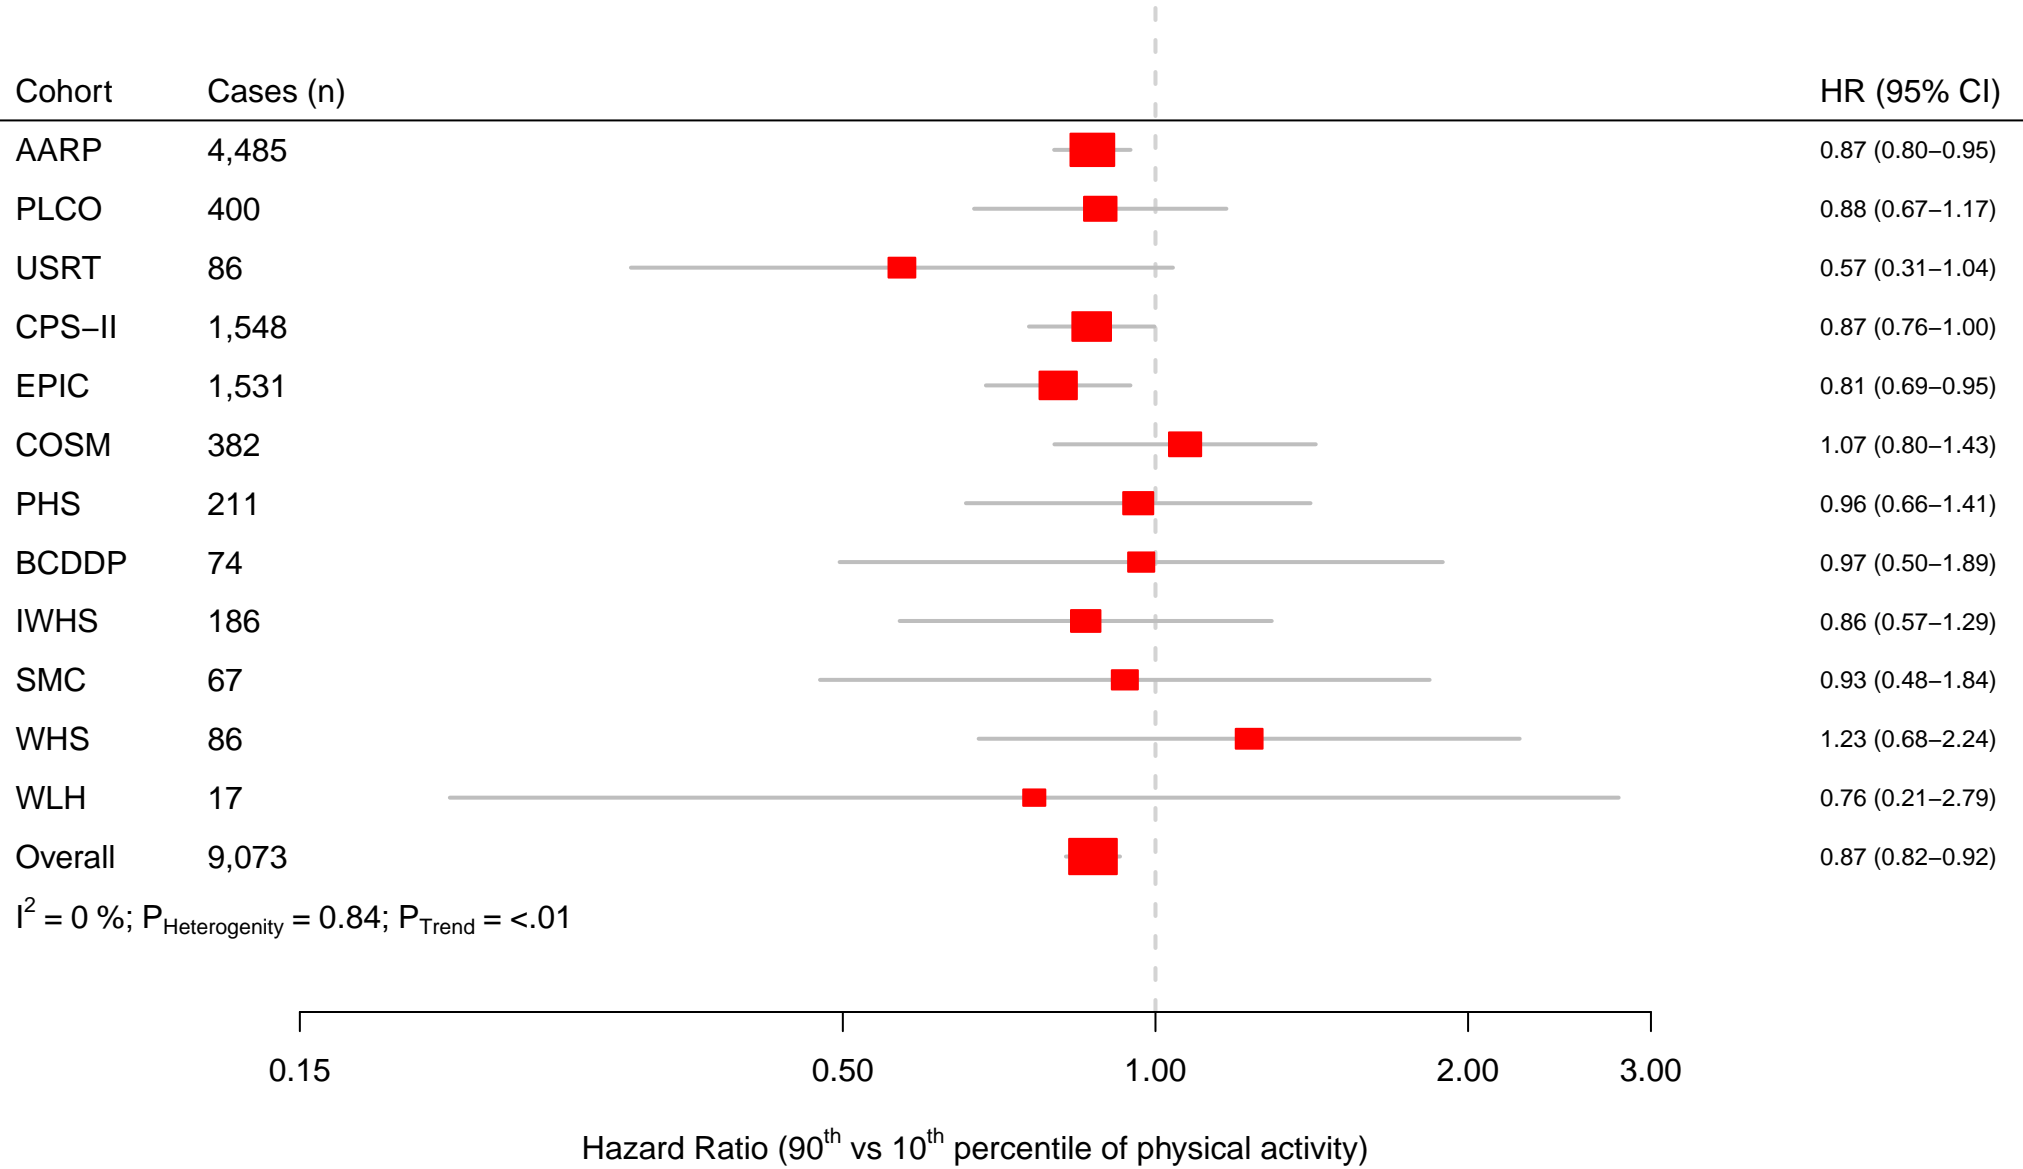

**eFigure 2p.** Physical activity and risk of breast cancer

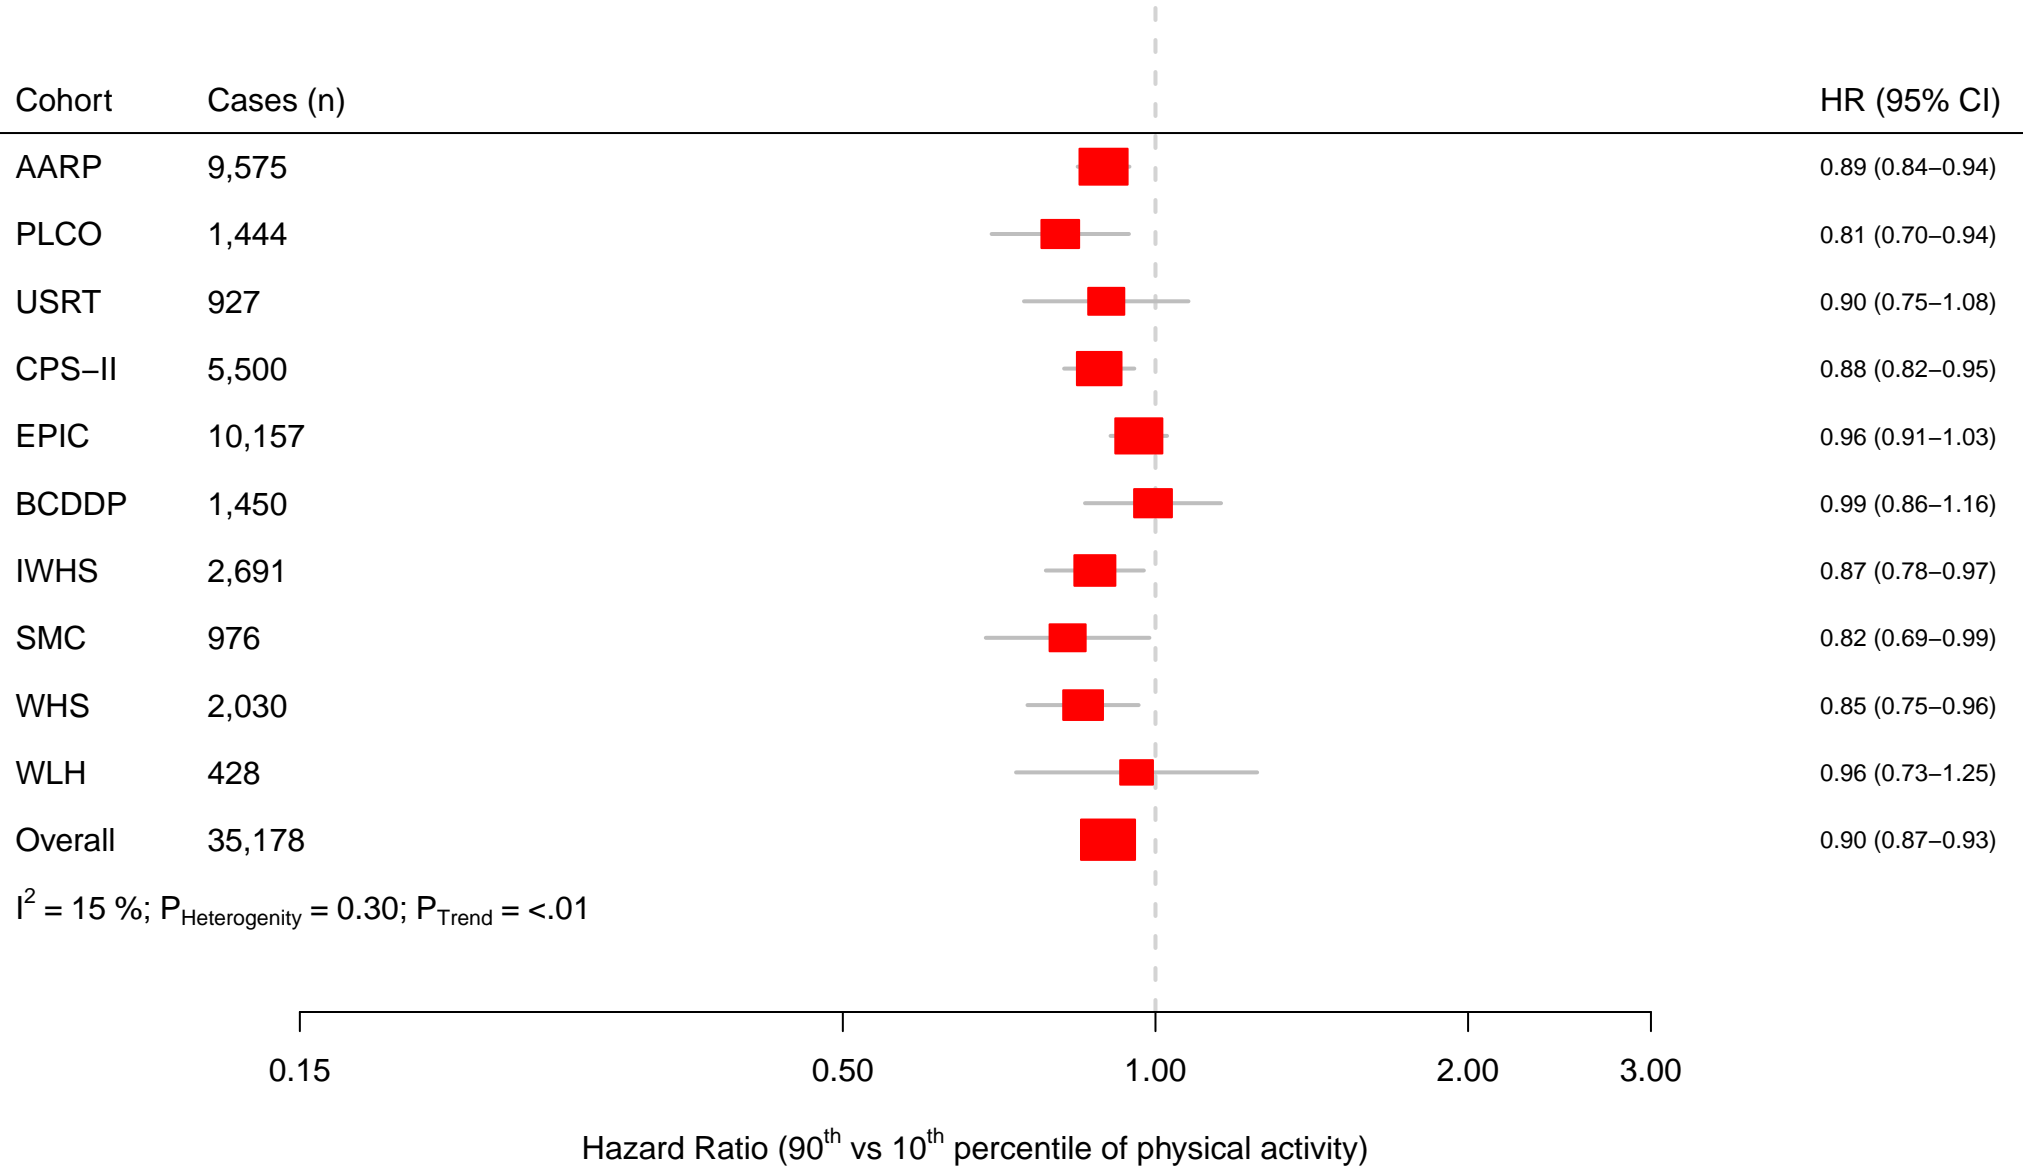

**eFigure 2q.** Physical activity and risk of non-hodgkin lymphoma

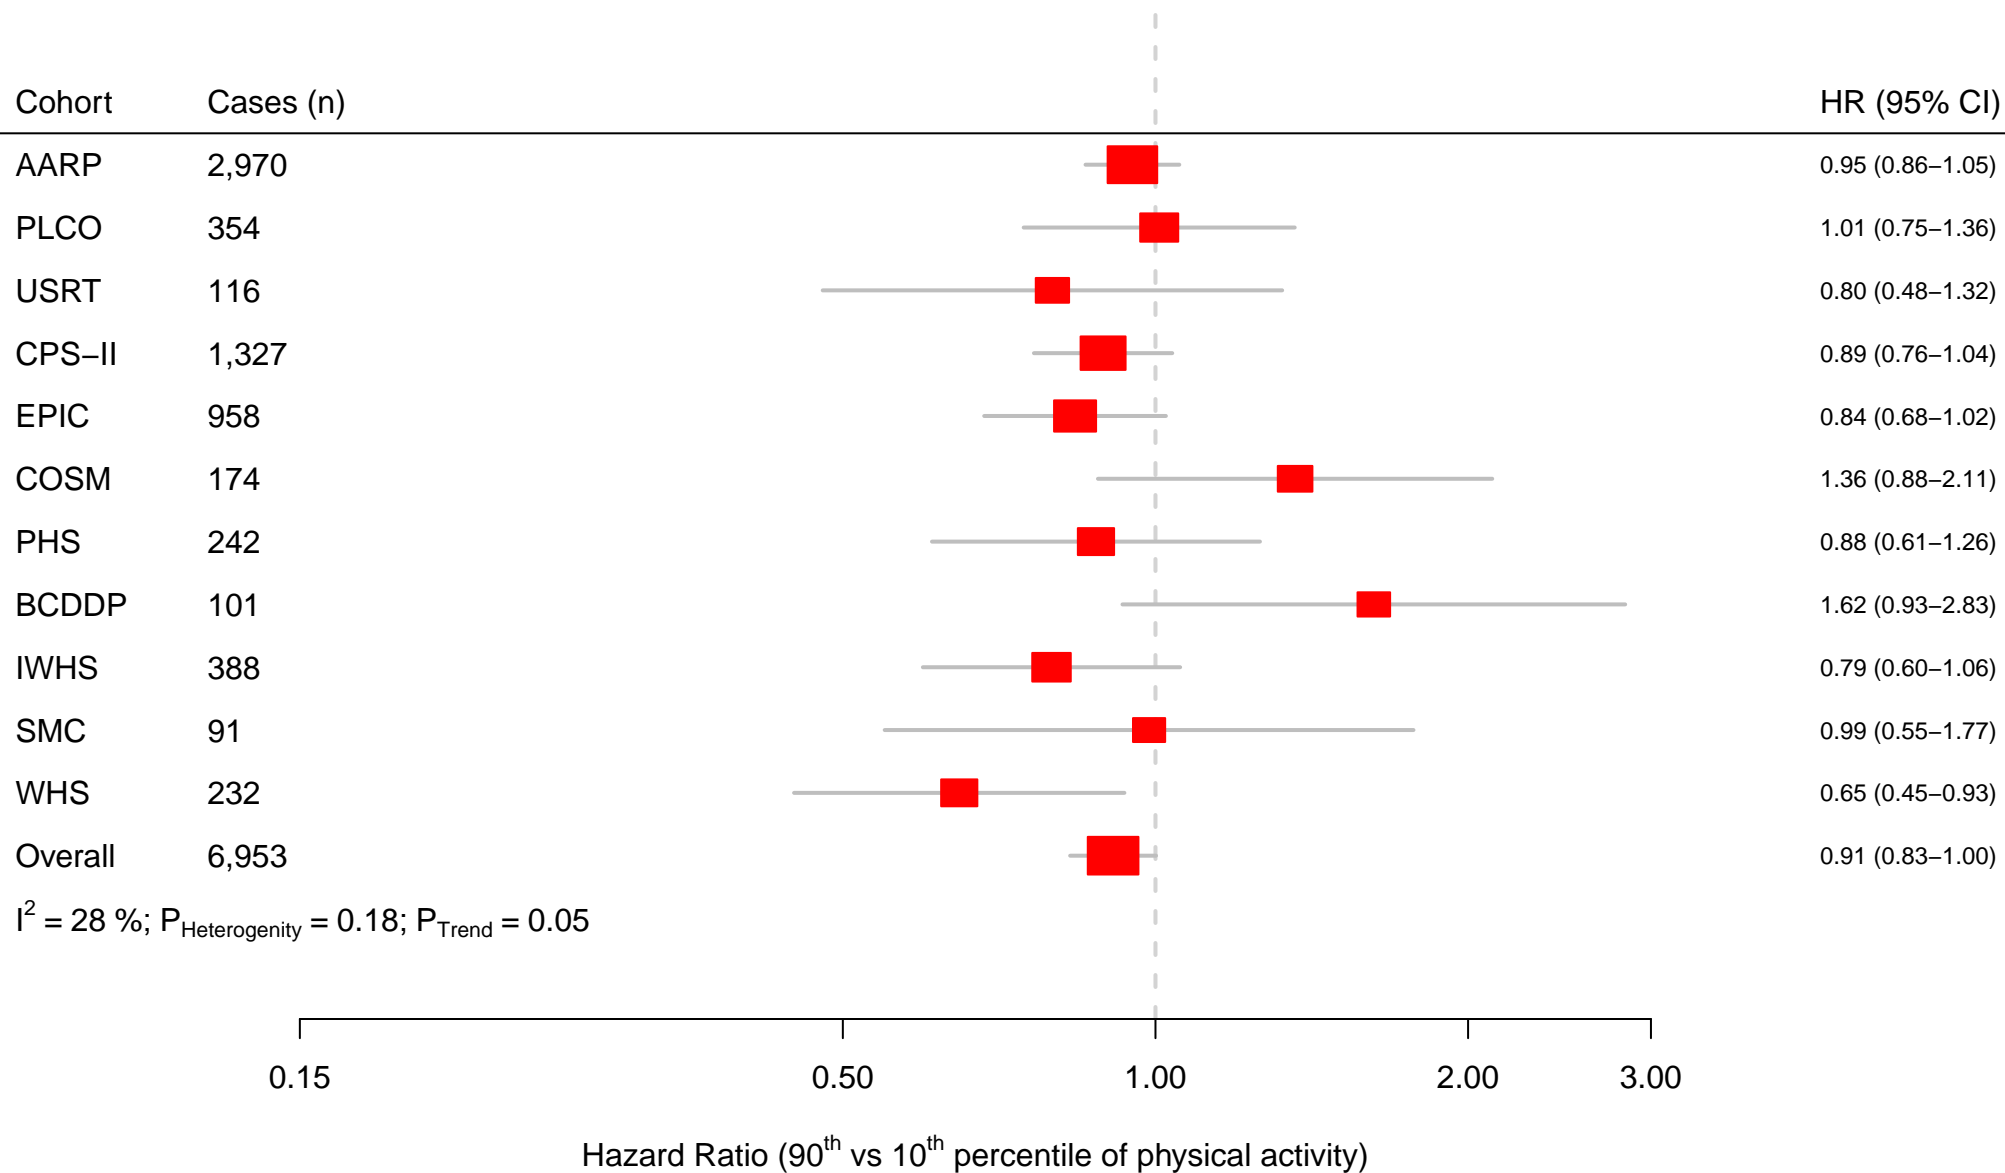

**eFigure 2r.** Physical activity and risk of thyroid cancer

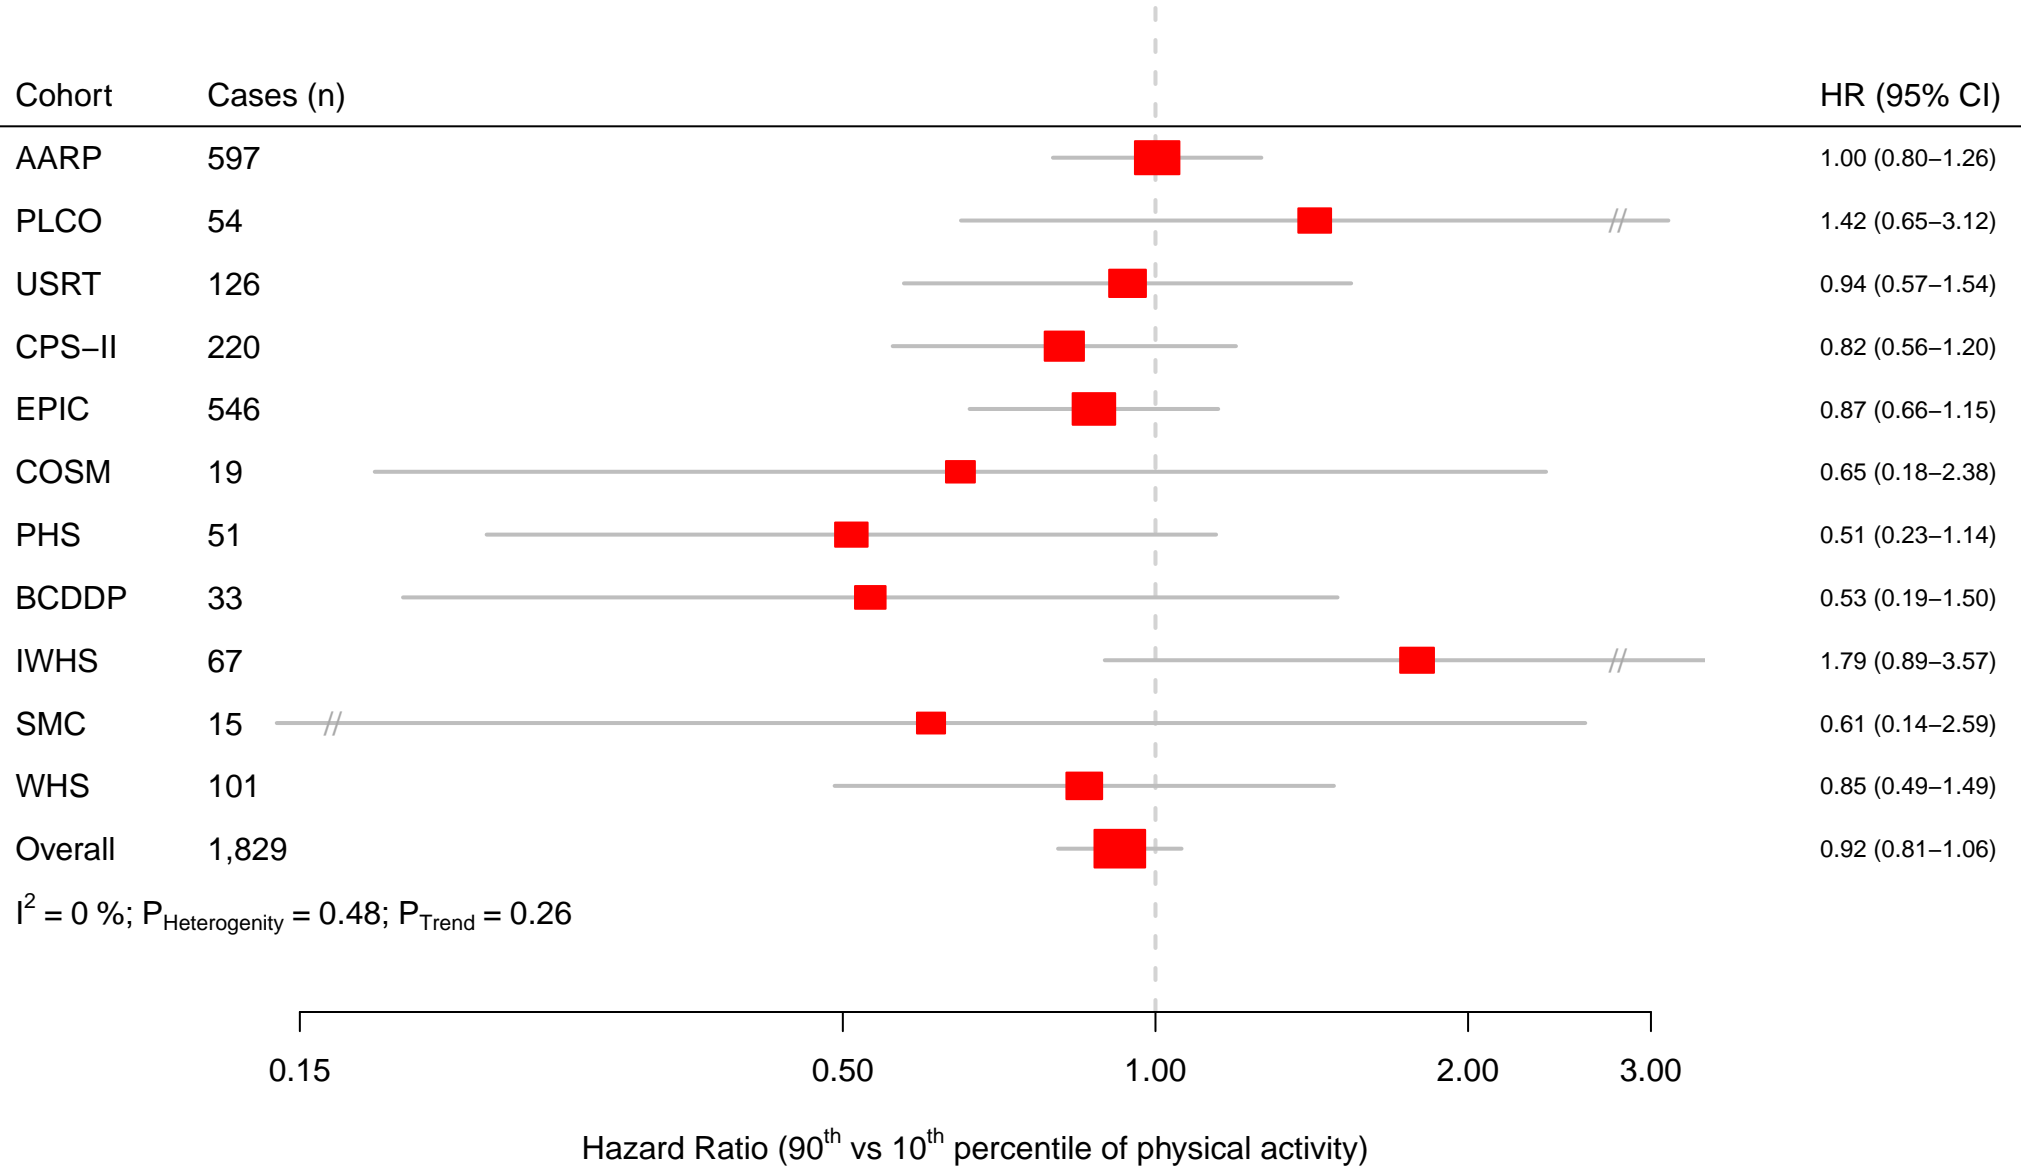

**eFigure 2s.** Physical activity and risk of gastric non–cardia cancer

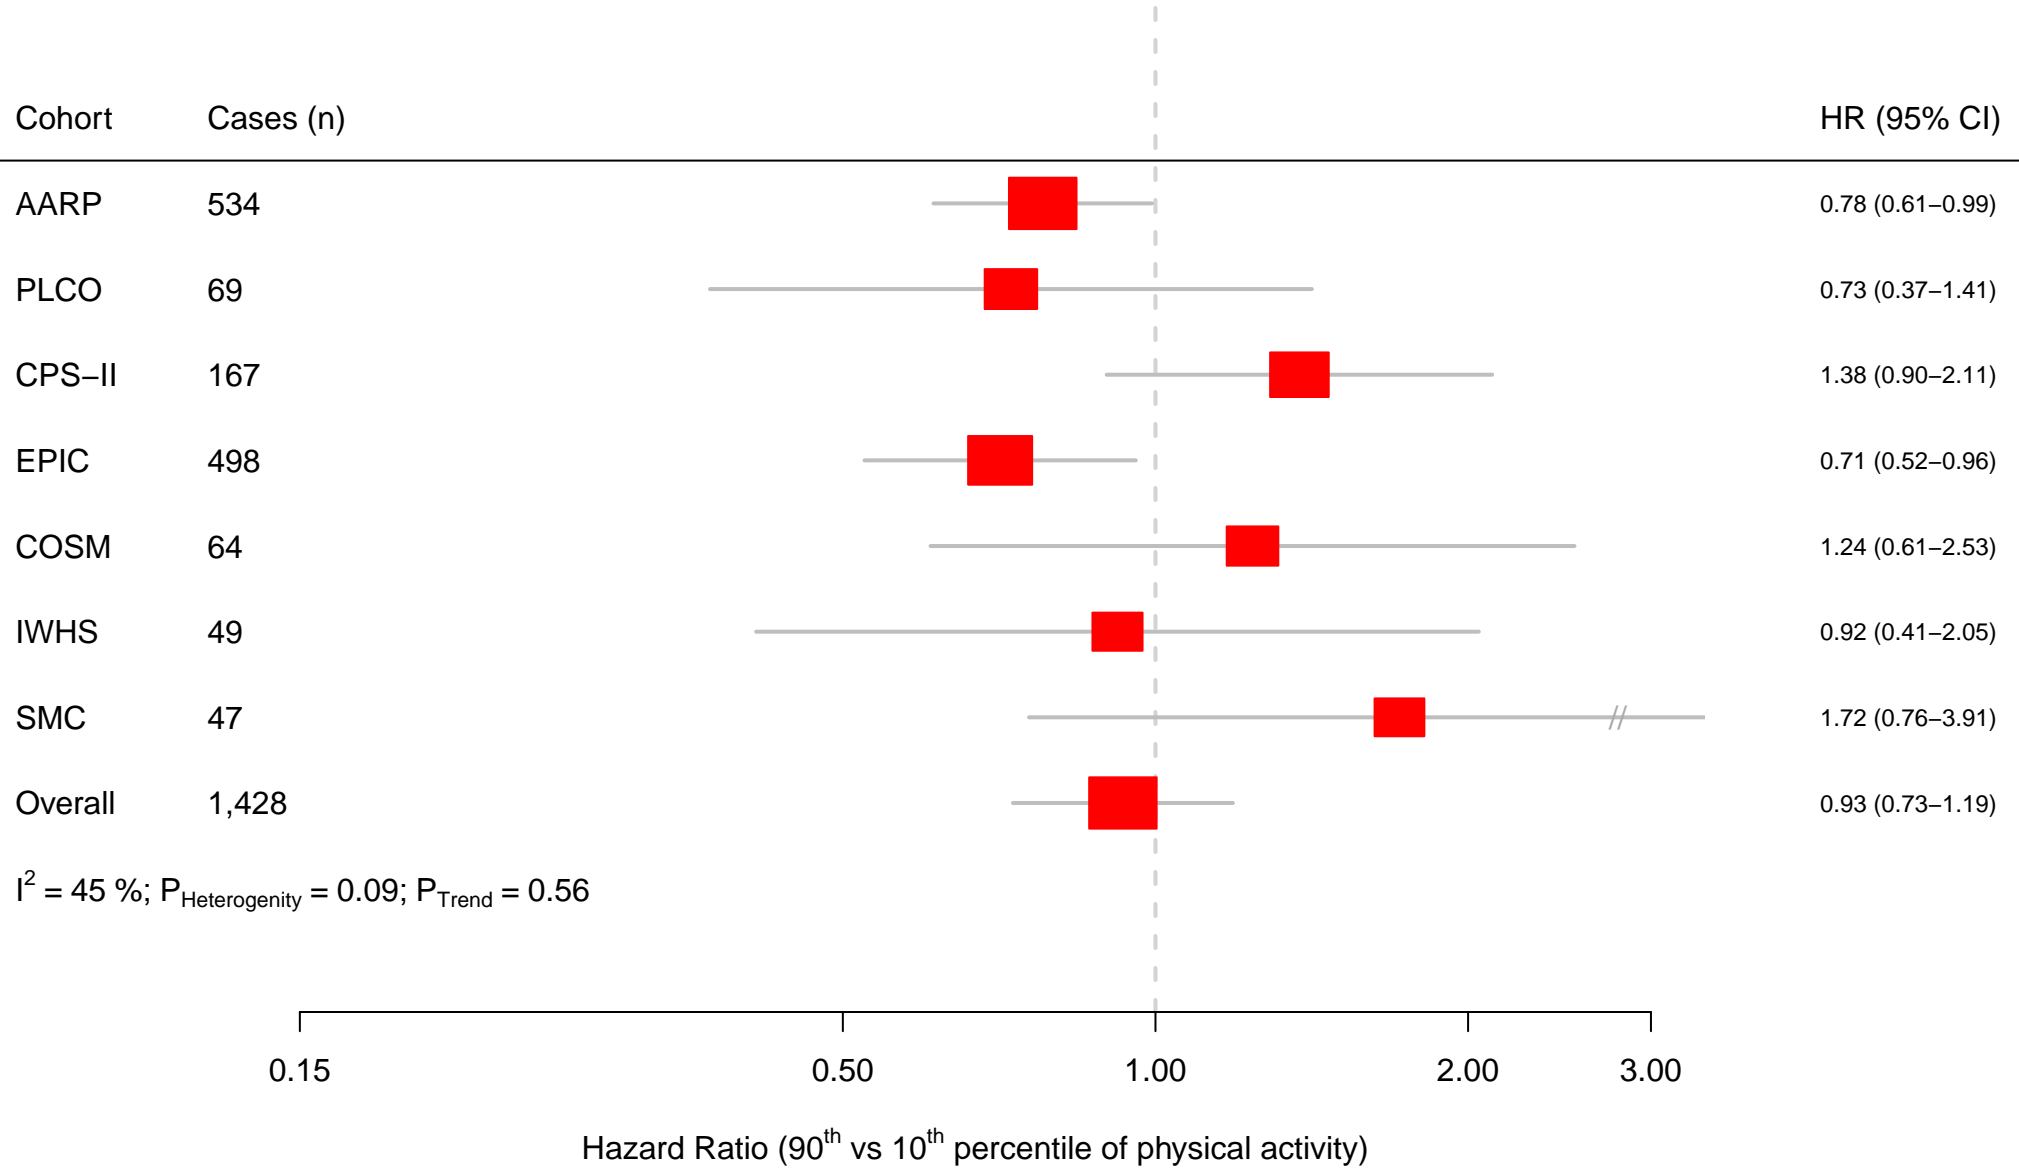

**eFigure 2t. Physical activity and risk of soft tissue cancer**

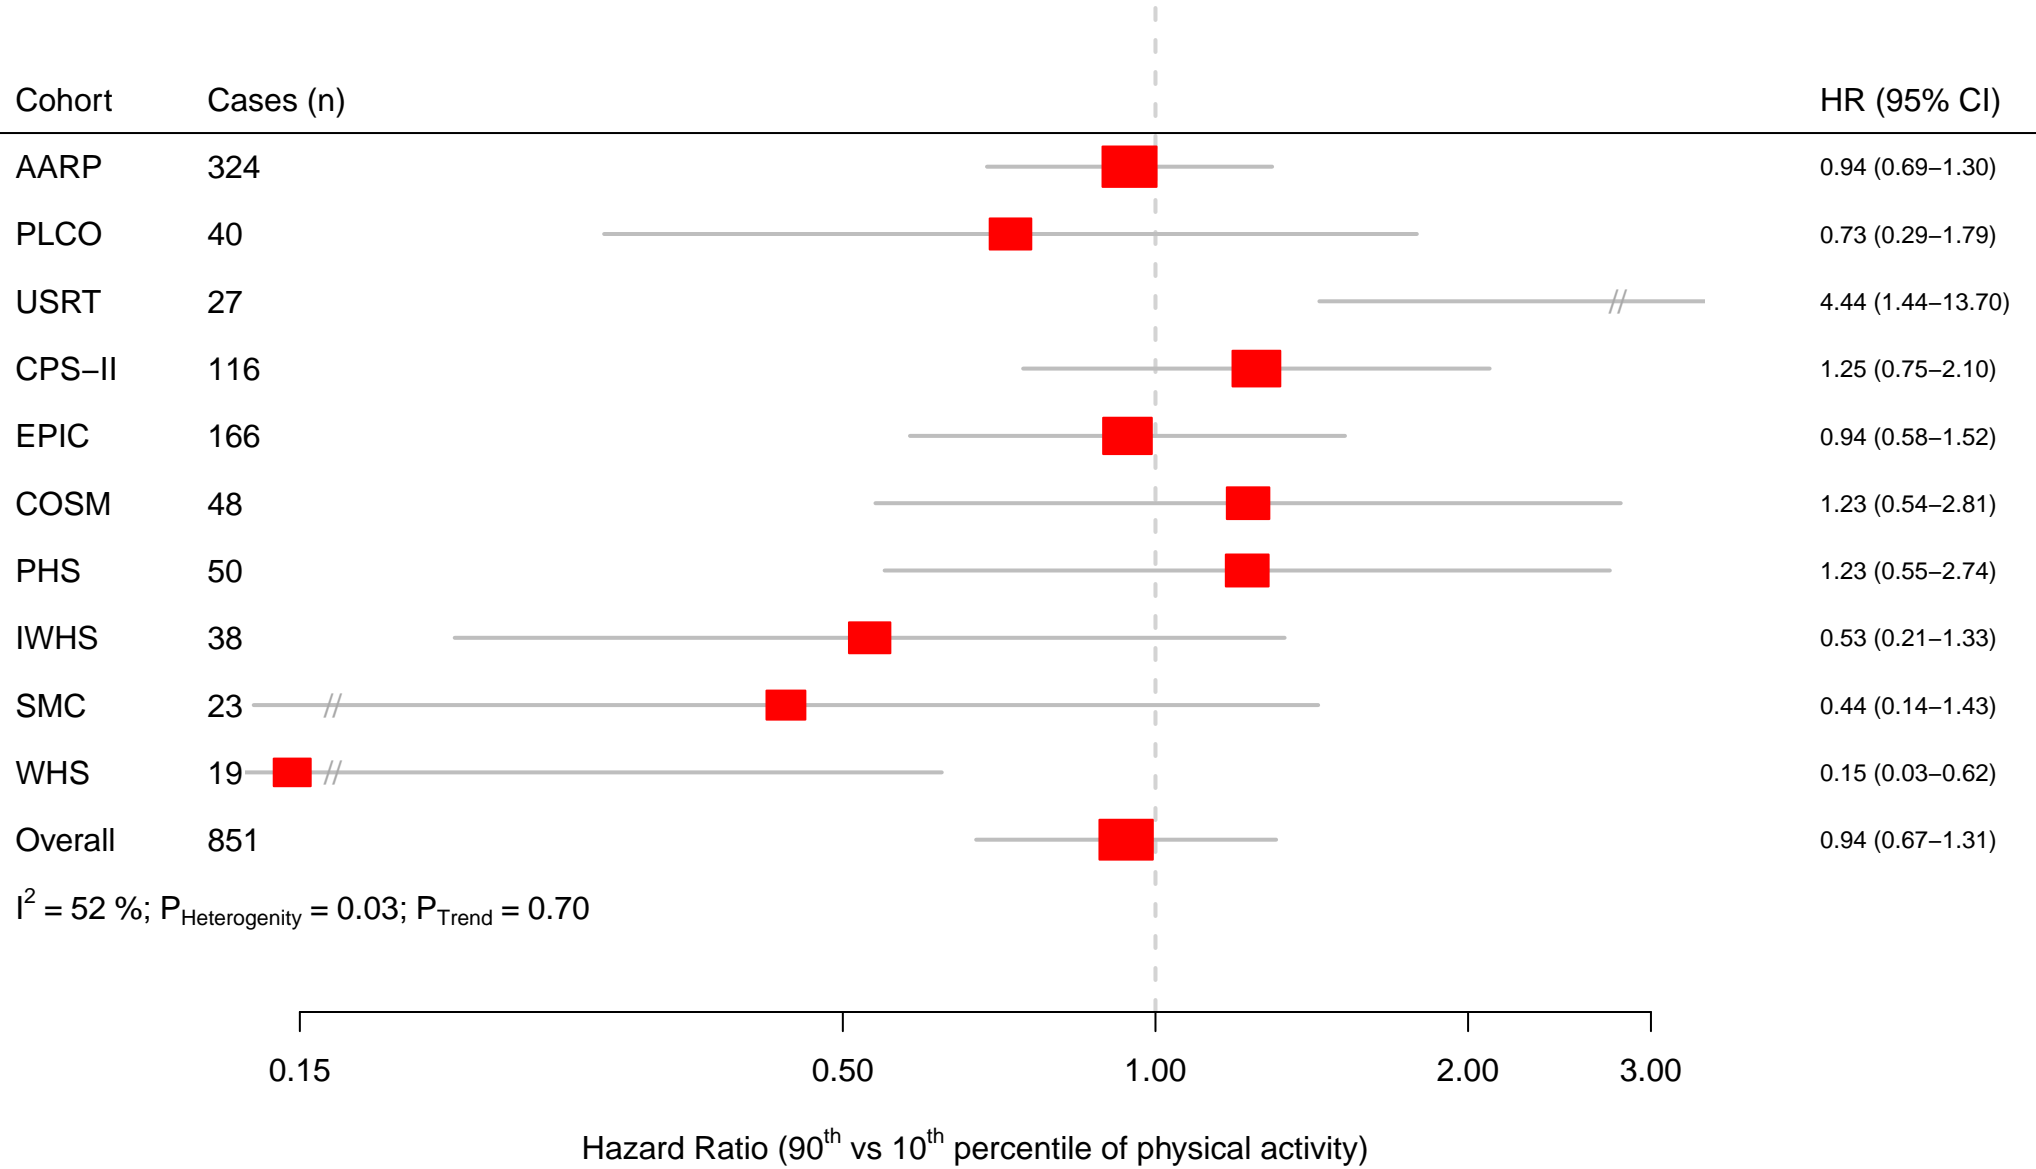

**eFigure 2u.** Physical activity and risk of pancreas cancer

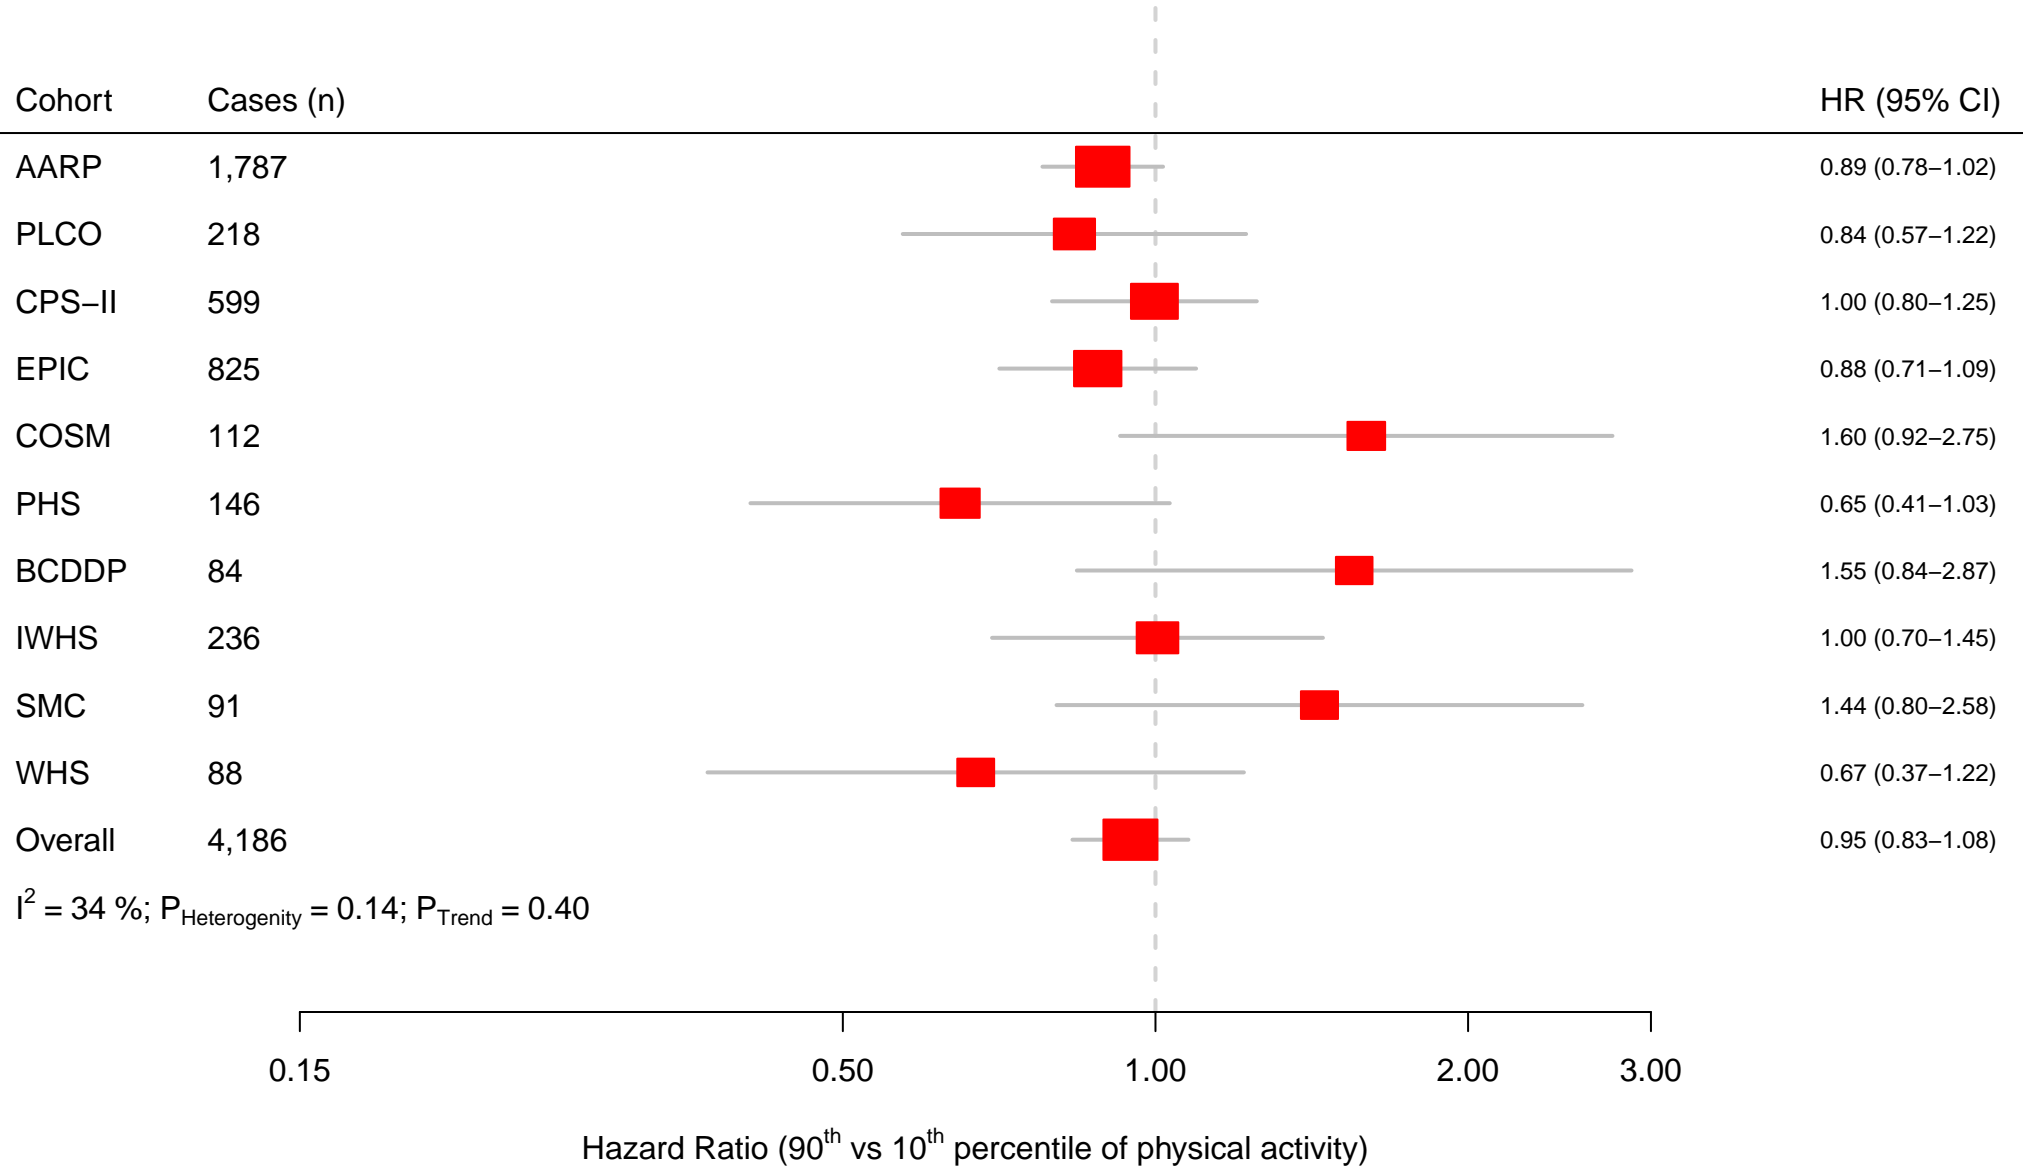



**eFigure 2v.** Physical activity and risk of lymphocytic leukemia

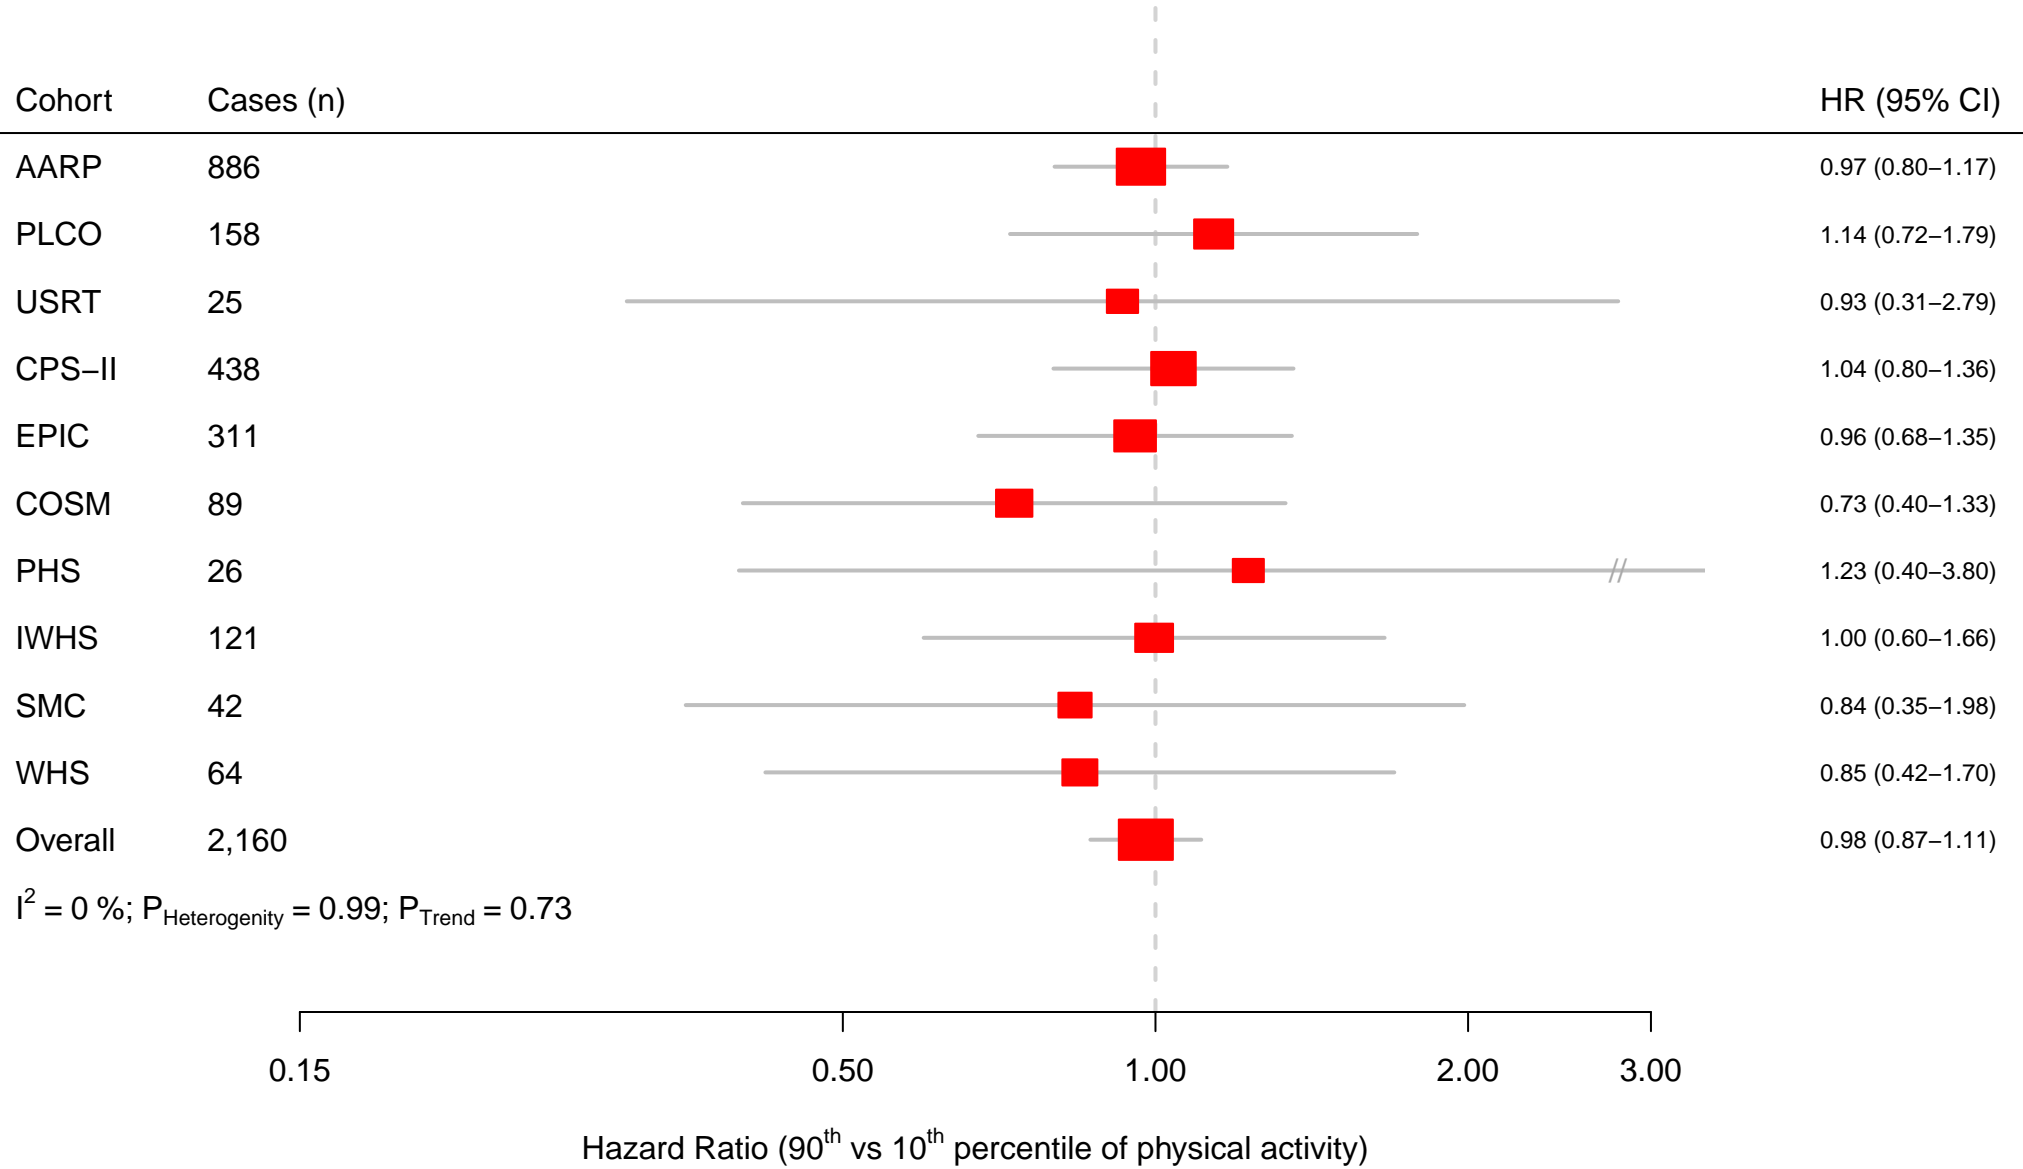

**eFigure 2w.** Physical activity and risk of ovary cancer

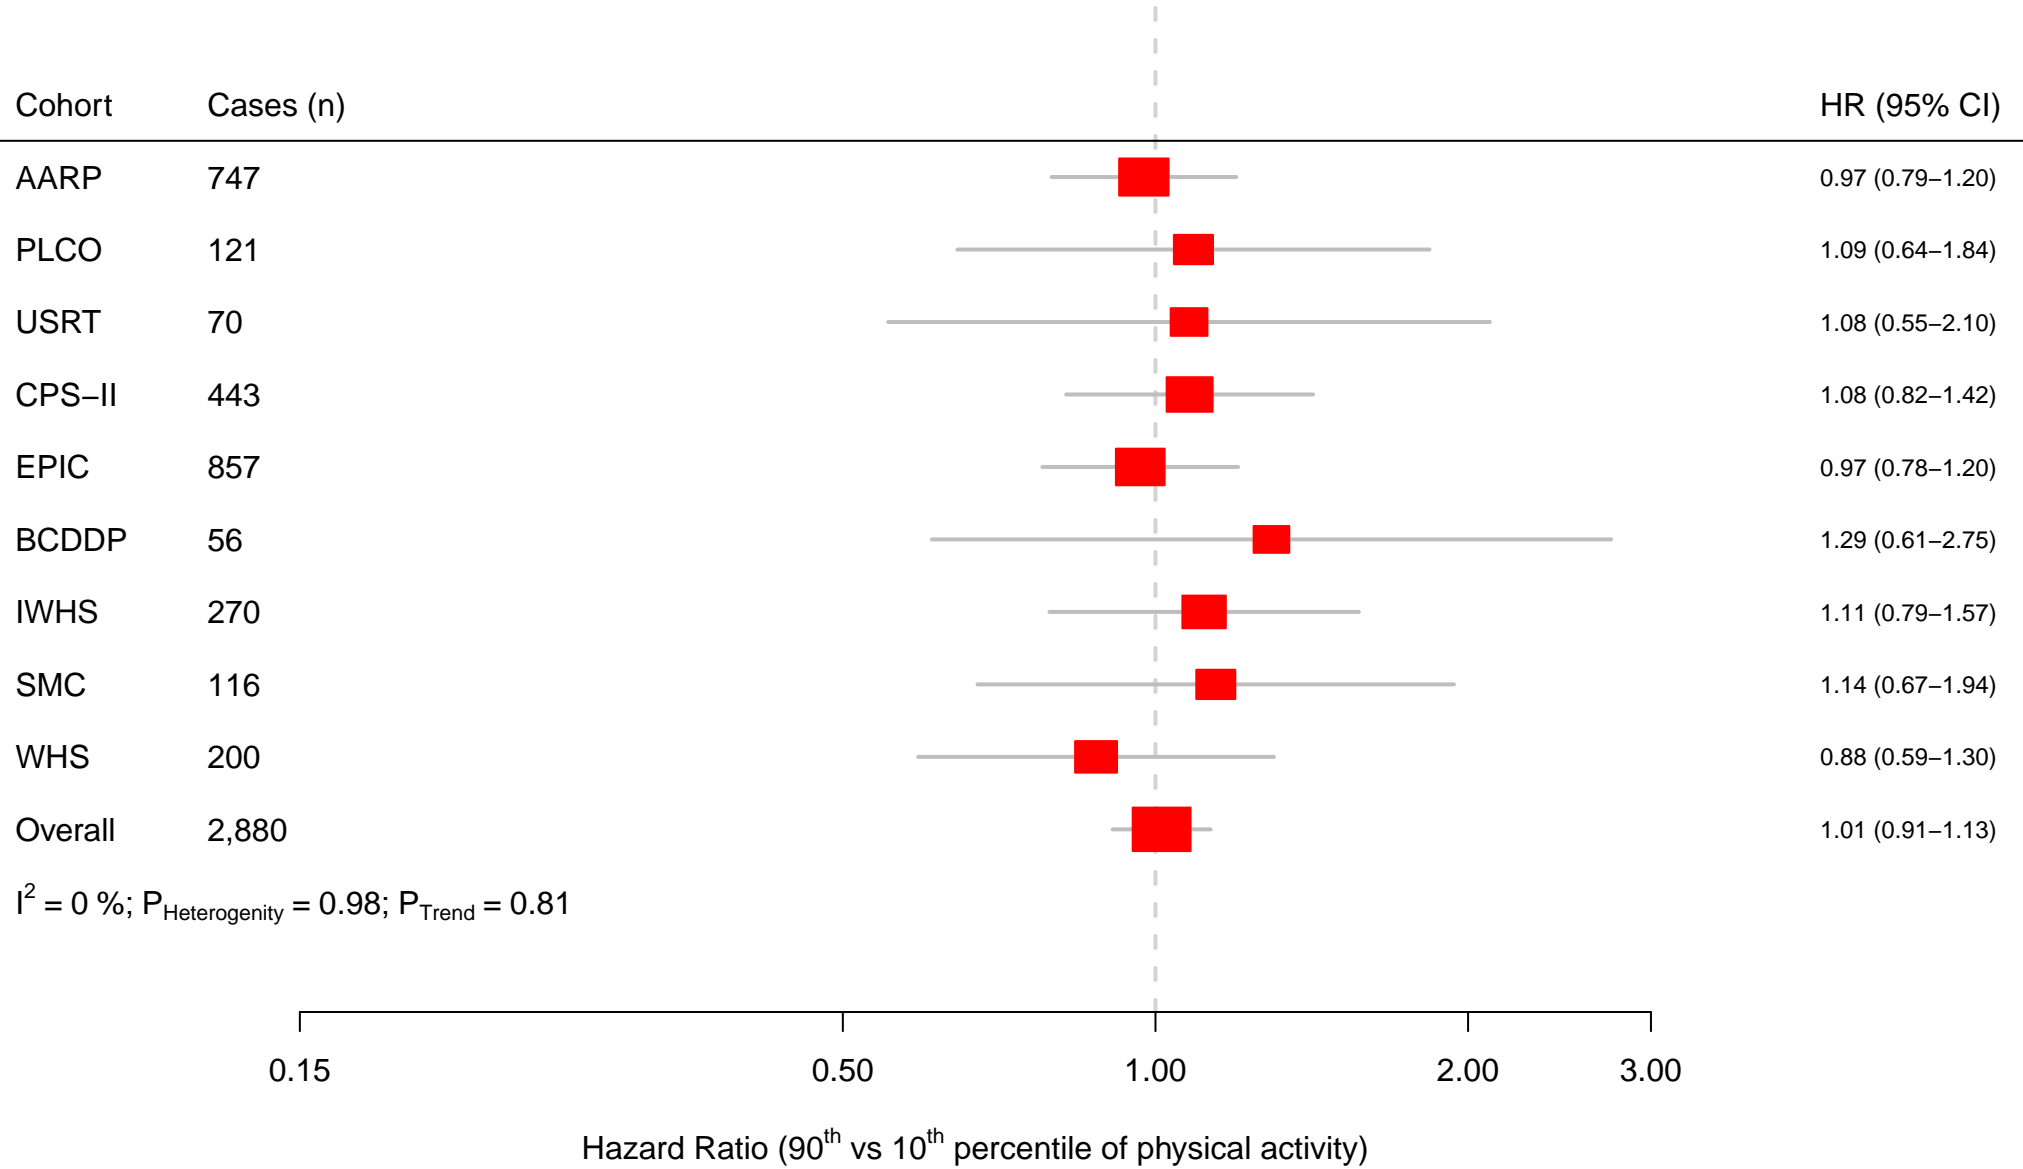

**eFigure 2x. Physical activity and risk of brain cancer**

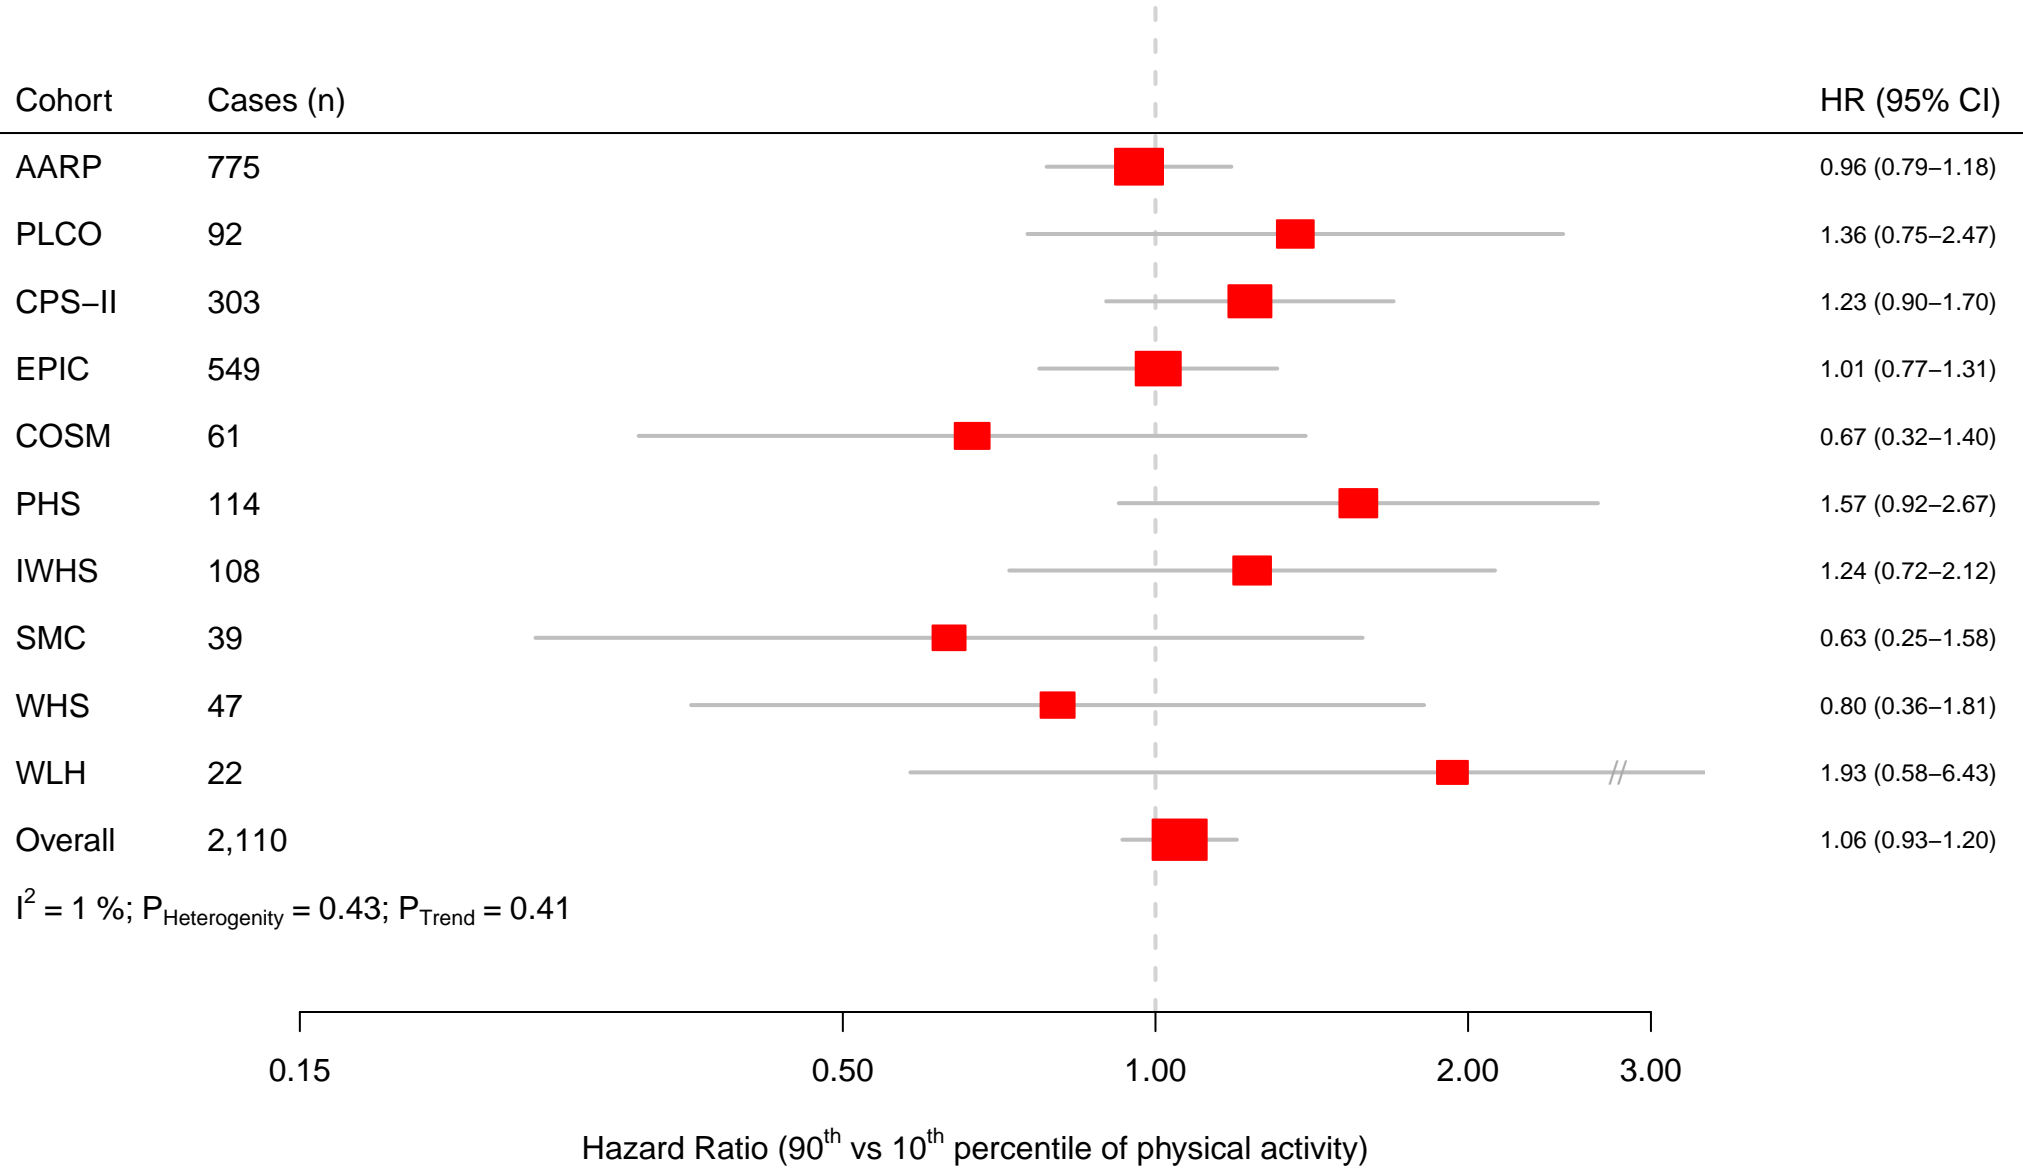

**eFigure 2y.** Physical activity and risk of prostate cancer

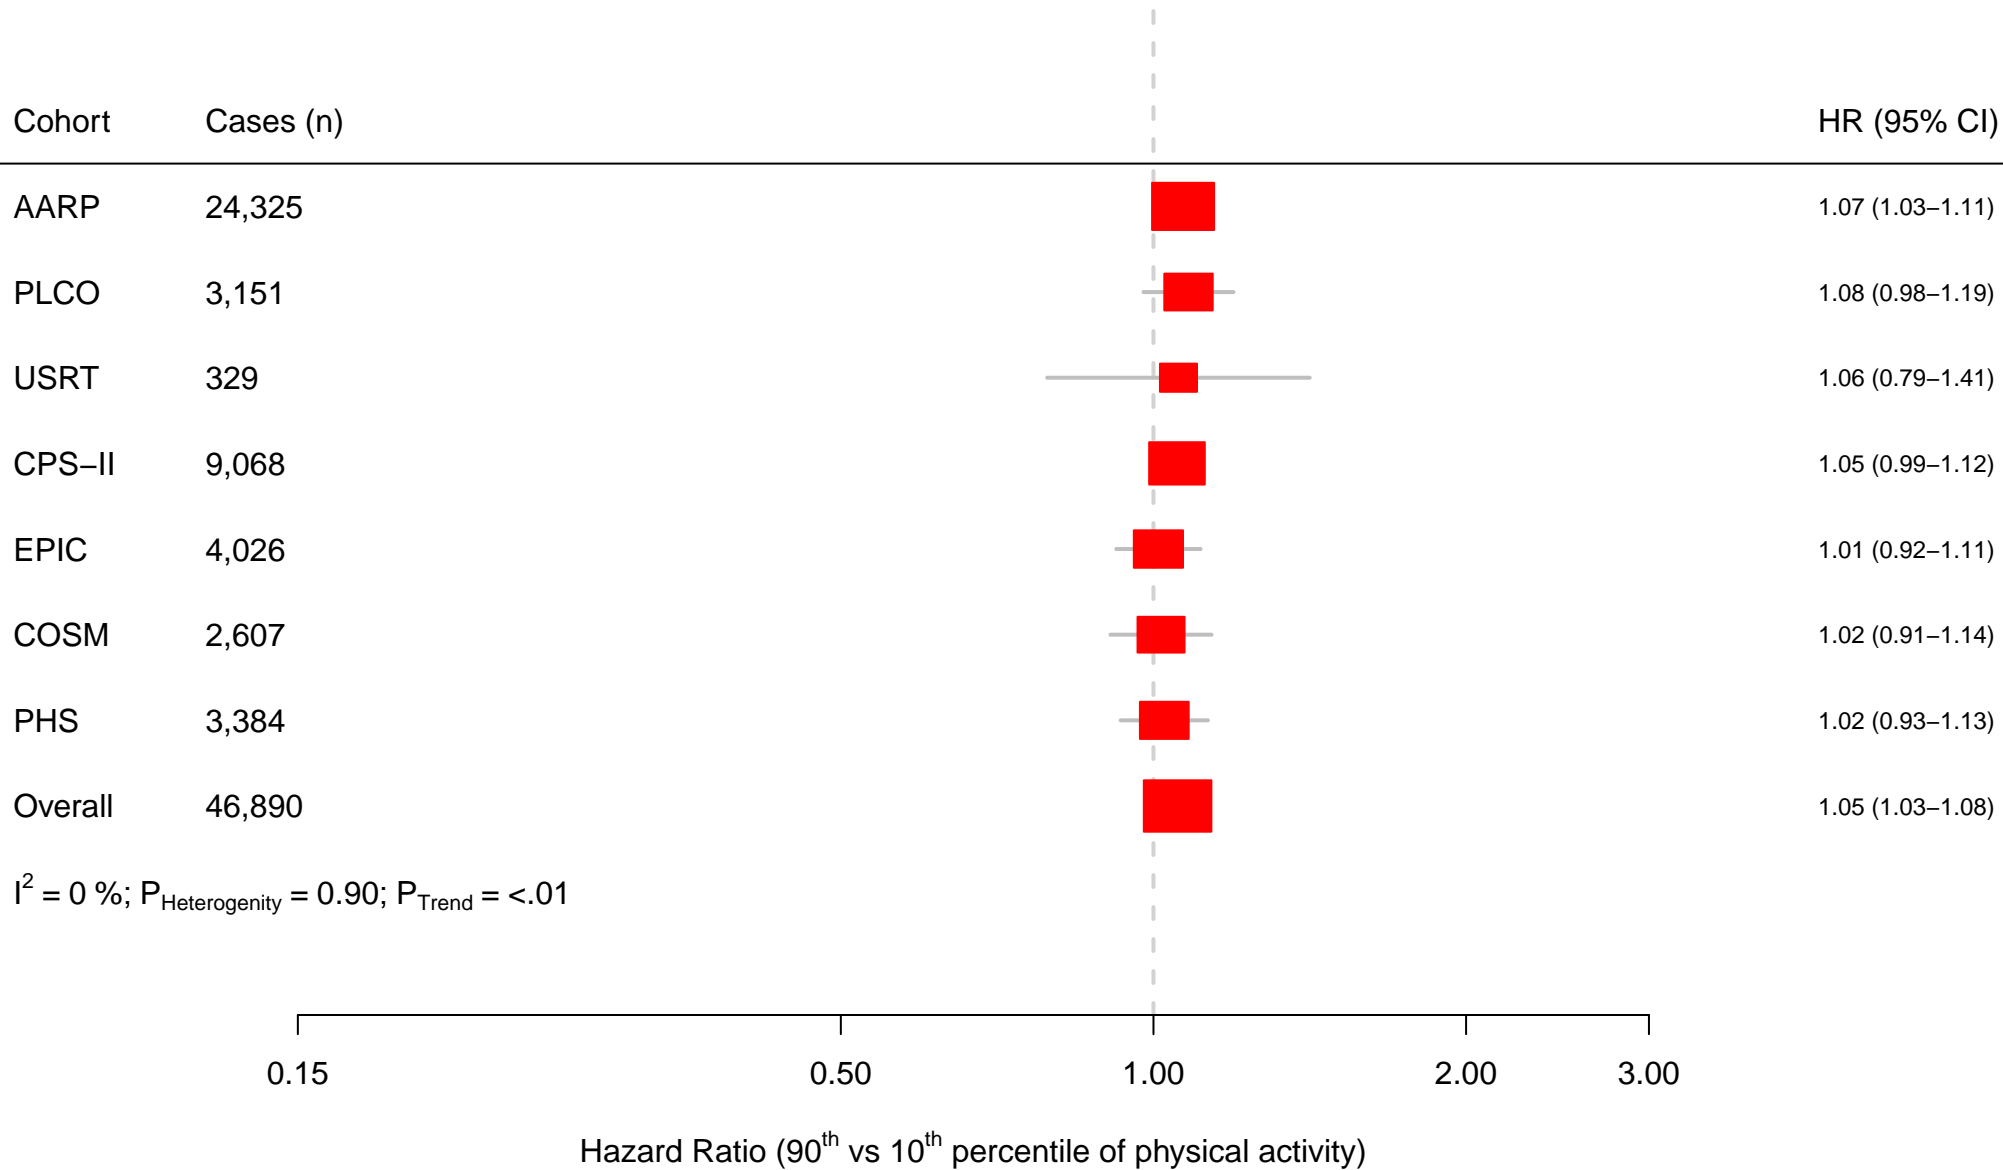

**eFigure 2z. Physical activity and risk of melanoma**

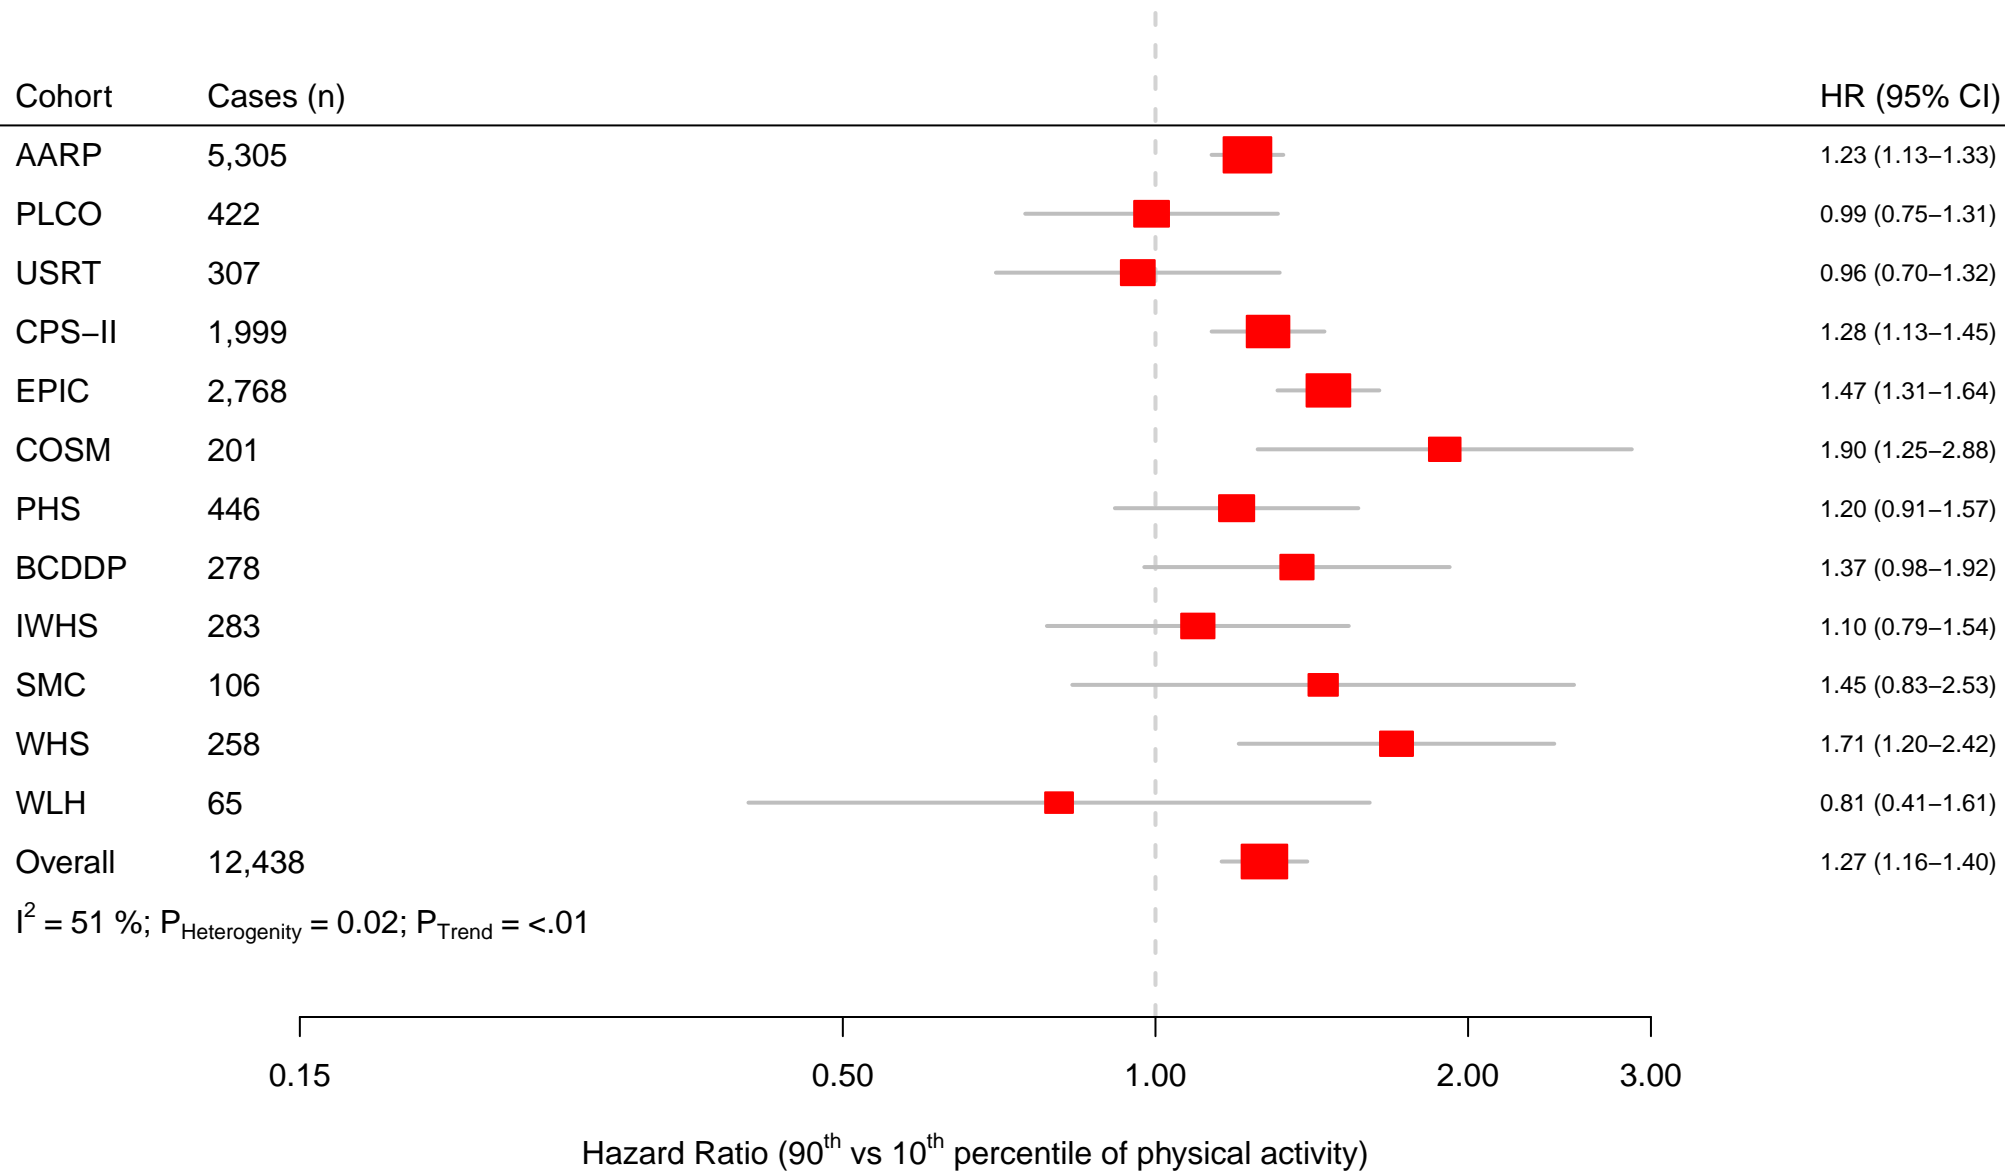

**eFigure 3.** Summary multivariable\* hazard ratios (HR) and 95% confidence intervals (CI) for a higher (90th percentile) versus lower (10th percentile) level of leisure-time physical activity, by cancer type†, with adjustment for BMI

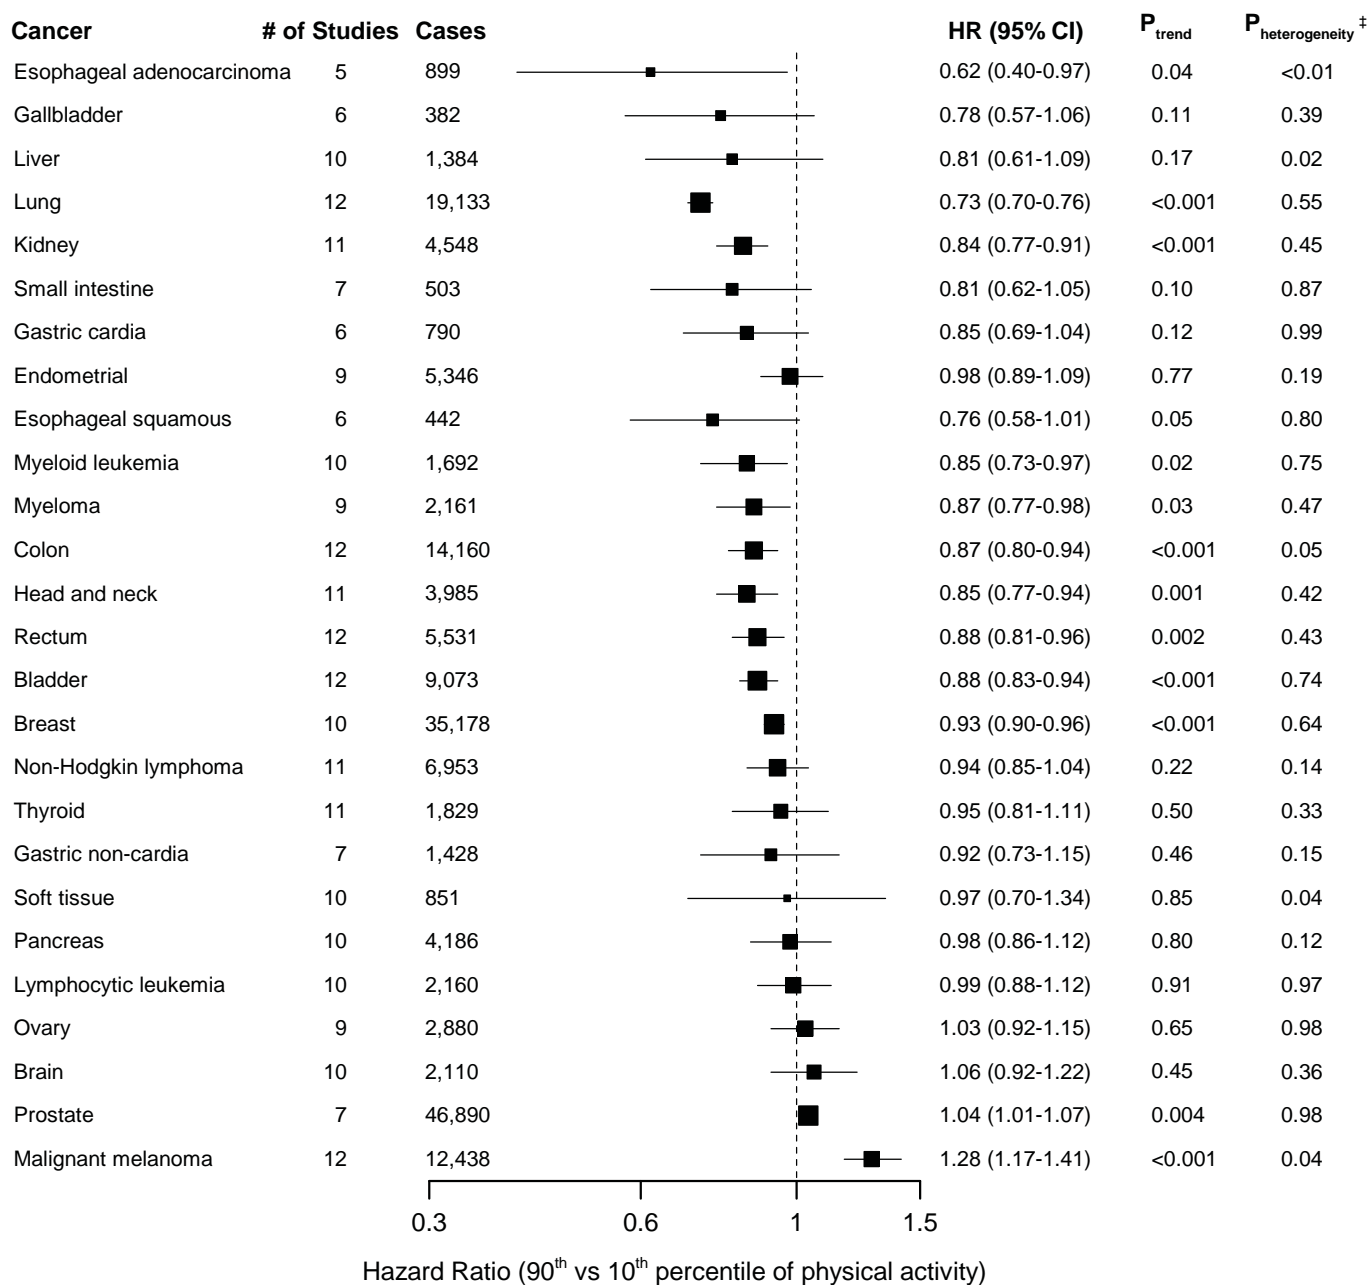

\* Multivariable models were adjusted for age, gender, smoking status (never, former, current), alcohol consumption (0, 0.1-14.9, 15.0-29.9 and 30.0+ g/day), education (did not complete high school, completed high school, post high-school training, some college, completed college), and race/ethnicity (white, black, other), and body mass index (<18.5, 18.5-24.9, 25.0-29.9, 30-34.9, 35.0-39.9, 40+ kg/m<sup>2</sup>). Models for endometrial, breast, and ovarian cancers are additionally adjusted for hormone replacement therapy use (ever, never), oral contraceptive use (ever, never), age at menarche (<10 years, 10-11 years, 12-13 years, 14+ years), age at menopause (premenopausal, 40-44 years, 45-49 years, 50-54 years, 55+ years), and parity (0 children, 1 child, 2 children, 3+ children).

† The Surveillance Epidemiology and End Results site recode and the International Classification of Diseases for Oncology, Third Edition code corresponding to each cancer type are shown in Supplementary Table 1.

‡ P<sub>heterogeneity</sub> indicates the P-value for heterogeneity of hazard ratios across participating studies.

**eFigure 4.** Summary multivariable\* hazard ratios (HR) and 95% confidence intervals (CI) for a higher (90th percentile) versus lower (10th percentile) level of leisure-time physical activity, by cancer type, stratified by geographic region, United States or Europe.

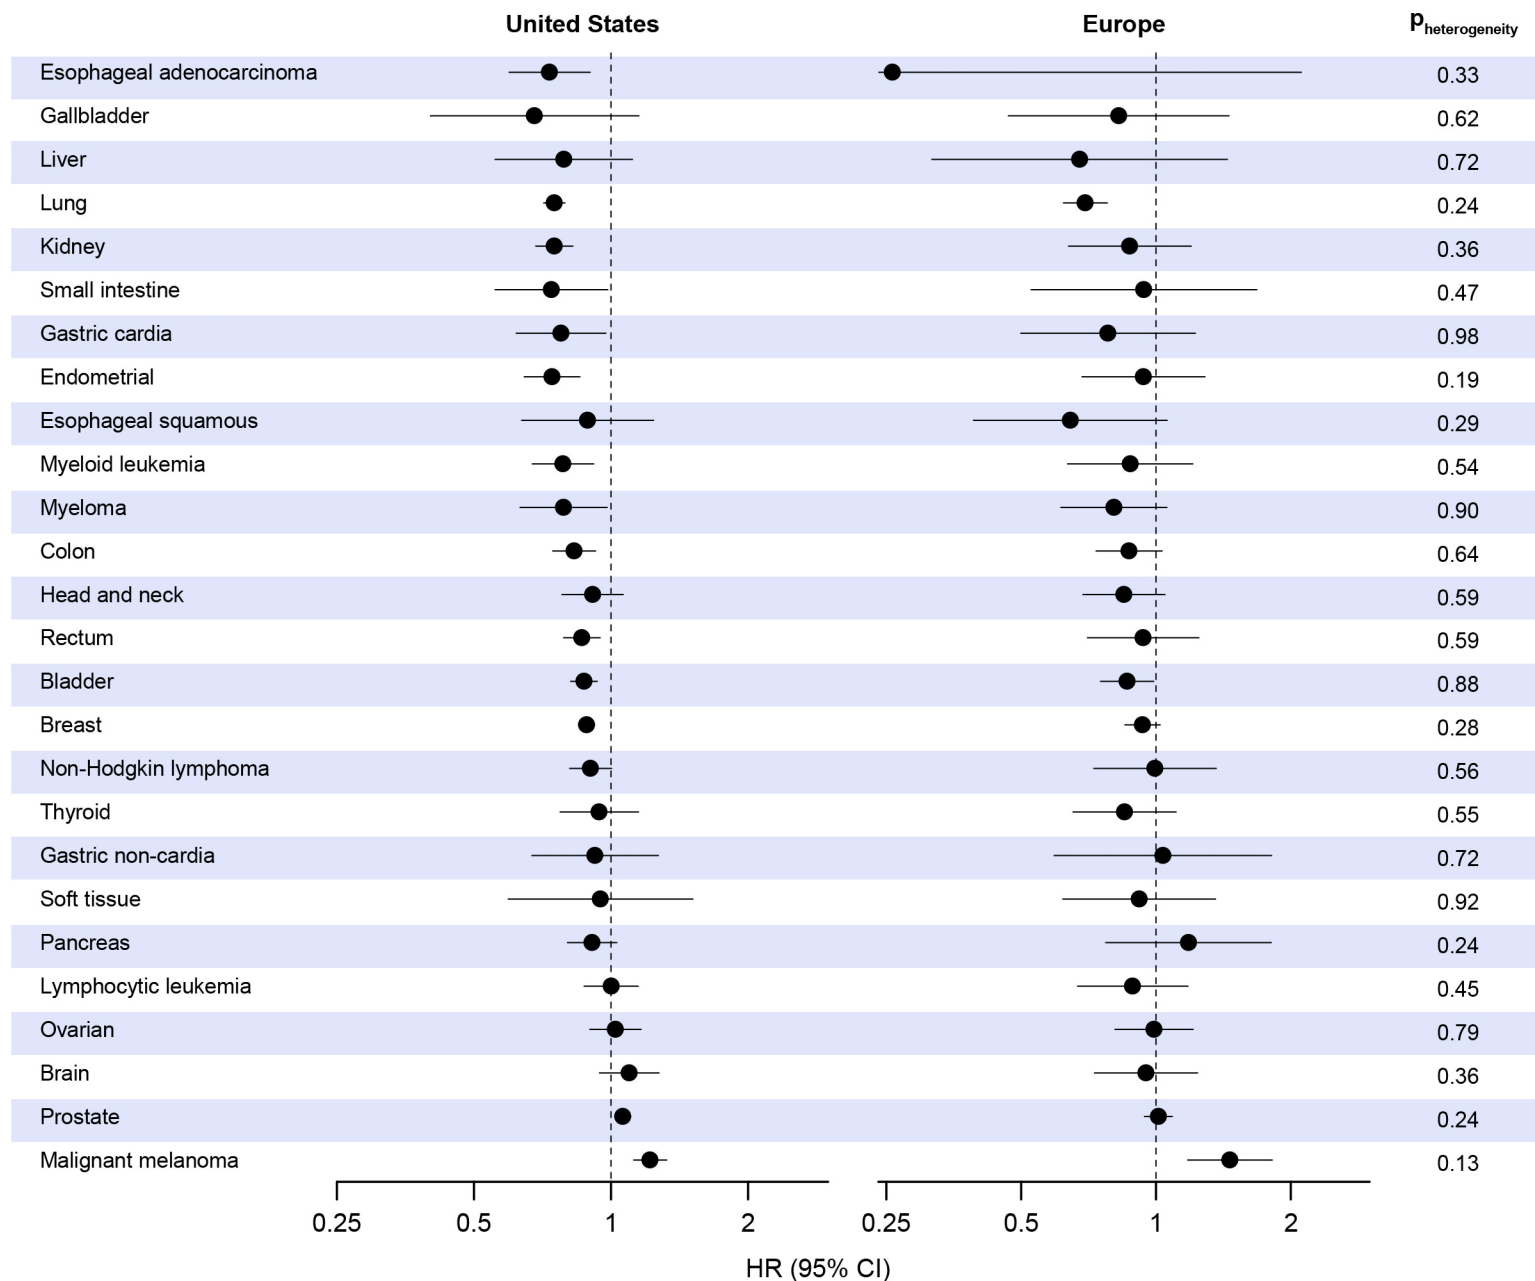

\* All models were adjusted for age, gender, smoking status (never, former, current), alcohol consumption (0, 0.1-14.9, 15.0-29.9 and 30.0+ g/day), education (did not complete high school, completed high school, post high-school training, some college, completed college), and race/ethnicity (white, black, other). Models for endometrial, breast, and ovarian cancers are additionally adjusted for oral contraceptive use (ever, never), age at menarche (<10 years, 10-11 years, 12-13 years, 14+ years), age at menopause (premenopausal, 40-44 years, 45-49 years, 50-54 years, 55+ years), and parity (0 children, 1 child, 2 children, 3+ children).

**eFigure 5.** Summary multivariable\* hazard ratios (HR) and 95% confidence intervals (CI) for a higher (90th percentile) versus lower (10th percentile) level of leisure-time physical activity, by cancer type, stratified by history of hormone replacement therapy, never users or ever users.

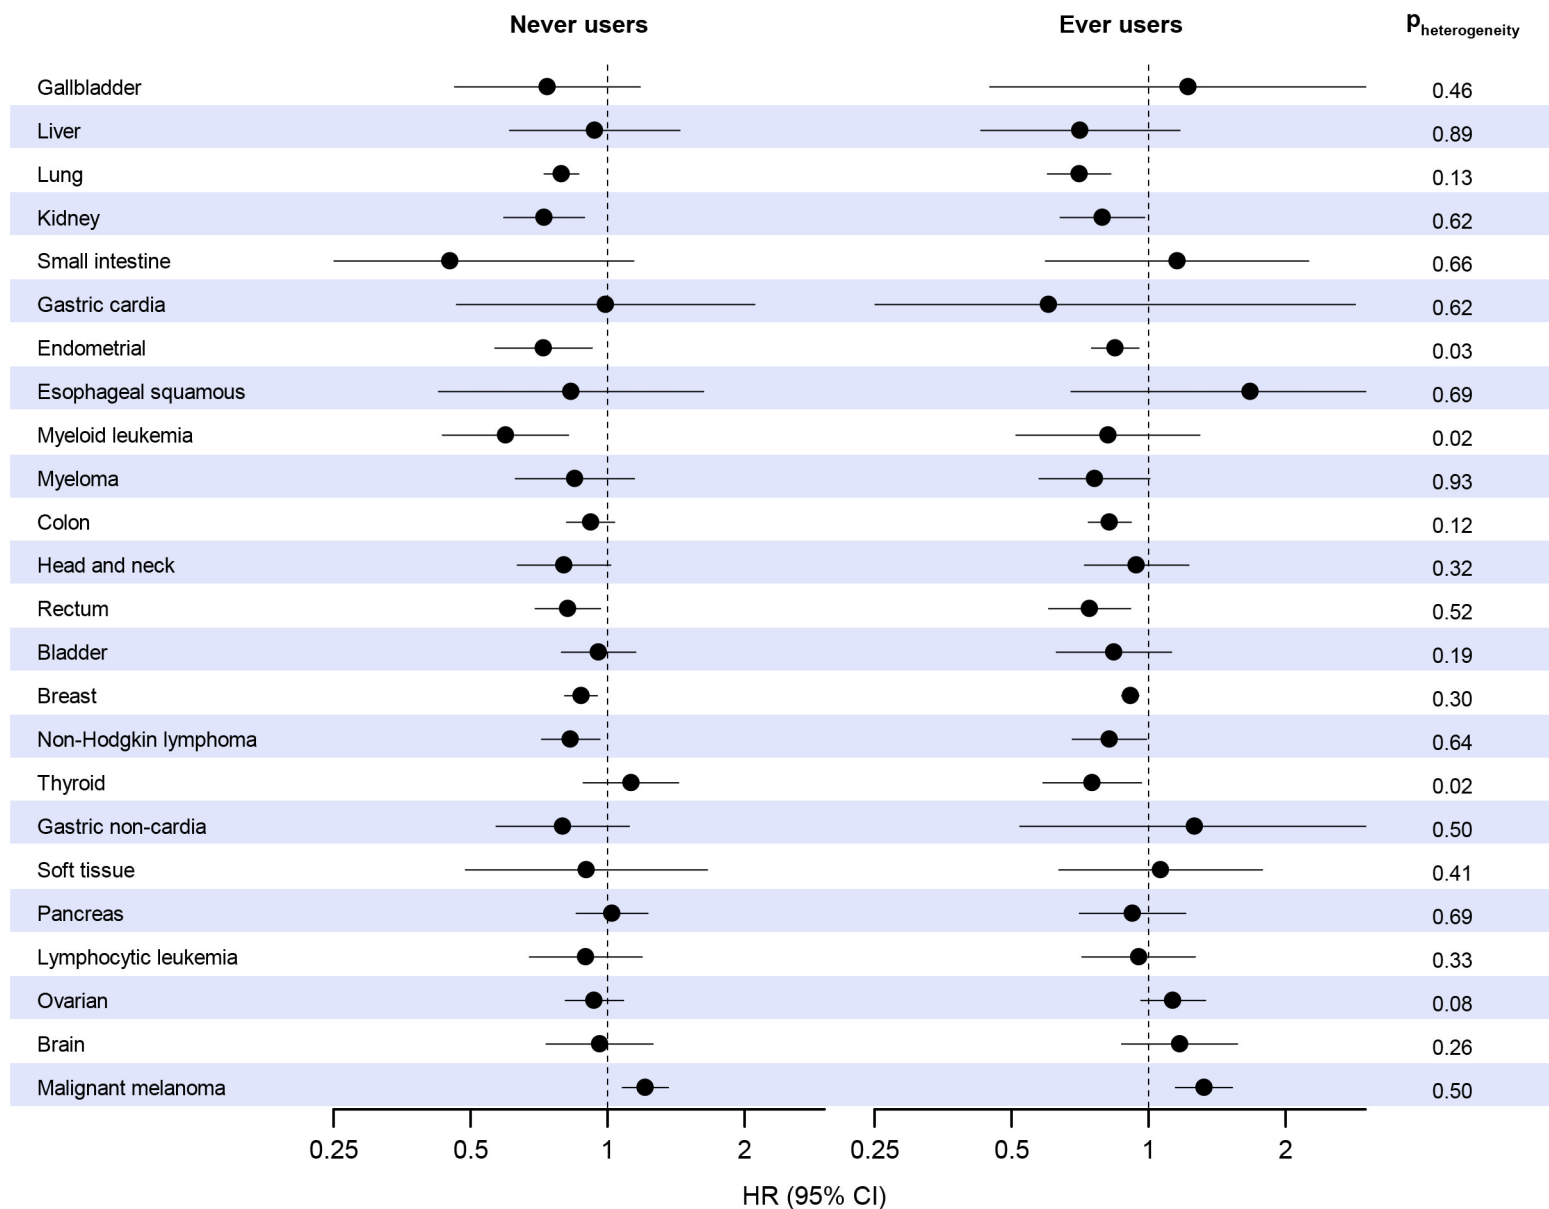

\* All models were adjusted for age, gender, smoking status (never, former, current), alcohol consumption (0, 0.1-14.9, 15.0-29.9 and 30.0+ g/day), education (did not complete high school, completed high school, post high-school training, some college, completed college), and race/ethnicity (white, black, other). Models for endometrial, breast, and ovarian cancers are additionally adjusted for oral contraceptive use (ever, never), age at menarche (<10 years, 10-11 years, 12-13 years, 14+ years), age at menopause (premenopausal, 40-44 years, 45-49 years, 50-54 years, 55+ years), and parity (0 children, 1 child, 2 children, 3+ children).



**eFigure 6.** Summary multivariable\* hazard ratios (HR) and 95% confidence intervals (CI) for a higher (90th percentile) versus lower (10th percentile) level of leisure-time physical activity, by cancer type, stratified by gender.

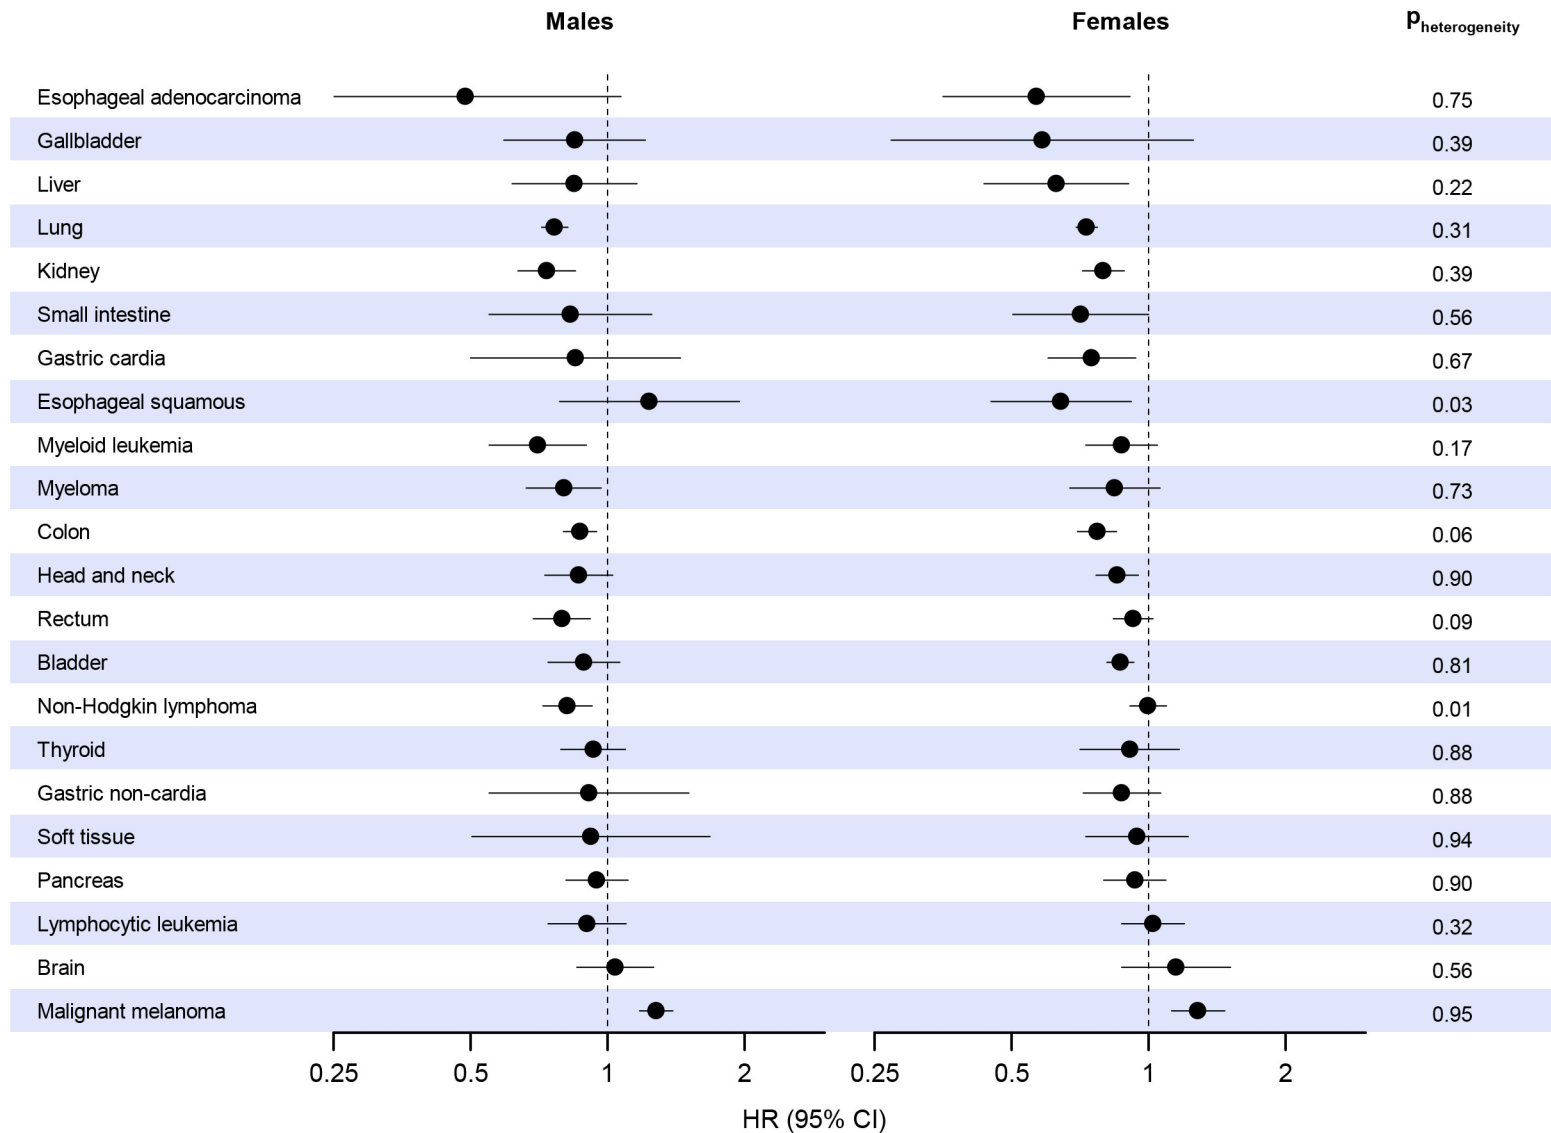

\* All models were adjusted for age, smoking status (never, former, current), alcohol consumption (0, 0.1-14.9, 15.0-29.9 and 30.0+ g/day), education (did not complete high school, completed high school, post high-school training, some college, completed college), and race/ethnicity (white, black, other).

**eFigure 7.** Summary multivariable\* hazard ratios (HR) and 95% confidence intervals (CI) for a higher (90th percentile) versus lower (10th percentile) level of leisure-time physical activity, by cancer type, stratified by race/ethnicity†.

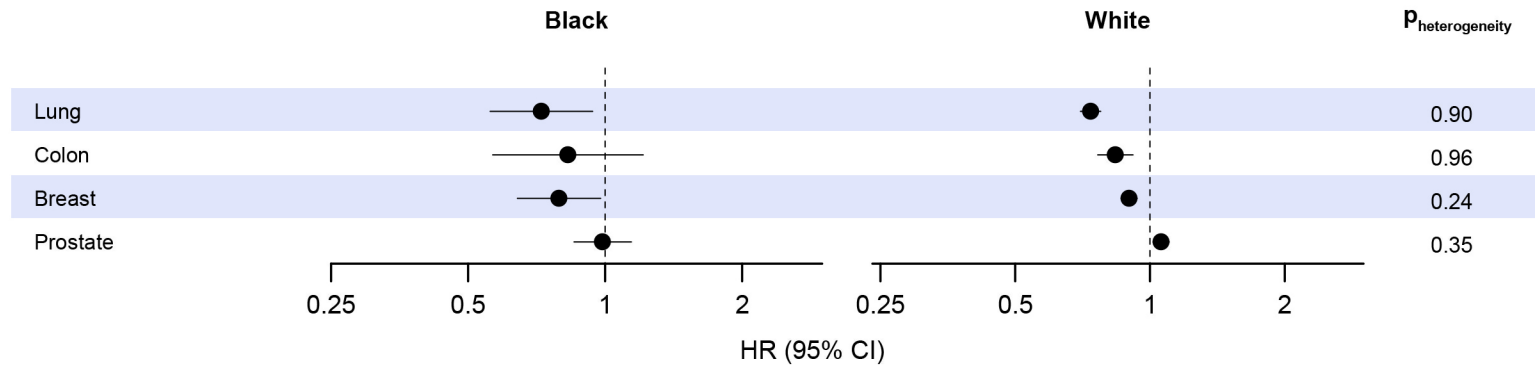

\* All models were adjusted for age, gender, smoking status (never, former, current), alcohol consumption (0, 0.1-14.9, 15.0-29.9 and 30.0+ g/day), education (did not complete high school, completed high school, post high-school training, some college, completed college), and race/ethnicity (white, black, other). Models for endometrial, breast, and ovarian cancers are additionally adjusted for hormone replacement therapy use (ever, never), oral contraceptive use (ever, never), age at menarche (<10 years, 10-11 years, 12-13 years, 14+ years), age at menopause (premenopausal, 40-44 years, 45-49 years, 50-54 years, 55+ years), and parity (0 children, 1 child, 2 children, 3+ children).

† Black and white participants only; case numbers for other race/ethnicity groups too small for analysis. Restricted to cancer types with at least 100 cases total among Blacks.

**eFigure 8.** Summary multivariable\* hazard ratios (HR) and 95% confidence intervals (CI) for a higher (90th percentile) versus lower (10th percentile) level of leisure-time physical activity, by cancer type, stratified by period of follow-up.

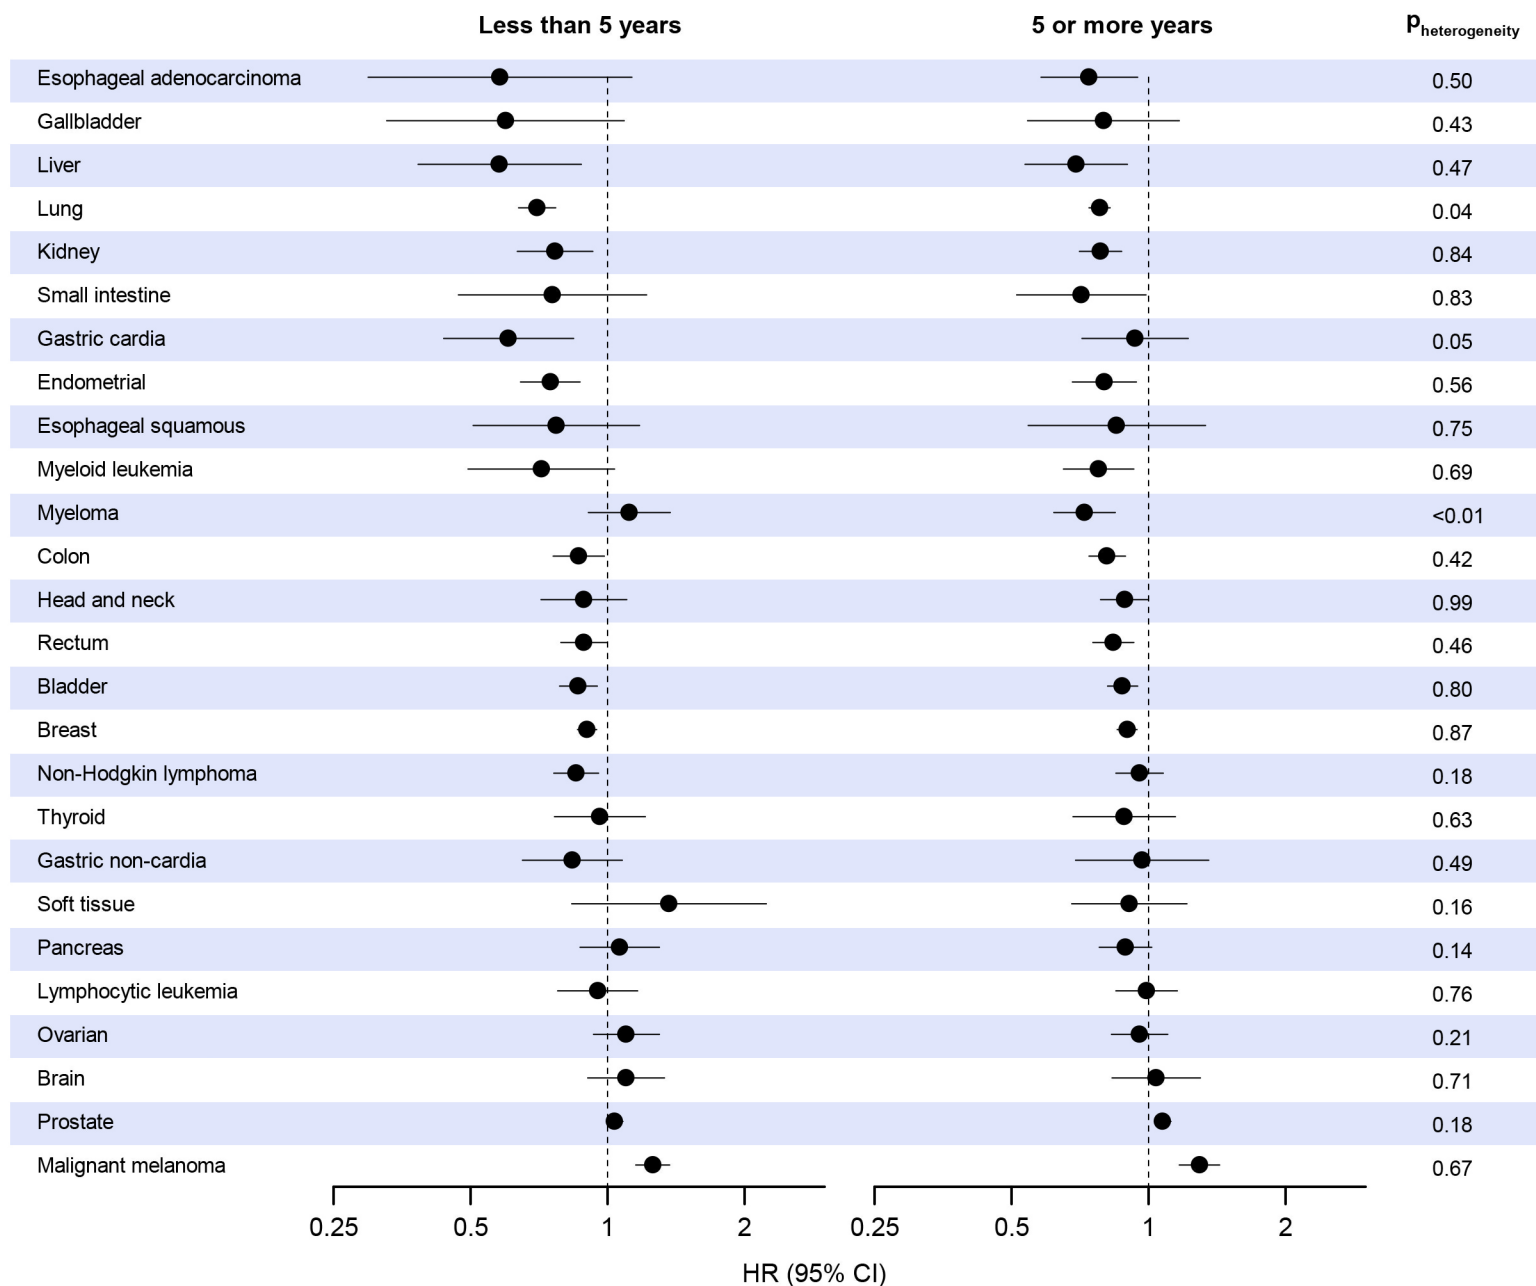

\* All models were adjusted for age, gender, smoking status (never, former, current), alcohol consumption (0, 0.1-14.9, 15.0-29.9 and 30.0+ g/day), education (did not complete high school, completed high school, post high-school training, some college, completed college), and race/ethnicity (white, black, other). Models for endometrial, breast, and ovarian cancers are additionally adjusted for hormone replacement therapy use (ever, never), oral contraceptive use (ever, never), age at menarche (<10 years, 10-11 years, 12-13 years, 14+ years), age at menopause (premenopausal, 40-44 years, 45-49 years, 50-54 years, 55+ years), and parity (0 children, 1 child, 2 children, 3+ children).

**eFigure 9.** Multivariable\* hazard ratios (HRs) and 95% confidence intervals (CIs) in the NIH-AARP Diet and Health Study for breast cancer subtypes (Panel A), for prostate cancer subtypes (Panel B), and for malignant melanoma, stratified by ground level solar ultraviolet radiation† (Panel C).

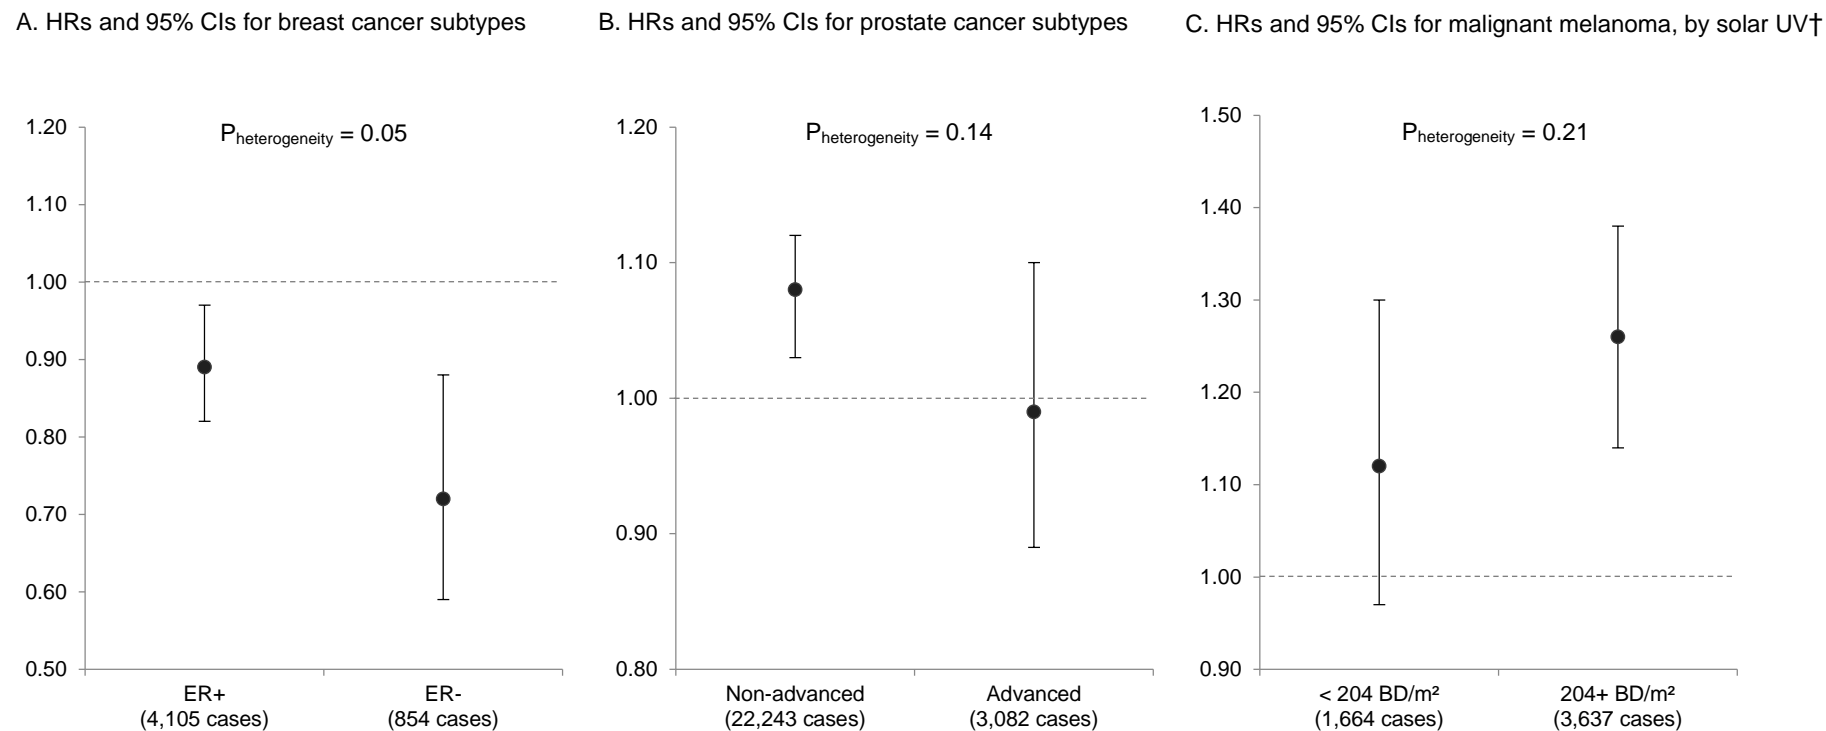

\* Multivariable models were adjusted for age, gender, smoking status (never, former, current), alcohol consumption (0, 0.1-14.9, 15.0-29.9 and 30.0+ g/day), education (did not complete high school, completed high school, post high-school training, some college, completed college), and race/ethnicity (white, black, other). Models for breast cancer are additionally adjusted for postmenopausal hormone therapy use (ever, never), oral contraceptive use (ever, never), age at menarche (<10 years, 10-11 years, 12-13 years, 14+ years), age at menopause (premenopausal, 40-44 years, 45-49 years, 50-54 years, 55+ years), and parity (0 children, 1 child, 2 children, 3+ children)

† Ground-level solar ultraviolet radiation (erythemal dose) was assessed by linking census tract of participant residence to the Total Ozone Mapping Spectrometer (TOMS) dataset of the National Aeronautics and Space Administration. The erythemal dose is based on average noon-time exposure during the month of July and is defined specifically in terms of biological damage per square meter (BD/m<sup>2</sup>).

## **eAcknowledgments**

This work was supported by the Intramural Research Program of the National Cancer Institute, National Institutes of Health, Department of Health and Human Services (Z99 CA999999).

The NIH-AARP Diet and Health study was supported by the Intramural Research Program of the National Cancer Institute, National Institutes of Health.

The BCDDP Follow-up Study has been supported by the Intramural Research Program of the National Cancer Institute, National Institutes of Health.

The CPS-II Nutrition Cohort, including its creation, maintenance, and updating, is funded by the American Cancer Society (ACS).

The Cohort of Swedish Men was supported by the Swedish Research Council, the Swedish Council for Working Life and Social Research, and the Swedish Cancer Foundation.

The EPIC national cohorts are supported by Danish Cancer Society (Denmark); Ligue Contre le Cancer, Institut Gustave Roussy, Mutuelle Générale de l'Éducation Nationale, Institut National de la Santé et de la Recherche Médicale (INSERM) (France); German Cancer Aid, German Cancer Research Center (DKFZ), Federal Ministry of Education and Research (BMBF), Deutsche Krebshilfe, Deutsches Krebsforschungszentrum and Federal Ministry of Education and Research (Germany); the Hellenic Health Foundation (Greece); Associazione Italiana per la Ricerca sul Cancro-AIRC-Italy and National Research Council (Italy); Dutch Ministry of Public Health, Welfare and Sports (VWS), Netherlands Cancer Registry (NKR), LK Research Funds, Dutch Prevention Funds, Dutch ZON (Zorg Onderzoek Nederland), World Cancer Research Fund (WCRF), Statistics Netherlands (The Netherlands); ERC-2009-AdG 232997 and Nordforsk, Nordic Centre of Excellence programme on Food, Nutrition and Health (Norway); PI13/00061 to Granada, PI13/01162 to EPIC-Murcia, ISCIII RETIC (RD06/0020), Health Research Fund (FIS), Regional Governments of Andalucía, Asturias, Basque Country, Murcia and Navarra, and the ISCIII RETIC (RD06/0020) (Spain); Swedish Cancer Society, Swedish Scientific Council and Regional Government of Skåne and Västerbotten (Sweden); Cancer Research UK (14136 to EPIC-Norfolk, C570/A16491 and C8221/A19170 to EPIC-Oxford), Medical Research Council (1000143 to EPIC-Norfolk, MR/M012190/1 to EPIC-Oxford) (United Kingdom). The funding organizations had no role in the study design, or in the collection, analysis, and interpretation of data, in the writing of the manuscript, or in the decision to submit the manuscript for publication.

The Iowa Women's Health Study is supported by a grant from the National Cancer Institute (R01 CA39742).

The Physicians' Health Study was supported by grants CA 97193, CA 34944, CA 40360, HL 26490, and HL 34595 from the National Institutes of Health.

For their contributions to making the PLCO study possible, we thank Dr Christine Berg and Philip Prorok (Division of Cancer Prevention, National Cancer Institute), the Screening Center investigators and staff of the PLCO Cancer Screening Trial, Tom Riley and staff (Information Management Services, Inc.), Barbara O'Brien and staff (Westat, Inc.), and Jackie King (Bioreliance, Rockville).

The Swedish Mammography Cohort was supported by the Swedish Research Council, Swedish Council for Working Life and Social Research and the Swedish Cancer Foundation.

The USRT was supported by the Intramural Research Program of the National Cancer Institute, National Institutes of Health.

The WHS was supported by CA047988, HL043851, and HL080467.

The Women's Lifestyle and Health project was supported by the Swedish Cancer Society and the Swedish Research Council.
